# Supplementary material for: Peer review of the pesticide risk assessment of the active substance oxasulfuron
Source: PubMed Central journal article supplement (PMC7009934; doi:10.2903/j.efsa.2017.4722), 2017-03-13
Supplement: EFS2-15-e04722-s001.pdf [file EFS2-15-e04722-s001.pdf]

Appendix to:

EFSA (European Food Safety Authority), 2017. Conclusion on the peer review of the pesticide risk assessment of the active substance oxasulfuron, EFSA Journal 2017;15(3):4722, doi:10.2903/j.efsa.2017.4722

© European Food Safety Authority, 2017

## Appendix A – List of end points for the active substance and the representative formulation

### Identity, Physical and Chemical Properties, Details of Uses, Further Information (Regulation (EU) N° 283/2013, Annex Part A, points 1.3 and 3.2)

|                                    |             |
|------------------------------------|-------------|
| Active substance (ISO Common Name) | Oxasulfuron |
| Function ( <i>e.g.</i> fungicide)  | Herbicide   |
| Rapporteur Member State            | Italy       |
| Co-rapporteur Member State         | Austria     |

### Identity (Regulation (EU) N° 283/2013, Annex Part A, point 1)

|                                                                                                                                           |                                                                                      |
|-------------------------------------------------------------------------------------------------------------------------------------------|--------------------------------------------------------------------------------------|
| Chemical name (IUPAC)                                                                                                                     | oxetan-3-yl 2-[(4,6-dimethylpyrimidin-2-yl)carbamoylsulfamoyl]benzoate               |
| Chemical name (CA)                                                                                                                        | 3-oxetan 2-[[[(4,6-dimethyl-2-pyrimidinyl)-amino]carbonyl]amino]sulfonyl]benzoate    |
| CIPAC No                                                                                                                                  | 626                                                                                  |
| CAS No                                                                                                                                    | 144651-06-9                                                                          |
| EC No (EINECS or ELINCS)                                                                                                                  | 604-430-5                                                                            |
| FAO Specification (including year of publication)                                                                                         | Not available                                                                        |
| Minimum purity of the active substance as manufactured                                                                                    | 985 g/kg                                                                             |
| Identity of relevant impurities (of toxicological, ecotoxicological and/or environmental concern) in the active substance as manufactured | None                                                                                 |
| Molecular formula                                                                                                                         | C <sub>17</sub> H <sub>18</sub> N <sub>4</sub> O <sub>6</sub> S                      |
| Molar mass                                                                                                                                | 406.4 g/mol                                                                          |
| Structural formula                                                                                                                        | 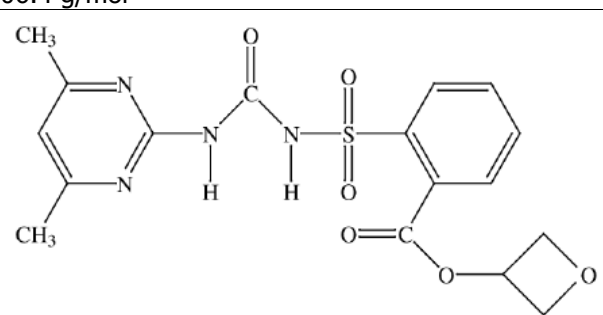 |

## Physical and chemical properties (Regulation (EU) N° 283/2013, Annex Part A, point 2)

|                                                                     |                                                                                                                                                                                                                                                                                                   |
|---------------------------------------------------------------------|---------------------------------------------------------------------------------------------------------------------------------------------------------------------------------------------------------------------------------------------------------------------------------------------------|
| Melting point (state purity)                                        | 158°C with thermal decomposition (99.5%)                                                                                                                                                                                                                                                          |
| Boiling point (state purity)                                        | Not measurable because of decomposition                                                                                                                                                                                                                                                           |
| Temperature of decomposition (state purity)                         | ≥ 158°C (Purity: ≤99.5%)                                                                                                                                                                                                                                                                          |
| Appearance (state purity)                                           | White fine powder, odourless (Purity: 99.5%)                                                                                                                                                                                                                                                      |
| Vapour pressure (state temperature, state purity)                   | < 2·10 <sup>-6</sup> Pa at 25°C (Purity: 99.5%)                                                                                                                                                                                                                                                   |
| Henry's law constant (state temperature)                            | 2.5·10 <sup>-3</sup> Pa m <sup>3</sup> mol <sup>-1</sup> (calculated, 25°C)                                                                                                                                                                                                                       |
| Solubility in water (state temperature, state purity and pH)        | Solubility in water (25°C, Purity: 99.5%):<br>pH 5.1: 52 mg/l (pure water)<br>pH 5.0: 63 mg/l (buffer solution)<br>pH 6.8: 1700 mg/l (buffer solution)<br>pH 7.8: 19 g/l (buffer solution)                                                                                                        |
|                                                                     | Solubility in water (20°C, Purity: 98.2%):<br>pH 5: 65.5 mg/l (double distilled water)<br>pH 4: 69.9 mg/l (buffer solution)<br>pH 7: 1.78 g/l (buffer solution)<br>pH 9: 7.91 g/l (buffer solution)                                                                                               |
| Solubility in organic solvents (state temperature, state purity)    | Solubility in organic solvents (25°C, Purity: 99.5%)<br>hexane: 0.002 g/L<br>toluene: 0.32 g/L<br>dichloromethane: 69 g/L<br>methanol: 1.5 g/L<br>octanol: 0.099 g/L<br>acetone: 9.3 g/L<br>ethylacetate: 2.3 g/L                                                                                 |
| Surface tension (state concentration and temperature, state purity) | Data gap                                                                                                                                                                                                                                                                                          |
| Partition coefficient (state temperature, pH and purity)            | log P <sub>ow</sub> at 25°C (Purity: 99.5%), uncorrected:<br>0.75 ± (0.008) at pH 5.0<br>-0.81 ± (0.006) at pH 7.0<br>-2.2 ± (0.016) at pH 8.9<br><br>log P <sub>ow</sub> at 25°C (Purity: 99.5%), corrected:<br>1.021± (0.004) at pH 5.0<br>1.079± (0.016) at pH 7.0<br>1.625± (0.016) at pH 8.9 |
| Dissociation constant (state purity)                                | Dissociation constant (Purity: 99.5%):<br>pK <sub>a,1</sub> = 5.10 (acidic)<br>pK <sub>a,2</sub> = < 1 (basic)<br><br>The acidic dissociation constant describes the dissociation of the acidic proton of oxasulfuron in water according to the following equation                                |

| 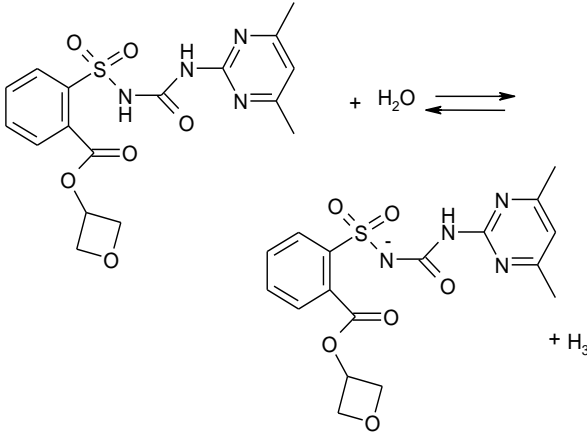                                                                                                                                                                                                                                                                                                                                               | <p>UV/VIS of purified oxasulfuron (99.5%) in methanol:</p> <table border="1"> <thead> <tr> <th><math>\lambda_{\max}</math> (nm)</th> <th><math>\epsilon</math> (L mol<sup>-1</sup> cm<sup>-1</sup>)</th> </tr> </thead> <tbody> <tr> <td>232.7</td> <td>23719</td> </tr> <tr> <td>271.2</td> <td>5951</td> </tr> </tbody> </table> <p><math>\epsilon</math> at 290 nm: not determined<br/>No absorption between 300 nm and 900 nm was observed.</p> | $\lambda_{\max}$ (nm)                              | $\epsilon$ (L mol <sup>-1</sup> cm <sup>-1</sup> ) | 232.7 | 23719 | 271.2 | 5951                                                                                                                                                                                                                                                                                                                                                                                                                                                                                                                                                                                                                                                             |                       |                                                    |     |       |     |      |                       |                                                    |     |       |
|----------------------------------------------------------------------------------------------------------------------------------------------------------------------------------------------------------------------------------------------------------------------------------------------------------------------------------------------------------------------------------------------------------------------------------|-----------------------------------------------------------------------------------------------------------------------------------------------------------------------------------------------------------------------------------------------------------------------------------------------------------------------------------------------------------------------------------------------------------------------------------------------------|----------------------------------------------------|----------------------------------------------------|-------|-------|-------|------------------------------------------------------------------------------------------------------------------------------------------------------------------------------------------------------------------------------------------------------------------------------------------------------------------------------------------------------------------------------------------------------------------------------------------------------------------------------------------------------------------------------------------------------------------------------------------------------------------------------------------------------------------|-----------------------|----------------------------------------------------|-----|-------|-----|------|-----------------------|----------------------------------------------------|-----|-------|
| $\lambda_{\max}$ (nm)                                                                                                                                                                                                                                                                                                                                                                                                            | $\epsilon$ (L mol <sup>-1</sup> cm <sup>-1</sup> )                                                                                                                                                                                                                                                                                                                                                                                                  |                                                    |                                                    |       |       |       |                                                                                                                                                                                                                                                                                                                                                                                                                                                                                                                                                                                                                                                                  |                       |                                                    |     |       |     |      |                       |                                                    |     |       |
| 232.7                                                                                                                                                                                                                                                                                                                                                                                                                            | 23719                                                                                                                                                                                                                                                                                                                                                                                                                                               |                                                    |                                                    |       |       |       |                                                                                                                                                                                                                                                                                                                                                                                                                                                                                                                                                                                                                                                                  |                       |                                                    |     |       |     |      |                       |                                                    |     |       |
| 271.2                                                                                                                                                                                                                                                                                                                                                                                                                            | 5951                                                                                                                                                                                                                                                                                                                                                                                                                                                |                                                    |                                                    |       |       |       |                                                                                                                                                                                                                                                                                                                                                                                                                                                                                                                                                                                                                                                                  |                       |                                                    |     |       |     |      |                       |                                                    |     |       |
| <p>UV/VIS of non-purified oxasulfuron (98.2%) in aqueous methanol solution:</p> <table border="1"> <thead> <tr> <th><math>\lambda_{\max}</math> (nm)</th> <th><math>\epsilon</math> (L mol<sup>-1</sup> cm<sup>-1</sup>)</th> </tr> </thead> <tbody> <tr> <td>231</td> <td>25024</td> </tr> <tr> <td>271</td> <td>613</td> </tr> </tbody> </table> <p><math>\epsilon</math> at 290 nm: 1002 L·M<sup>-1</sup>·cm<sup>-1</sup></p> | $\lambda_{\max}$ (nm)                                                                                                                                                                                                                                                                                                                                                                                                                               | $\epsilon$ (L mol <sup>-1</sup> cm <sup>-1</sup> ) | 231                                                | 25024 | 271   | 613   | <p><u>pH &lt; 2 (0.1 mol/L aqueous HCl)</u></p> <table border="1"> <thead> <tr> <th><math>\lambda_{\max}</math> (nm)</th> <th><math>\epsilon</math> (L mol<sup>-1</sup> cm<sup>-1</sup>)</th> </tr> </thead> <tbody> <tr> <td>232</td> <td>24661</td> </tr> <tr> <td>271</td> <td>5950</td> </tr> </tbody> </table> <p><u>pH &gt; 10 (0.1 mol/L aqueous NaOH)</u></p> <table border="1"> <thead> <tr> <th><math>\lambda_{\max}</math> (nm)</th> <th><math>\epsilon</math> (L mol<sup>-1</sup> cm<sup>-1</sup>)</th> </tr> </thead> <tbody> <tr> <td>242</td> <td>27563</td> </tr> </tbody> </table> <p>No absorption between 300 nm and 900 nm was observed.</p> | $\lambda_{\max}$ (nm) | $\epsilon$ (L mol <sup>-1</sup> cm <sup>-1</sup> ) | 232 | 24661 | 271 | 5950 | $\lambda_{\max}$ (nm) | $\epsilon$ (L mol <sup>-1</sup> cm <sup>-1</sup> ) | 242 | 27563 |
| $\lambda_{\max}$ (nm)                                                                                                                                                                                                                                                                                                                                                                                                            | $\epsilon$ (L mol <sup>-1</sup> cm <sup>-1</sup> )                                                                                                                                                                                                                                                                                                                                                                                                  |                                                    |                                                    |       |       |       |                                                                                                                                                                                                                                                                                                                                                                                                                                                                                                                                                                                                                                                                  |                       |                                                    |     |       |     |      |                       |                                                    |     |       |
| 231                                                                                                                                                                                                                                                                                                                                                                                                                              | 25024                                                                                                                                                                                                                                                                                                                                                                                                                                               |                                                    |                                                    |       |       |       |                                                                                                                                                                                                                                                                                                                                                                                                                                                                                                                                                                                                                                                                  |                       |                                                    |     |       |     |      |                       |                                                    |     |       |
| 271                                                                                                                                                                                                                                                                                                                                                                                                                              | 613                                                                                                                                                                                                                                                                                                                                                                                                                                                 |                                                    |                                                    |       |       |       |                                                                                                                                                                                                                                                                                                                                                                                                                                                                                                                                                                                                                                                                  |                       |                                                    |     |       |     |      |                       |                                                    |     |       |
| $\lambda_{\max}$ (nm)                                                                                                                                                                                                                                                                                                                                                                                                            | $\epsilon$ (L mol <sup>-1</sup> cm <sup>-1</sup> )                                                                                                                                                                                                                                                                                                                                                                                                  |                                                    |                                                    |       |       |       |                                                                                                                                                                                                                                                                                                                                                                                                                                                                                                                                                                                                                                                                  |                       |                                                    |     |       |     |      |                       |                                                    |     |       |
| 232                                                                                                                                                                                                                                                                                                                                                                                                                              | 24661                                                                                                                                                                                                                                                                                                                                                                                                                                               |                                                    |                                                    |       |       |       |                                                                                                                                                                                                                                                                                                                                                                                                                                                                                                                                                                                                                                                                  |                       |                                                    |     |       |     |      |                       |                                                    |     |       |
| 271                                                                                                                                                                                                                                                                                                                                                                                                                              | 5950                                                                                                                                                                                                                                                                                                                                                                                                                                                |                                                    |                                                    |       |       |       |                                                                                                                                                                                                                                                                                                                                                                                                                                                                                                                                                                                                                                                                  |                       |                                                    |     |       |     |      |                       |                                                    |     |       |
| $\lambda_{\max}$ (nm)                                                                                                                                                                                                                                                                                                                                                                                                            | $\epsilon$ (L mol <sup>-1</sup> cm <sup>-1</sup> )                                                                                                                                                                                                                                                                                                                                                                                                  |                                                    |                                                    |       |       |       |                                                                                                                                                                                                                                                                                                                                                                                                                                                                                                                                                                                                                                                                  |                       |                                                    |     |       |     |      |                       |                                                    |     |       |
| 242                                                                                                                                                                                                                                                                                                                                                                                                                              | 27563                                                                                                                                                                                                                                                                                                                                                                                                                                               |                                                    |                                                    |       |       |       |                                                                                                                                                                                                                                                                                                                                                                                                                                                                                                                                                                                                                                                                  |                       |                                                    |     |       |     |      |                       |                                                    |     |       |
| <p>Flammability (state purity)</p>                                                                                                                                                                                                                                                                                                                                                                                               | <p>Not highly flammable (Purity: 96.1%)<br/>auto-flammability: data gap</p>                                                                                                                                                                                                                                                                                                                                                                         |                                                    |                                                    |       |       |       |                                                                                                                                                                                                                                                                                                                                                                                                                                                                                                                                                                                                                                                                  |                       |                                                    |     |       |     |      |                       |                                                    |     |       |
| <p>Explosive properties (state purity)</p>                                                                                                                                                                                                                                                                                                                                                                                       | <p>Not explosive (Purity: 96.1%)</p>                                                                                                                                                                                                                                                                                                                                                                                                                |                                                    |                                                    |       |       |       |                                                                                                                                                                                                                                                                                                                                                                                                                                                                                                                                                                                                                                                                  |                       |                                                    |     |       |     |      |                       |                                                    |     |       |
| <p>Oxidising properties (state purity)</p>                                                                                                                                                                                                                                                                                                                                                                                       | <p>Not oxidizing (Purity: 96.1%)</p>                                                                                                                                                                                                                                                                                                                                                                                                                |                                                    |                                                    |       |       |       |                                                                                                                                                                                                                                                                                                                                                                                                                                                                                                                                                                                                                                                                  |                       |                                                    |     |       |     |      |                       |                                                    |     |       |

**Summary of representative uses evaluated, for which all risk assessments needed to be completed (oxasulfuron)  
(Regulation (EU) N° 284/2013, Annex Part A, points 3, 4)**

| Crop and/or situation (a) | Member State or Country | Product name | F G or I (b) | Pests or Group of pests controlled (c) | Preparation |               | Application       |                                                                                        |                    |                                    | Application rate per treatment |                    |                        | PHI (days) (m) | Remarks                       |
|---------------------------|-------------------------|--------------|--------------|----------------------------------------|-------------|---------------|-------------------|----------------------------------------------------------------------------------------|--------------------|------------------------------------|--------------------------------|--------------------|------------------------|----------------|-------------------------------|
|                           |                         |              |              |                                        | Type (d-f)  | Conc a.s. (i) | method kind (f-h) | range of growth stages & season (j)                                                    | number min-max (k) | Interval between application (min) | kg a.s./hL min-max (l)         | Water L/ha min-max | kg a.s./ha min-max (l) |                |                               |
| Soya bean                 | S EU                    | Laguna 75 WG | F            | Grass & Broad leaved weeds             | WG          | 750 g/kg      | spraying          | between BBCH 10 and BBCH14 (from visible cotyledon to fourth trifoliate leaf unfolded) | 1 (in full dose)   | -                                  | 18.75 - 75                     | 100 - 400          | 0.075                  | -              | 0.1 kg/ha (product dose rate) |

(a) For crops, the EU and Codex classifications (both) should be taken into account; where relevant, the use situation should be described (e.g. fumigation of a structure)

(b) Outdoor or field use (F), greenhouse application (G) or indoor application (I)

(c) e.g. biting and sucking insects, soil born insects, foliar fungi, weeds

(d) e.g. wettable powder (WP), emulsifiable concentrate (EC), granule (GR)

(e) CropLife International Technical Monograph no 2, 6th Edition. Revised May 2008. Catalogue of pesticide

(f) All abbreviations used must be explained

(g) Method, e.g. high volume spraying, low volume spraying, spreading, dusting, drench

(h) Kind, e.g. overall, broadcast, aerial spraying, row, individual plant, between the plant- type of equipment used must be indicated

(i) g/kg or g/L. Normally the rate should be given for the active substance (according to ISO) and not for the variant in order to compare the rate for same active substances used in different variants (e.g. fluoroxypr). **In certain cases, where only one variant is synthesised, it is more appropriate to give the rate for the variant (e.g. benthialdicarb-isopropyl).**

(j) Growth stage range from first to last treatment (BBCH Monograph, Growth Stages of Plants, 1997, Blackwell, ISBN 3-8263-3152-4), including where relevant, information on season at time of application

(k) Indicate the minimum and maximum number of applications possible under practical conditions of use

(l) The values should be given in g or kg whatever gives the more manageable number (e.g. 200 kg/ha instead of 200 000 g/ha or 12.5 g/ha instead of 0.0125 kg/ha)

(m) PHI - minimum pre-harvest interval

**Summary of additional intended uses for which MRL applications have been made, that in addition to the uses above, have also been considered in the consumer risk assessment (*name of active substance or the respective variant*)**  
**Regulation (EC) N° 1107/2009 Article 8.1(g)**

**Important note: efficacy, environmental risk and risk to humans by exposure other than via their diet have not been assessed for these uses**

| Crop and/or situation (a)                                                            | Member State or Country | Product name | F G or I (b) | Pests or Group of pests controlled (c) | Preparation |                | Application       |                                     |                    |                                    | Application rate per treatment |                    |                        | PHI (days) (m) | Remarks |
|--------------------------------------------------------------------------------------|-------------------------|--------------|--------------|----------------------------------------|-------------|----------------|-------------------|-------------------------------------|--------------------|------------------------------------|--------------------------------|--------------------|------------------------|----------------|---------|
|                                                                                      |                         |              |              |                                        | Type (d-f)  | Conc. a.s. (i) | method kind (f-h) | range of growth stages & season (j) | number min-max (k) | Interval between application (min) | kg a.s./hL min-max (l)         | Water L/ha min-max | kg a.s./ha min-max (l) |                |         |
| <b>MRL Application</b> (according to Article 8.1(g) of Regulation (EC) No 1107/2009) |                         |              |              |                                        |             |                |                   |                                     |                    |                                    |                                |                    |                        |                |         |
|                                                                                      |                         |              |              |                                        |             |                |                   |                                     |                    |                                    |                                |                    |                        |                |         |

(a) For crops, the EU and Codex classifications (both) should be taken into account; where relevant, the use situation should be described (e.g. fumigation of a structure)

(b) Outdoor or field use (F), greenhouse application (G) or indoor application (I)

(c) e.g. biting and sucking insects, soil born insects, foliar fungi, weeds

(d) e.g. wettable powder (WP), emulsifiable concentrate (EC), granule (GR)

(e) CropLife International Technical Monograph no 2, 6th Edition. Revised May 2008. Catalogue of pesticide

(f) All abbreviations used must be explained

(g) Method, e.g. high volume spraying, low volume spraying, spreading, dusting, drench

(h) Kind, e.g. overall, broadcast, aerial spraying, row, individual plant, between the plant- type of equipment used must be indicated

(i) g/kg or g/L. Normally the rate should be given for the active substance (according to ISO) and not for the variant in order to compare the rate for same active substances used in different variants (e.g. fluoroxypyr). **In certain cases, where only one variant is synthesised, it is more appropriate to give the rate for the variant (e.g. benthialdicarb-isopropyl).**

(j) Growth stage range from first to last treatment (BBCH Monograph, Growth Stages of Plants, 1997, Blackwell, ISBN 3-8263-3152-4), including where relevant, information on season at time of application

(k) Indicate the minimum and maximum number of applications possible under practical conditions of use

(l) The values should be given in g or kg whatever gives the more manageable number (e.g. 200 kg/ha instead of 200 000 g/ha or 12.5 g/ha instead of 0.0125 kg/ha)

(m) PHI - minimum pre-harvest interval

## Further information, Efficacy

### Effectiveness (Regulation (EU) N° 284/2013, Annex Part A, point 6.2)

Oxasulfuron is a herbicide and target weeds are *Abutilon theophrasti*, *Amaranthus retroflexus*, *Chenopodium album*, *Echinochloa crus-galli*, *Sorghum halepense* and *Polygonum spp.* between the cotyledons and the 4 leaves stage (BBCH 10-14) in soybean.

After application of oxasulfuron, growth of susceptible plant species ceases, followed by yellow or red discoloration. Death of those species affected occurs within one to three weeks. The visible symptoms of affected plants are like those of other sulfonylurea herbicides.

### Adverse effects on field crops (Regulation (EU) N° 284/2013, Annex Part A, point 6.4)

The repeated use of this product or with herbicides with the same mode of action may lead to selection of resistant weeds.

In order to prevent or slow down developing of resistant weed biotypes it is recommended to rotate with products having a different mode of action. The main emphasis should be on cultural options – rotation, cultivation and preventing weed spread.

### Observations on other undesirable or unintended side-effects (Regulation (EU) N° 284/2013, Annex Part A, point 6.5)

Oxasulfuron and other sulfonylurea herbicides are given a classification B under Herbicide Resistance Action Committee (HRAC).

On 10<sup>th</sup> August 2015, 156 weed species were reported to have developed resistance to 'Group B' herbicides, among them 63 are reported for Europe.

The decision, if a resistance risk is acceptable, is following the EPPO (2003) guidelines, depends on whether the benefit of a compound is greater than a possible resistance risk.

Sulfonylurea herbicides are known to pose a higher resistance risk than other modes of action.

### Groundwater metabolites: Screening for biological activity (SANCO/221/2000-rev.10-final Step 3 a Stage 1)

Activity against target organism

|                |                |                |                         |                       |
|----------------|----------------|----------------|-------------------------|-----------------------|
| M3             | M5(CGA 171895) | MT6            | oxetan-3-ol(CGA 297691) | Saccharin (CGA 27913) |
| No information | No information | No information | Data gap                | No                    |

## Methods of Analysis

### Analytical methods for the active substance (Regulation (EU) N° 283/2013, Annex Part A, point 4.1 and Regulation (EU) N° 284/2013, Annex Part A, point 5.2)

|                                                     |                        |
|-----------------------------------------------------|------------------------|
| Technical a.s. (analytical technique)               | HPLC-UV (220 nm)       |
| Impurities in technical a.s. (analytical technique) | Karl Fischer titration |
| Plant protection product (analytical technique)     | HPLC-UV (235 nm)       |

### Analytical methods for residues (Regulation (EU) N° 283/2013, Annex Part A, point 4.2 & point 7.4.2)

#### Residue definitions for monitoring purposes

|                         |                     |
|-------------------------|---------------------|
| Food of plant origin    | Oxasulfuron         |
| Food of animal origin   | None proposed       |
| Soil                    | Oxasulfuron         |
| Sediment                | Oxasulfuron         |
| Water surface           | Oxasulfuron M3, MT6 |
| drinking/ground         | Oxasulfuron         |
| Air                     | Oxasulfuron         |
| Body fluids and tissues | Oxasulfuron         |

#### Monitoring/Enforcement methods

|                                                                                               |                                                                                                                                                                               |
|-----------------------------------------------------------------------------------------------|-------------------------------------------------------------------------------------------------------------------------------------------------------------------------------|
| Food/feed of plant origin (analytical technique and LOQ for methods for monitoring purposes)  | <u>Substrates:</u> soya beans<br><u>Analysis:</u> LC-MS/MS<br><u>Determined analyte:</u> oxasulfuron<br><u>LOQ=</u> 0,01 mg/kg<br>Method fully validated<br><br>data gap: ILV |
| Food/feed of animal origin (analytical technique and LOQ for methods for monitoring purposes) | No method required.                                                                                                                                                           |
| Soil (analytical technique and LOQ)                                                           | Data gap                                                                                                                                                                      |
| Water (analytical technique and LOQ)                                                          | Data gap                                                                                                                                                                      |
| Air (analytical technique and LOQ)                                                            | Data gap                                                                                                                                                                      |
| Body fluids and tissues (analytical technique and LOQ)                                        | Data gap                                                                                                                                                                      |

### Classification and labelling with regard to physical and chemical data (Regulation (EU) No. 283/2013, Annex Part A, point 10)

|           |                                                                                                  |
|-----------|--------------------------------------------------------------------------------------------------|
| Substance | oxasulfuron (ISO)<br>oxetan-3-yl 2-[(4,6-dimethylpyrimidin-2-yl)-<br>carbamoylsulfamoyl]benzoate |
|-----------|--------------------------------------------------------------------------------------------------|

Harmonised classification according to Regulation (EC) No 1272/2008 and its Adaptations to Technical Process [Table 3.1 of Annex VI of Regulation (EC) No 1272/2008 as amended]<sup>1</sup>:

No current harmonised classification with regard to physical and chemical data.

Peer review proposal <sup>2</sup> for harmonised classification according to Regulation (EC) No 1272/2008:

None

## Impact on Human and Animal Health

### Absorption, distribution, metabolism and excretion (toxicokinetics) (Regulation (EU) N° 283/2013, Annex Part A, point 5.1)

Rate and extent of oral absorption/systemic bioavailability

Rapidly and highly absorbed: >80% within 48 hours, based on urine excretion

Toxicokinetics

C<sub>max</sub>: 20 ppm at a dose of 5 mg/kg bw and 200 ppm at 100 mg/kg bw

T<sub>max</sub>: 1h (rat)

T<sub>1/2</sub>: 6-8h (female), 11-14 h (male) in rat (blood)

Distribution

Widely distributed; highest levels in plasma, liver, kidneys and red blood cells

Potential for bioaccumulation

No evidence for accumulation

Rate and extent of excretion

Rapid (app. 84.4 to 97.2 % within 48 h), mainly via urine and faeces

Metabolism in animals

Up to 86% excreted as parent compound (CGA 277476). Metabolism included cleavage of the sulfonyl urea bridge, hydroxylation of the pyrimidinyl-methyl group, hydrolysis of the oxetanyl ester, and opening of the oxetane ring

*In vitro* metabolism

Data gap

Toxicologically relevant compounds (animals and plants)

Oxasulfuron (CGA 277476)

Toxicologically relevant compounds (environment)

oxetan-3-ol

### Acute toxicity (Regulation (EU) N° 283/2013, Annex Part A, point 5.2)

Rat LD<sub>50</sub> oral

> 5000 mg/kg bw

Rat LD<sub>50</sub> dermal

> 2000 mg/kg bw

Rat LC<sub>50</sub> inhalation

> 5082 mg/m<sup>3</sup> (4h, nose-only exposure)

Skin irritation

Non-irritant

Eye irritation

Non-irritant

Skin sensitisation

Not- Sensitising (Buehler test, and Maximization)

<sup>1</sup> Regulation (EC) No 1272/2008 of the European Parliament and of the Council of 16 December 2008 on classification, labelling and packaging of substances and mixtures, amending and repealing Directives 67/548/EEC and 1999/45/EC, and amending Regulation (EC) No 1907/2006. OJ L 353, 31.12.2008, 1-1355.

<sup>2</sup> It should be noted that harmonised classification and labelling is formally proposed and decided in accordance with Regulation (EC) No 1272/2008. Proposals for classification made in the context of the evaluation procedure under Regulation (EC) No 1107/2009 are not formal proposals.



|               |                                              |
|---------------|----------------------------------------------|
|               | test)                                        |
| Phototoxicity | not phototoxic, unlikely to be photoreactive |

### Short-term toxicity (Regulation (EU) N° 283/2013, Annex Part A, point 5.3)

|                                |                                                                                                                                                                                                                                                                                                                                                                                                                                                                                                                                                                               |
|--------------------------------|-------------------------------------------------------------------------------------------------------------------------------------------------------------------------------------------------------------------------------------------------------------------------------------------------------------------------------------------------------------------------------------------------------------------------------------------------------------------------------------------------------------------------------------------------------------------------------|
| Target organ / critical effect | <p><b>Rat:</b> liver (hepatocyte hypertrophy), spleen (hyperplasia of lymphatic follicles ) urinary system (inflammation of urinary bladder, pelvis dilatation in the kidney)and testis (inflammation of epididymis)</p> <p><b>Dog:</b> peripheral nerves (degeneration), muscles (weakness), brain (vacuolation), testes (decreased spermatogenic activity, accumulation of atypical cells in the lumen of the seminiferous tubules and oligospermia in the epididymides)</p> <p><b>Mouse:</b> effect on the liver (increased serum 5' nucleotidase) and red blood cells</p> |
| Relevant oral NOAEL            | <p>Rat: 15.3 mg/kg bw per day (90-day)</p> <p>Dog: 1.3 mg/kg bw per day (90-day and 1-yr)</p> <p>Mouse: 672 mg/kg bw per day</p>                                                                                                                                                                                                                                                                                                                                                                                                                                              |
| Relevant dermal NOAEL          | Rat: >1000 mg/kg bw per day (28-day)                                                                                                                                                                                                                                                                                                                                                                                                                                                                                                                                          |
| Relevant inhalation NOAEL      | No data - not required                                                                                                                                                                                                                                                                                                                                                                                                                                                                                                                                                        |

### Genotoxicity (Regulation (EU) N° 283/2013, Annex Part A, point 5.4)

|                            |                                                                                                                                                                                                                                                                                                                                                                 |
|----------------------------|-----------------------------------------------------------------------------------------------------------------------------------------------------------------------------------------------------------------------------------------------------------------------------------------------------------------------------------------------------------------|
| <i>In vitro</i> studies    | <p><u>Bacterial gene mutation assay:</u><br/>non mutagenic with and without metabolic activation in <i>S. typhimurium</i> and <i>E. Coli</i></p> <p><u>Mammalian gene mutation assay:</u><br/>non mutagenic</p> <p><u>Mammalian cytogenetic assay:</u><br/>Equivocal</p> <p><u>Unscheduled DNA repair assay:</u><br/>no induction of unscheduled DNA repair</p> |
| <i>In vivo</i> studies     | <p><u>Micronucleus test:</u><br/>not clastogenic or aneugenic</p>                                                                                                                                                                                                                                                                                               |
| Photomutagenicity          | No data - not required                                                                                                                                                                                                                                                                                                                                          |
| Potential for genotoxicity | Oxasulfuron is unlikely to be genotoxic                                                                                                                                                                                                                                                                                                                         |

### Long-term toxicity and carcinogenicity (Regulation (EU) N°283/2013, Annex Part A, point 5.5)

|                                                  |                                                                                                                                                                                                                                                                                                   |                 |
|--------------------------------------------------|---------------------------------------------------------------------------------------------------------------------------------------------------------------------------------------------------------------------------------------------------------------------------------------------------|-----------------|
| Long-term effects (target organ/critical effect) | <b>Mice:</b> peripheral nerves (axonal degeneration), liver (hypertrophy).<br><b>Rats:</b> peripheral nerves (axonal degeneration), kidney (nephritis), liver (bile duct hyperplasia/ fibrosis), spleen (lymphatic depletion, pigmentation), testes (degeneration), muscles (neurogenic atrophy). |                 |
| Relevant long-term NOAEL                         | Mouse: 1.5 mg/kg bw per day (18-month)<br>Rat: 8.3 mg/kg bw per day (2-year)                                                                                                                                                                                                                      |                 |
| Carcinogenicity (target organ, tumour type)      | <b>Mice:</b> no carcinogenic potential<br><b>Rats:</b> Schwannomas at MTD in males were considered related to specific toxicity to the nervous system and not carcinogenic effect relevant to humans.                                                                                             | STOT RE 2, H373 |

### Reproductive toxicity (Regulation (EU) N° 283/2013, Annex Part A, point 5.6)

#### Reproduction toxicity

|                                       |                                                                                                                                                                                               |                   |
|---------------------------------------|-----------------------------------------------------------------------------------------------------------------------------------------------------------------------------------------------|-------------------|
| Reproduction target / critical effect | Parental: decreased body weight gain, effects in testis<br>Offspring: decreased body weight gain<br>Reproductive: reduced number of pregnancies, increased number of post-implantation losses | Repr. cat 2 H361f |
| Relevant parental NOAEL               | 14.75 mg/kg bw per day                                                                                                                                                                        |                   |
| Relevant reproductive NOAEL           | 340.5 mg/kg bw per day                                                                                                                                                                        |                   |
| Relevant offspring NOAEL              | 340.5 mg/kg bw per day                                                                                                                                                                        |                   |

#### Developmental toxicity

|                                        |                                                                                                                         |  |
|----------------------------------------|-------------------------------------------------------------------------------------------------------------------------|--|
| Developmental target / critical effect | Maternal: decreased body weight gain and food consumption (rats)<br>Developmental: increased skeletal variations (rats) |  |
| Relevant maternal NOAEL                | Rat: 300 mg/kg bw per day<br>Rabbit: 1000 mg/kg bw per day                                                              |  |
| Relevant developmental NOAEL           | Rat: 300 mg/kg bw per day<br>Rabbit: 1000 mg/kg bw per day                                                              |  |

### Neurotoxicity (Regulation (EU) N° 283/2013, Annex Part A, point 5.7)

|                        |                                                                                                               |                 |
|------------------------|---------------------------------------------------------------------------------------------------------------|-----------------|
| Acute neurotoxicity    | NOAEL 10 mg/kg bw, based on decreased rectal body temperature in females                                      |                 |
| Repeated neurotoxicity | Peripheral neurotoxicity was observed in rats, mice and dogs in standard short- and long-term studies. It was | STOT RE 2; H373 |

|                                                                              |                                                                                                                                                                                                                                  |  |
|------------------------------------------------------------------------------|----------------------------------------------------------------------------------------------------------------------------------------------------------------------------------------------------------------------------------|--|
|                                                                              | characterised by axonal degeneration of peripheral (motor) nerves leading to neurogenic atrophy of skeletal muscle observed in several species at different dose level and by brain vacuolization observed at 10.7 mg/kg in dog. |  |
| Additional studies (e.g. delayed neurotoxicity, developmental neurotoxicity) | Not required                                                                                                                                                                                                                     |  |

### Other toxicological studies (Regulation (EU) N° 283/2013, Annex Part A, point 5.8)

|                                                                      |                                                                                                                                                                                                                                                                                   |                                                                                                                                               |
|----------------------------------------------------------------------|-----------------------------------------------------------------------------------------------------------------------------------------------------------------------------------------------------------------------------------------------------------------------------------|-----------------------------------------------------------------------------------------------------------------------------------------------|
| Supplementary studies on the active substance                        | <i>Not required</i>                                                                                                                                                                                                                                                               |                                                                                                                                               |
| Endocrine disrupting properties                                      | Not conclusive (data gap)                                                                                                                                                                                                                                                         |                                                                                                                                               |
| Studies performed on metabolites or impurities<br><b>oxetan-3-ol</b> | Acute oral LD <sub>50</sub> > 2000 mg/kg bw(rat)<br>Acute dermal LD <sub>50</sub> > 4000 mg/kg bw(rat)<br>Acute inhalation LC <sub>50</sub> >4.6 mg/L (nose only)<br>Skin irritation Not irritating<br>Eye irritation Not irritating<br>Skin sensitisation Not a sensitiser (M&K) |                                                                                                                                               |
|                                                                      | 28-day dog oral                                                                                                                                                                                                                                                                   | NOAEL = 20 mg/kg bw per day based on minimal hepatocyte hypertrophy                                                                           |
|                                                                      | 90-day dog oral                                                                                                                                                                                                                                                                   | NOAEL = 50 mg/kg bw per day based on changes in erythropoietic system, liver and testes                                                       |
| <b>by-product</b>                                                    | Genotoxicity                                                                                                                                                                                                                                                                      | Negative in bacterial reverse gene mutation assay and cytogenic test in chinese hamster ovaries                                               |
|                                                                      | Genotoxicity                                                                                                                                                                                                                                                                      | Positive in gene mutation assay with <i>E. coli</i> without metabolic activation. No mutagenic activity observed with <i>S. typhimurium</i> . |

### Medical data (Regulation (EU) N° 283/2013, Annex Part A, point 5.9)

|                                                                                                                                                  |
|--------------------------------------------------------------------------------------------------------------------------------------------------|
| No adverse health effects were found in routine medical surveillance of manufacturing plant personnel. No cases of poisoning have been reported. |
|--------------------------------------------------------------------------------------------------------------------------------------------------|

### Summary<sup>3</sup> (Regulation (EU) N°1107/2009, Annex II, point 3.1 and 3.6)

#### oxasulfuron

|                                           | Value<br>(mg/kg bw (per day)) | Study                    | Uncertainty factor |
|-------------------------------------------|-------------------------------|--------------------------|--------------------|
| Acceptable Daily Intake (ADI)             | 0.013                         | 1-year dog<br>90-day dog | 100                |
| Acute Reference Dose (ARfD)               | Not allocated                 |                          |                    |
| Acceptable Operator Exposure Level (AOEL) | 0.013                         | dog, 90-day              | 100                |

Acute Acceptable Operator Exposure Level (AAOEL)

Not allocated

**oxetan-3-ol**

Acceptable Daily Intake (ADI)

0.05

16-week dog study

1000

**saccharin (and OH saccharin)**

Acceptable Daily Intake (ADI)

3.8

SCF (EC, 1997)

**Dermal absorption (Regulation (EU) N° 284/2013, Annex Part A, point 7.3)**

Representative formulation (Laguna 75 WG)

Human/rat *in vitro* studies and rat *in vivo* (triple pack) with the formulation Dynam 75 WG: not representative

Default values: 25% for the concentrate and 75% for the dilution

**Exposure scenarios (Regulation (EU) N° 284/2013, Annex Part A, point 7.2)**

Operators

Use: Soybean, tractor mounted equipment, application rate 75 g as/ha

Exposure estimates (model): % of AOEL

UK POEM

Without PPE  
3000%

Gloves M/L and appl: 462%

German model

Without PPE: 336%

Gloves M/L/Appl and coverall appl  
20%

EFSA guidance

Without PPE  
254%

Gloves and work-wear M/L/Appl  
2.36%

Workers

EFSA guidance:

61% of the AOEL without PPE

Bystanders and residents

EFSA guidance:

Bystander: 2%-20% (adult), 3%-25% (child)

Resident: 2%-25% (adult), 4%-41% (child)

(considering distances of 10m and 1m)

## Classification with regard to toxicological data (Regulation (EU) N° 283/2013, Annex Part A, Section 10)

Substance :

oxasulfuron (ISO)  
oxetan-3-yl 2-[(4,6-dimethylpyrimidin-2-yl)-  
carbamoylsulfamoyl]benzoate

Harmonised classification according to Regulation (EC) No 1272/2008 and its Adaptations to Technical Process [Table 3.1 of Annex VI of Regulation (EC) No 1272/2008 as amended]<sup>4</sup>:

STOT RE 2 - H373  
May cause damage to organs through prolonged or repeated exposure

Peer review proposal<sup>5</sup> for harmonised classification according to Regulation (EC) No 1272/2008:

Repr. Cat 2 - H361f  
Suspected of damaging fertility

## Residues in or on treated products food and feed

### Metabolism in plants (Regulation (EU) N° 283/2013, Annex Part A, points 6.2.1, 6.5.1, 6.6.1 and 6.7.1)

| Primary crops<br>(Plant groups covered)<br><b>OECD Guideline 501</b> | Crop groups         | Crop(s)      | Application(s)                                                                                                                   | DAT (days)                                                                                                                                                                                                                                                                      |
|----------------------------------------------------------------------|---------------------|--------------|----------------------------------------------------------------------------------------------------------------------------------|---------------------------------------------------------------------------------------------------------------------------------------------------------------------------------------------------------------------------------------------------------------------------------|
|                                                                      | Fruit crops         |              |                                                                                                                                  |                                                                                                                                                                                                                                                                                 |
|                                                                      | Root crops          |              |                                                                                                                                  |                                                                                                                                                                                                                                                                                 |
|                                                                      | Leafy crops         |              |                                                                                                                                  |                                                                                                                                                                                                                                                                                 |
|                                                                      | Cereals/grass crops |              |                                                                                                                                  |                                                                                                                                                                                                                                                                                 |
|                                                                      | Pulses/Oilseeds     | Soyabea<br>n | Field application:<br><u>pre-emergence</u> ,<br>1x 87 -111 g<br>a.s./ha;<br><u>post-emergence</u> ,<br>1x 89-90 g a.s./ha        | Field application<br><u>pre-emergence</u> ,<br>35, 42, 72<br>(1 <sup>st</sup> , 2 <sup>nd</sup> , 3 <sup>rd</sup><br>thinning) and 134<br>(maturity)<br><u>post-emergence</u> ,<br>0, 7, 37 (1 <sup>st</sup> , 2 <sup>nd</sup> ,<br>3 <sup>rd</sup> thinning), 99<br>(maturity) |
|                                                                      |                     |              | Greenhouse<br>application:<br><u>pre-emergence</u> ,<br>1x 381-326 g<br>a.s./ha<br><u>post-emergence</u> ,<br>1x 88-92 g a.s./ha | Greenhouse<br>application:<br><u>pre-emergence</u> ,<br>19-23, 27-31 (1 <sup>st</sup><br>, 2 <sup>nd</sup> thinning),<br>100-132 (maturity)<br><u>post-emergence</u> , 7<br>(2 <sup>nd</sup> thinning) and<br>76-112 (maturity)                                                 |

<sup>4</sup> Regulation (EC) No 1272/2008 of the European Parliament and of the Council of 16 December 2008 on classification, labelling and packaging of substances and mixtures, amending and repealing Directives 67/548/EEC and 1999/45/EC, and amending Regulation (EC) No 1907/2006. OJ L 353, 31.12.2008, 1-1355.

<sup>5</sup> It should be noted that harmonised classification and labelling is formally proposed and decided in accordance with Regulation (EC) No 1272/2008. Proposals for classification made in the context of the evaluation procedure under Regulation (EC) No 1107/2009 are not formal proposals.

|                                                                                                     |                                                                                                                                                                                                                                                                                                                                                                                                                                                                                                                                                                                                                  |                |                                                                                                                                                       |                                                                                                                                                              |
|-----------------------------------------------------------------------------------------------------|------------------------------------------------------------------------------------------------------------------------------------------------------------------------------------------------------------------------------------------------------------------------------------------------------------------------------------------------------------------------------------------------------------------------------------------------------------------------------------------------------------------------------------------------------------------------------------------------------------------|----------------|-------------------------------------------------------------------------------------------------------------------------------------------------------|--------------------------------------------------------------------------------------------------------------------------------------------------------------|
|                                                                                                     |                                                                                                                                                                                                                                                                                                                                                                                                                                                                                                                                                                                                                  |                | Greenhouse application ( <sup>14</sup> C oxetanyl label):<br><u>pre-emergence</u> ,<br>1x 270 g a.s./ha<br><u>post-emergence</u> ,<br>1x 97 g a.s./ha |                                                                                                                                                              |
|                                                                                                     | Miscellaneous                                                                                                                                                                                                                                                                                                                                                                                                                                                                                                                                                                                                    |                |                                                                                                                                                       |                                                                                                                                                              |
|                                                                                                     | In the greenhouse metabolism studies only glucose and glutamine conjugates of the HO-pyrimidine amine (CGA-340355) were found at levels >10% TRR in soya beans equivalent to max. 0.012 mg/kg. In the field metabolism studies the predominant metabolites in soya bean foliage were glycerol ester of Oxasulfuron (CGA-310785), saccharin (CGA-27913) and sulfamoylbenzoic acid (CGA-177288). The highest residue was equivalent to 0.021 mg/kg. Only saccharin (CGA-27913) occurred at a level >10% TRR in mature beans but the actual concentration was very low (0.002 mg/kg).                               |                |                                                                                                                                                       |                                                                                                                                                              |
| <b>Rotational crops</b><br>(metabolic pattern)<br><b>OECD Guideline 502</b>                         | <b>Crop groups</b>                                                                                                                                                                                                                                                                                                                                                                                                                                                                                                                                                                                               | <b>Crop(s)</b> | <b>PBI (days)</b>                                                                                                                                     | <b>Comments</b>                                                                                                                                              |
|                                                                                                     | Root/tuber crops                                                                                                                                                                                                                                                                                                                                                                                                                                                                                                                                                                                                 | Turnip         | 35,120,383                                                                                                                                            | Metabolism studies conducted with a bare soil application at 188 g/ha with <sup>14</sup> C-phenyl and 168 g/ha with <sup>14</sup> C-pyrimidinyl oxasulfuron. |
|                                                                                                     | Leafy crops                                                                                                                                                                                                                                                                                                                                                                                                                                                                                                                                                                                                      | Mustard        | 35, 120, 383                                                                                                                                          |                                                                                                                                                              |
|                                                                                                     | Cereal (small grain)                                                                                                                                                                                                                                                                                                                                                                                                                                                                                                                                                                                             | Wheat          | 35, 120, 383                                                                                                                                          |                                                                                                                                                              |
|                                                                                                     | Pulses and oilseed                                                                                                                                                                                                                                                                                                                                                                                                                                                                                                                                                                                               | -              | -                                                                                                                                                     |                                                                                                                                                              |
| Rotational crop and primary crop metabolism similar?                                                | Open<br>Data gap: Since CGA 27913 and C 1801 were shown to be low to high persistent in soil (DT <sub>90</sub> of 28.8-788 and 10.8-1560 days, respectively), the potential for residues of these compounds to be present in the rotational crops needs to be investigated. Furthermore and pending upon the outcome of the requested DT <sub>50</sub> /DT <sub>90</sub> values on the metabolites CGA 171895 (M5), M3, CGA 179710, CGA 297691 and MT6 (data gaps in section 4), further rotational crops studies addressing the nature and magnitude of residues in regards to these compounds might be needed. |                |                                                                                                                                                       |                                                                                                                                                              |
| <b>Processed commodities</b><br>(standard hydrolysis study)<br><b>OECD Guideline 507</b>            | <b>Conditions</b>                                                                                                                                                                                                                                                                                                                                                                                                                                                                                                                                                                                                |                |                                                                                                                                                       |                                                                                                                                                              |
|                                                                                                     | 20 min, 90°C, pH 4                                                                                                                                                                                                                                                                                                                                                                                                                                                                                                                                                                                               |                |                                                                                                                                                       |                                                                                                                                                              |
|                                                                                                     | 60 min, 100°C, pH 5                                                                                                                                                                                                                                                                                                                                                                                                                                                                                                                                                                                              |                |                                                                                                                                                       |                                                                                                                                                              |
|                                                                                                     | 20 min, 120°C, pH 6                                                                                                                                                                                                                                                                                                                                                                                                                                                                                                                                                                                              |                |                                                                                                                                                       |                                                                                                                                                              |
| Residue pattern in processed commodities similar to residue pattern in raw commodities?             | Hydrolysis studies not triggered as oxasulfuron residues in soya beans <0.01 mg/kg (LOQ).                                                                                                                                                                                                                                                                                                                                                                                                                                                                                                                        |                |                                                                                                                                                       |                                                                                                                                                              |
| Plant residue definition for monitoring (RD-Mo)<br><b>OECD Guidance, series on pesticides No 31</b> | Oxasulfuron                                                                                                                                                                                                                                                                                                                                                                                                                                                                                                                                                                                                      |                |                                                                                                                                                       |                                                                                                                                                              |
| Plant residue definition for risk assessment (RD-RA)                                                | Oxasulfuron                                                                                                                                                                                                                                                                                                                                                                                                                                                                                                                                                                                                      |                |                                                                                                                                                       |                                                                                                                                                              |
| Conversion factor (monitoring to risk assessment)                                                   | None                                                                                                                                                                                                                                                                                                                                                                                                                                                                                                                                                                                                             |                |                                                                                                                                                       |                                                                                                                                                              |

### Metabolism in livestock (Regulation (EU) N° 283/2013, Annex Part A, points 6.2.2, 6.2.3, 6.2.4, 6.2.5 6.7.1)

| <b>OECD Guideline 503 and SANCO/11187/2013 rev. 3 (fish)</b> | <b>Animal</b> | <b>Dose</b><br>(mg/kg bw/d) | <b>Duration</b><br>(days) | <b>N</b><br><b>rate/comment</b> |
|--------------------------------------------------------------|---------------|-----------------------------|---------------------------|---------------------------------|
| <b>Animals covered</b>                                       | Laying hen    | 6.25                        | 8                         | 6250                            |

|                                                                                                                                                                                                                                                                                                                                                                                                                                          |              |   |               |
|------------------------------------------------------------------------------------------------------------------------------------------------------------------------------------------------------------------------------------------------------------------------------------------------------------------------------------------------------------------------------------------------------------------------------------------|--------------|---|---------------|
| Goat                                                                                                                                                                                                                                                                                                                                                                                                                                     | 3.27-3.54    | 4 | 3270-3910     |
| Pig                                                                                                                                                                                                                                                                                                                                                                                                                                      | -            | - | Not triggered |
| <p>The major pathways are the oxidation of one of the pyrimidinyl methyl groups to form HO-oxasulfuron (OH-CGA-277476), the hydrolysis of the oxetane ring to form the glycerol ester of HO-oxasulfuron (HO-CGA-310785), prior to sulfonylurea bridge cleavage and further transformation to saccharin (CGA 27913) and pyrimidine amine (C 1801).</p> <p>The metabolism pathways of oxasulfuron in rat and in ruminants are similar.</p> |              |   |               |
| Time needed to reach a plateau concentration in milk and eggs (days)                                                                                                                                                                                                                                                                                                                                                                     | Not provided |   |               |
| Animal residue definition for monitoring (RD-Mo)<br><a href="#">OECD Guidance, series on pesticides No 31</a>                                                                                                                                                                                                                                                                                                                            | Not required |   |               |
| Animal residue definition for risk assessment (RD-RA)                                                                                                                                                                                                                                                                                                                                                                                    | Not required |   |               |
| Conversion factor (monitoring to risk assessment)                                                                                                                                                                                                                                                                                                                                                                                        | None         |   |               |
| Metabolism in rat and ruminant similar (Yes/No)                                                                                                                                                                                                                                                                                                                                                                                          | Yes          |   |               |
| Fat soluble residues (Yes/No)<br><a href="#">(FAO, 2009)</a>                                                                                                                                                                                                                                                                                                                                                                             | No           |   |               |

#### Residues in succeeding crops (Regulation (EU) N° 283/2013, Annex Part A, point 6.6.2)

|                                                                                                      |                                                                                                                                                                                                                                                                                                                                                                                                                                                                                                                                                                                                          |
|------------------------------------------------------------------------------------------------------|----------------------------------------------------------------------------------------------------------------------------------------------------------------------------------------------------------------------------------------------------------------------------------------------------------------------------------------------------------------------------------------------------------------------------------------------------------------------------------------------------------------------------------------------------------------------------------------------------------|
| <b>Confined rotational crop study</b><br>(Quantitative aspect)<br><a href="#">OECD Guideline 502</a> | Data gap: Since CGA 27913 and C 1801 were shown to be low to high persistent in soil (DT <sub>90</sub> of 28.8-788 and 10.8-1560 days, respectively), the potential for residues of these compounds to be present in the rotational crops needs to be investigated. Furthermore and pending upon the outcome of the requested DT <sub>50</sub> /DT <sub>90</sub> values on the metabolites CGA 171895 (M5), M3, CGA 179710, CGA 297691 and MT6 (data gaps in section 4), further rotational crops studies addressing the nature and magnitude of residues in regards to these compounds might be needed. |
| <b>Field rotational crop study</b><br><a href="#">OECD Guideline 504</a>                             | Open                                                                                                                                                                                                                                                                                                                                                                                                                                                                                                                                                                                                     |

#### Stability of residues (Regulation (EU) N° 283/2013, Annex Part A, point 6.1)

##### [OECD Guideline 506](#)

| Plant products (Category) | Commodity | T (°C) | Stability (Months) |
|---------------------------|-----------|--------|--------------------|
|                           |           |        | Oxasulfuron        |
| High water content        |           |        |                    |
| High oil content          | Soya bean | -20    | 24                 |
| High protein content      |           |        |                    |
| High starch content       |           |        |                    |

|                   |  |  |  |
|-------------------|--|--|--|
| High acid content |  |  |  |
| Other             |  |  |  |

Storage stability of oxasulfuron (CGA-277476) was demonstrated for a period of 24 months at -20 °C in soybean seeds and processed fractions (meal, hulls, oil).

| Animal | Animal commodity | T (°C) | Stability (Months) |
|--------|------------------|--------|--------------------|
|        |                  |        | Oxasulfuron        |
| Beef   | Muscle           | -20    | 11                 |
|        | Liver            | -20    | 7                  |
|        | Kidney           |        |                    |
|        | Milk             | -20    | 10                 |
|        | Egg              | -20    | 12                 |



## Summary of residues data from the supervised residue trials (Regulation (EU) N° 283/2013, Annex Part A, point 6.3) **OECD Guideline 509, OECD Guidance, series on pesticides No 66 and OECD MRL calculator**

| Crop                                                  | Region/<br>Indoor<br>(a) | Residue levels (mg/kg) observed in the supervised residue trials relevant to the supported GAPs (b) | Recommendations/comments (OECD calculations) | MRL proposals (mg/kg) | HR (mg/kg) (c) | STMR (mg/kg) (d) |
|-------------------------------------------------------|--------------------------|-----------------------------------------------------------------------------------------------------|----------------------------------------------|-----------------------|----------------|------------------|
| <b>Representative uses</b>                            |                          |                                                                                                     |                                              |                       |                |                  |
| <b>Residue definition for monitoring:</b> Oxasulfuron |                          |                                                                                                     |                                              |                       |                |                  |
| Soyabean                                              | SEU                      | 7x <0.01                                                                                            | MRL <sub>OECD</sub> : 0.01 mg/kg             | 0.01(*)               | 0.01           | 0.01             |

### MRL application

Not relevant

### Summary of the data on formulation equivalence **OECD Guideline 509**

| Crop                                   | Region | Residue data (mg/kg) | Recommendations/comments |  |  |  |
|----------------------------------------|--------|----------------------|--------------------------|--|--|--|
| No information provided - Not relevant |        |                      |                          |  |  |  |

### Summary of data on residues in pollen and bee products (Regulation (EU) No 283/2013, Annex Part A, point 6.10.1)

| Product(s)              | Region | Residue data (mg/kg) | Recommendations/comments |  |  |  |
|-------------------------|--------|----------------------|--------------------------|--|--|--|
| No information provided |        |                      |                          |  |  |  |

No information provided

Data gap: The determination of the residues in pollen and bee products for human consumption resulting from residues taken up by honeybees from crops at blossom with regards to oxasulfuron and relevant metabolites and considering also the outstanding data on rotational crops is requested.

- (a): **NEU** or **SEU** for northern or southern **outdoor** trials in EU member states (**N+SEU** if both zones), **Indoor** for glasshouse/protected crops, **Country** if non-EU location.
- (b): Residue levels in trials conducted according to GAP reported in ascending order (*e.g.* 3x <0.01, 0.01, 6x 0.02, 0.04, 0.08, 3x 0.10, 2x 0.15, 0.17). When residue definition for monitoring and risk assessment differs, use **Mo/RA** to differentiate data expressed according to the residue definition for **Monitoring** and **Risk Assessment**.
- (c): **HR**: Highest residue. When residue definition for monitoring and risk assessment differs, HR according to residue definition for monitoring reported in brackets (HR<sub>Mo</sub>).
- (d): **STMR**: Supervised Trials Median Residue. When residue definition for monitoring and risk assessment differs, STMR according to definition for monitoring reported in brackets (STMR<sub>Mo</sub>).

**Inputs for animal burden calculations**

| Feed commodity             | Median dietary burden |         | Maximum dietary burden |         |
|----------------------------|-----------------------|---------|------------------------|---------|
|                            | (mg/kg)               | Comment | (mg/kg)                | Comment |
| <b>Representative uses</b> |                       |         |                        |         |
| Soybean seed               | 0.01                  | STMR    | 0.01                   | STMR    |
| Soybean meal               | 0.01                  | STMR    | 0.01                   | STMR    |
| Soybean hulls              | 0.01                  | STMR    | 0.01                   | STMR    |
| <b>MRL application</b>     |                       |         |                        |         |
| Not relevant               |                       |         |                        |         |

**Residues from livestock feeding studies (Regulation (EU) N° 283/2013, Annex Part A, points 6.4.1, 6.4.2, 6.4.3 and 6.4.4)**  
**OECD Guideline 505 and OECD Guidance, series on pesticides No 73**

| MRL calculations                                                                       | Ruminant                          |                      |                                   |                      | Pig/Swine                         |                        | Poultry                           |                       | Fish                              |                      |
|----------------------------------------------------------------------------------------|-----------------------------------|----------------------|-----------------------------------|----------------------|-----------------------------------|------------------------|-----------------------------------|-----------------------|-----------------------------------|----------------------|
| <b>Highest expected intake</b><br>(mg/kg bw/d)<br>(mg/kg DM for fish)                  | Beef cattle                       | 0.0001               | Ram/Ewe                           | 0.0001               | Breeding                          | 0.0001                 | Broiler                           | 0.0005                | Carp                              | -                    |
|                                                                                        | Dairy cattle                      | 0.0001               | Lamb                              | 0.0002               | Finishing                         | 0.0002                 | Layer                             | 0.0003                | Trout                             | -                    |
|                                                                                        |                                   |                      |                                   |                      |                                   |                        | Turkey                            | 0.0005                | Fish intake >0.1 mg/kg DM         |                      |
| Intake >0.004 mg/kg bw                                                                 | No                                |                      | No                                |                      | No                                |                        | No                                |                       | No                                |                      |
| Feeding study submitted                                                                | Not required                      |                      | Not required                      |                      | Not required                      |                        | Not required                      |                       | Not required                      |                      |
| <b>Representative feeding level</b> (mg/kg bw/d, mg/kg DM for fish) and <b>N rates</b> | Level                             | Beef: N<br>Dairy: N  | Level                             | Lamb: N<br>Ewe: N    | Level                             | N rate<br>Breed/Finish | Level                             | B or T: N<br>Layer: N | Level                             | N rate<br>Carp/Trout |
|                                                                                        | Estimated HR <sup>(a)</sup> at 1N | <b>MRL</b> proposals | Estimated HR <sup>(a)</sup> at 1N | <b>MRL</b> proposals | Estimated HR <sup>(a)</sup> at 1N | <b>MRL</b> proposals   | Estimated HR <sup>(a)</sup> at 1N | <b>MRL</b> proposals  | Estimated HR <sup>(a)</sup> at 1N | <b>MRL</b> proposals |
| Muscle                                                                                 |                                   |                      |                                   |                      |                                   |                        |                                   |                       |                                   |                      |
| Fat                                                                                    |                                   |                      |                                   |                      |                                   |                        |                                   |                       |                                   |                      |
| Meat <sup>(b)</sup>                                                                    |                                   |                      |                                   |                      |                                   |                        |                                   |                       |                                   |                      |
| Liver                                                                                  |                                   |                      |                                   |                      |                                   |                        |                                   |                       |                                   |                      |
| Kidney                                                                                 |                                   |                      |                                   |                      |                                   |                        |                                   |                       |                                   |                      |
| Milk <sup>(a)</sup>                                                                    |                                   |                      |                                   |                      |                                   |                        |                                   |                       |                                   |                      |
| Eggs                                                                                   |                                   |                      |                                   |                      |                                   |                        |                                   |                       |                                   |                      |
| Method of calculation <sup>(c)</sup>                                                   |                                   |                      |                                   |                      |                                   |                        |                                   |                       |                                   |                      |

<sup>(a)</sup>: Estimated HR calculated at 1N level (**estimated mean level for milk**).

<sup>(b)</sup>: HR in meat calculated for mammalian on the basis of 20% fat + 80% muscle and 10% fat + 90% muscle for poultry

<sup>(c)</sup>: The OECD guidance document on residues in livestock (series on pesticides 73) recommends three different approaches to derive MRLs for animal products; by applying a transfer factor (Tf), by intrapolation (It) or by linear regression (Ln). Fill in method(s) considered to derive the MRL proposals.

## Conversion Factors (CF) for monitoring to risk assessment

### Animal products

Not relevant (RD-Mo = RD-RA)

### Plant products

Not relevant (RD-Mo = RD-RA)

## Processing factors (Regulation (EU) N° 283/2013, Annex Part A, points 6.5.2 and 6.5.3) OECD Guideline 508 and OECD Guidance, series on testing and assessment No 96

| Crop (RAC)/Edible part or<br>Crop (RAC)/Processed product | Number<br>of<br>studies <sup>(a)</sup> | Processing Factor (PF) |           | Conversion<br>Factor (CF <sub>p</sub> )<br>for RA <sup>(b)</sup> |
|-----------------------------------------------------------|----------------------------------------|------------------------|-----------|------------------------------------------------------------------|
|                                                           |                                        | Individual values      | Median PF |                                                                  |

### Representative Uses

Processing residue trials are not triggered.

<sup>(a)</sup>: Studies with residues in the RAC at or close to the LOQ should be disregarded (unless concentration)

<sup>(b)</sup>: When the residue definition for risk assessment differs from the residue definition for monitoring

## Consumer risk assessment (Regulation (EU) N° 283/2013, Annex Part A, point 6.9) Including all uses (representative uses and uses related to an MRL application).

### ADI

TMDI according to EFSA PRIMo

NTMDI, according to (to be specified)

IEDI (% ADI), according to EFSA PRIMo

NEDI (% ADI), according to (to be specified)

Factors included in the calculations

### ARfD

IESTI (% ARfD), according to EFSA PRIMo

NESTI (% ARfD), according to (to be specified)

Factors included in IESTI and NESTI

0.013 mg/kg bw per day

Not relevant

Not provided, not required

Not provided, not required

Not provided, not required

None

Not allocated

-

-

-

## Consumer risk assessment limited to the representative uses<sup>(1)</sup>

TMDI (% ADI), according to EFSA PRIMo

NTMDI (% ADI), according to (to be specified)

IEDI (% ADI), according to EFSA PRIMo

NEDI (% ADI), according to (to be specified)

Factors included in the calculations

IESTI (% ARfD, according to EFSA PRIMo)

NESTI (% ARfD, according to (to be specified)

Factors included in IESTI and NESTI

Highest TMDI: <1% of the ADI (WHO cluster diet F)

Not provided, not required

Not provided, not required

Not provided, not required

None

Not provided, not required

Not provided, not required

None

### Additional contribution to the consumer intakes through drinking water resulting from groundwater metabolite expected to be present above 0.75 µg/L<sup>(1)</sup>

|                                           |                                                                          |
|-------------------------------------------|--------------------------------------------------------------------------|
| Metabolite                                | CGA 297691                                                               |
| ADI (mg/kg bw per day)                    | 0.05                                                                     |
| Intake of groundwater metabolites (% ADI) | Adult (60 kg bw, 2 L): 0.2 % ADI                                         |
| WHO Guideline (WHO, 2011)                 | Child (10 kg bw, 1 L): 0.6 % ADI<br>Infant ( 5 kg bw, 0.75 L): 0.9 % ADI |

<sup>(1)</sup>: The overall consumer exposure assessment cannot be finalised in view of the identified data gap for the potential for residues of CGA 27913 and C 1801 to be present in the rotational crops, the outstanding data regarding the metabolism and magnitude of the relevant compounds in rotational crops (see section 4) and the consumer exposure assessment through drinking water with regards to MT6, CGA 171895 (M5) and M3.

### Proposed MRLs (Regulation (EU) No 283/2013, Annex Part A, points 6.7.2 and 6.7.3)

| Code <sup>(a)</sup>        | Commodity/Group | MRL/Import tolerance <sup>(b)</sup> ( mg/kg) and Comments |                             |
|----------------------------|-----------------|-----------------------------------------------------------|-----------------------------|
| <b>Plant commodities</b>   |                 |                                                           |                             |
| <b>Representative uses</b> |                 |                                                           |                             |
| 0401070                    | Soyabeans       | 0.01(*)                                                   | Current MRL Reg EU 289/2014 |

(a): Commodity code number, as listed in Annex I of Regulation (EC) No 396/2005

(b): MRLs proposed at the LOQ, should be annotated by an asterisk (\*) after the figure

### Environmental fate and behaviour

#### Route of degradation (aerobic) in soil (Regulation (EU) N° 283/2013, Annex Part A, point 7.1.1.1)

|                                                                                                     |                                                                                                                                                                                                                                                                                                                                                                                                                                                                                                                                                                                |
|-----------------------------------------------------------------------------------------------------|--------------------------------------------------------------------------------------------------------------------------------------------------------------------------------------------------------------------------------------------------------------------------------------------------------------------------------------------------------------------------------------------------------------------------------------------------------------------------------------------------------------------------------------------------------------------------------|
| Mineralisation after 100 days                                                                       | 0.1-57.4 % after 90-105 d, [ <sup>14</sup> C-phenyl]-label (n=4)<br>1.3-21.3 % after 90-83 d, [ <sup>14</sup> C-pyrimidinyl]-label (n=3)<br>80.4 % after 120 d, [ <sup>14</sup> C-oxetan]-label (n=1)                                                                                                                                                                                                                                                                                                                                                                          |
| Non-extractable residues after 100 days                                                             | 1.7-27 % after 90-105 d, [ <sup>14</sup> C-phenyl]-label (n= 4)<br>25.5-53.9 % after 90-83 d, [ <sup>14</sup> C-pyrimidinyl]-label (n=3)<br>5.3 % after 120 d, [ <sup>14</sup> C-oxetan]-label (n=1)                                                                                                                                                                                                                                                                                                                                                                           |
| Metabolites requiring further consideration<br>- name and/or code, % of applied (range and maximum) | saccharin CGA (27913) – 9-98.5 % at 9-90 d (n=9)<br>[ <sup>14</sup> C-phenyl]-label<br><br>M3 – 4.8-25 % at 0-65 d (n=6)<br>[ <sup>14</sup> C-phenyl] & [ <sup>14</sup> C-pyrimidinyl] and [ <sup>14</sup> C-oxetan]-label<br><br>M5 – 5.4-10.2 % at 9-2 d (n=2)<br>[ <sup>14</sup> C-phenyl]-label<br><br>C1801 – 29.2-54.7 % at 5-14 d (n=4)<br>[ <sup>14</sup> C-pyrimidinyl]-label<br><br>CGA 179710 – 1.3-27.5 % at 7-14 d (n=2)<br>[ <sup>14</sup> C-pyrimidinyl]-label<br><br>CGA 297691 – about 21 % at 4 d (n=1)<br>[ <sup>14</sup> C-oxetan]-label, field study only |

### Route of degradation (anaerobic) in soil (Regulation (EU) N° 283/2013, Annex Part A, point 7.1.1.2)

|                                                                                                                             |                                                                                                                                                                                                                                                                                                                                |
|-----------------------------------------------------------------------------------------------------------------------------|--------------------------------------------------------------------------------------------------------------------------------------------------------------------------------------------------------------------------------------------------------------------------------------------------------------------------------|
| Mineralisation after 100 days                                                                                               | 0.2-0.3 % at 90-120 d, [ <sup>14</sup> C-phenyl]-label (n=2)<br>1.1-15.6 % at 90-127 d, [ <sup>14</sup> C-pyrimidinyl]-label (n=2)<br>6.6 % at 90 d, [ <sup>14</sup> C-oxetan]-label (n=1)                                                                                                                                     |
| Non-extractable residues after 100 days                                                                                     | 3-3.6 % at 90-120 d, [ <sup>14</sup> C-phenyl]-label (n=2)<br>19.3-50.1 % at 90-127 d, [ <sup>14</sup> C-pyrimidinyl]-label (n=2)<br>20.2 % at 90 d, [ <sup>14</sup> C-oxetan]-label (n=1)                                                                                                                                     |
| Metabolites that may require further consideration for risk assessment - name and/or code, % of applied (range and maximum) | saccharin (CGA 27913) – 86.5-96.8 % at 120-59 d (n=2)<br>[ <sup>14</sup> C-phenyl]-label<br><br>M3 – 30.2 % at 40 d (n=1)<br>[ <sup>14</sup> C-pyrimidinyl]-label<br><br>C1801 – 22.7-69 % at 8-59 d (n=2)<br>[ <sup>14</sup> C-pyrimidinyl]-label<br><br>CGA 297691 – 87.8 % at 62 d (n=1)<br>[ <sup>14</sup> C-oxetan]-label |

### Route of degradation (photolysis) on soil (Regulation (EU) N° 283/2013, Annex Part A, point 7.1.1.3)

|                                                                                                                             |                                                                                                                                                                                                                                         |
|-----------------------------------------------------------------------------------------------------------------------------|-----------------------------------------------------------------------------------------------------------------------------------------------------------------------------------------------------------------------------------------|
| Metabolites that may require further consideration for risk assessment - name and/or code, % of applied (range and maximum) | saccharin (CGA 27913) – 90.5 % at 30 d (n=1)<br>[ <sup>14</sup> C-phenyl]-label<br><br>CGA 297691 – 58.8 % at 30 d (n=1)<br>[ <sup>14</sup> C-oxetan]-label<br><br>C1801 – 51.5 % at 30 d (n=1)<br>[ <sup>14</sup> C-pyrimidinyl]-label |
| Mineralisation at study end                                                                                                 | 0.2 % at 30 d, [ <sup>14</sup> C-phenyl]-label (n=1)<br>0.4 % at 30 d, [ <sup>14</sup> C-pyrimidinyl]-label (n=1)<br>16.3 % at 30 d, [ <sup>14</sup> C-oxetan]-label (n=1)                                                              |
| Non-extractable residues at study end                                                                                       | 0.4 % at 30 d, [ <sup>14</sup> C-phenyl]-label (n=1)<br>5.5 % at 30 d, [ <sup>14</sup> C-pyrimidinyl]-label (n=1)<br>7.5 % at 30 d, [ <sup>14</sup> C-oxetan]-label (n=1)                                                               |

**Rate of degradation in soil (aerobic) laboratory studies active substance (Regulation (EU) N° 283/2013, Annex Part A, point 7.1.2.1.1 and Regulation (EU) N° 284/2013, Annex Part A, point 9.1.1.1)**

| Oxasulfuron                          |           |          | Dark aerobic conditions                  |                |                                          |                       |                                                     |                               |                         |
|--------------------------------------|-----------|----------|------------------------------------------|----------------|------------------------------------------|-----------------------|-----------------------------------------------------|-------------------------------|-------------------------|
|                                      | Soil type | O.C. (%) | pH <sup>a</sup> )                        | t. °C / % MWHC | DT <sub>50</sub> /DT <sub>90</sub> (d) # | St. (X <sup>2</sup> ) | DT <sub>50</sub> (d) 20 °C pF2/10kPa <sup>b</sup> ) | St. (X <sup>2</sup> )         | Method of calculation § |
| Gartenacker, Silt loam               | 2.3       | 7.2      | 20°C/40%                                 | 8.4/27.9 SFO   | 3                                        | 8.4                   | 3                                                   | SFO                           |                         |
| Speyer 2.2, Loamy sand               | 2.2       | 5.7      | 20°C/40%                                 | 29.3/97.3 SFO  | 6.9                                      | 29.3                  | 6.9                                                 | SFO                           |                         |
| Weide, Sandy loam                    | 1.3       | 7.6      | 20°C/40%                                 | 11.6/51 FOMC   | 3.1                                      | 15.4                  | 3.1                                                 | FOMC (DT <sub>90</sub> /3.32) |                         |
| Gartenacker, Silt loam               | 2.1       | 7.2      | 19.8°C/75% of field capacity             | 5.7/18.9 SFO   | 3.5                                      | 4.6                   | 3.5                                                 | SFO                           |                         |
| Collombey, Loamy sand                | 1.6       | 7.4      | 19.8°C/75% of field capacity             | 6.7/35.5 FOMC  | 2.5                                      | 8.6                   | 2.5                                                 | FOMC (DT <sub>90</sub> /3.32) |                         |
| USA, Sandy loam a                    | 1.1       | 6.8      | 25°C/75% of field capacity at 0.33 bar   | 4.2/14 SFO     | 6.1                                      | 5.5                   | 6.1                                                 | SFO                           |                         |
| USA, Sandy loam b                    | 1.1       | 6.8      | 25°C/75% of field capacity at 0.33 bar   | 3.2/10.6 SFO   | 9.9                                      | 4.2                   | 9.9                                                 | SFO                           |                         |
| USA, Sandy loam c                    | 1.5       | 7        | 25.5°C/75% of field capacity at 0.33 bar | 3.7/20.1 FOMC  | 6.7                                      | 8.3                   | 6.7                                                 | FOMC (DT <sub>90</sub> /3.32) |                         |
| USA, Sandy loam d                    | 1         | 7.5      | 25°C/75% of field capacity at 0.33 bar   | 7.2/24 SFO     | 1.4                                      | 9.5                   | 1.4                                                 | SFO                           |                         |
| USA, Sandy loam e                    | 1         | 7.5      | 25°C/75% of field capacity at 0.33 bar   | 8.3/27.5 SFO   | 3.7                                      | 10.9                  | 3.7                                                 | SFO                           |                         |
| USA, Sand                            | 0.5       | 8.3      | 25°C/75% of field capacity at 0.33 bar   | 10/33.3 SFO    | 3.3                                      | 13.1                  | 3.3                                                 | SFO                           |                         |
| USA, Loam                            | 1.4       | 6.7      | 25°C/75% of field capacity at 0.33 bar   | 9/29.9 SFO     | 3                                        | 11.8                  | 3                                                   | SFO                           |                         |
| USA, Clay                            | 1.2       | 7.3      | 25°C/75% of field capacity at 0.33 bar   | 7.4/24.7 SFO   | 2.9                                      | 9.7                   | 2.9                                                 | SFO                           |                         |
| Geometric mean (if not pH dependent) |           |          |                                          |                |                                          |                       | 9.4                                                 |                               |                         |
| pH dependence, No                    |           |          |                                          |                |                                          |                       |                                                     |                               |                         |

<sup>a</sup>) Measured in water

<sup>b</sup>) Normalised using a Q10 of 2.58 and Walker equation coefficient of 0.7

# Non-normalised for trigger evaluation

§ For modelling purposes

**Rate of degradation in soil (aerobic) laboratory studies transformation products (Regulation (EU) N° 283/2013, Annex Part A, point 7.1.2.1.2 and Regulation (EU) N° 284/2013, Annex Part A, point 9.1.1.1)**

| <b>Saccharin (CGA 27913)</b>          |          | <b>Dark aerobic conditions Oxasulfuron dosed from which the f.f. was derived was 0.6</b> |                |                                           |                                        |                       |                                                     |                       |                               |
|---------------------------------------|----------|------------------------------------------------------------------------------------------|----------------|-------------------------------------------|----------------------------------------|-----------------------|-----------------------------------------------------|-----------------------|-------------------------------|
| Soil type                             | O.C. (%) | pH <sup>a)</sup>                                                                         | t. °C / % MWHC | DT <sub>50</sub> / DT <sub>90</sub> (d) # | f. f. k <sub>f</sub> / k <sub>dp</sub> | St. (X <sup>2</sup> ) | DT <sub>50</sub> (d) 20 °C pF2/10kP a <sup>b)</sup> | St. (X <sup>2</sup> ) | Method of calculation §       |
| Gartenacker, Silt loam                | 2.3      | 7.2                                                                                      | 20°C/40 %      | 12.5/111 DFOP (decline phase)             | 1*                                     | 12.9                  | 48                                                  | 23.7                  | FOMC (DT <sub>90</sub> /3.32) |
| Speyer 2.2, Loamy sand                | 2.2      | 5.7                                                                                      | 20°C/40 %      | 8.7/28.8 SFO+SFO                          | 0.59                                   | 23.8                  | 8.7                                                 | 23.8                  | SFO+SFO                       |
| Weide, Sandy loam                     | 1.3      | 7.6                                                                                      | 20°C/40 %      | 4.6/26.1 FOMC (decline phase)             | 1*                                     | 2.6                   | 7.9                                                 | 2.6                   | FOMC (DT <sub>90</sub> /3.32) |
| Sandy loam <sup>§</sup>               | -        | 5.7                                                                                      | 20°C/50 %      | 80.7/269                                  | -                                      | -                     | 80.7                                                | 2                     | SFO                           |
| Silt loam-1 <sup>§</sup>              | -        | 7.7                                                                                      | 20°C/50 %      | 34.8/116                                  | -                                      | -                     | 34.8                                                | 10                    | SFO                           |
| Silt loam-2 <sup>§</sup>              | -        | 6.4                                                                                      | 20°C/50 %      | 119/661                                   | -                                      | -                     | 119                                                 | 5                     | SFO                           |
| Mattapex, silt loam <sup>§</sup>      | -        | 6.9                                                                                      | 20°C           | 237.4/788.6                               | -                                      | -                     | 237.4                                               | 4                     | SFO                           |
| Speyer 2.2, loamy sand-1 <sup>§</sup> | -        | 5.7                                                                                      | 20°C           | 9.69/32.2                                 | -                                      | -                     | 9.69                                                | 4.76                  | Modified HS                   |
| Speyer 3A, sandy loam-1 <sup>§</sup>  | -        | 7.3                                                                                      | 20°C           | 10.2/34                                   | -                                      | -                     | 9.53                                                | 5.32                  | Modified HS                   |
| Speyer 65, clay-1 <sup>§</sup>        | -        | 7.1                                                                                      | 20°C           | 29.9/99.2                                 | -                                      | -                     | 20.6                                                | 5.75                  | Modified HS                   |
| Speyer 2.2, loamy sand-2 <sup>§</sup> | -        | 5.7                                                                                      | 20°C           | 14.8/49.2                                 | -                                      | -                     | 14.8                                                | -                     | SFO                           |
| Speyer 3A, sandy loam-2 <sup>§</sup>  | -        | 6.88                                                                                     | 20°C           | 9.1/30.1                                  | -                                      | -                     | 8.45                                                | -                     | SFO                           |
| Speyer 65, clay-2 <sup>§</sup>        | -        | 7.23                                                                                     | 20°C           | 27.5/91.2                                 | -                                      | -                     | 20.47                                               | -                     | SFO                           |
| Geometric mean (if not pH dependent)  |          |                                                                                          |                |                                           |                                        |                       | 24.7                                                |                       |                               |
| Arithmetic mean                       |          |                                                                                          |                |                                           | 0.86                                   |                       |                                                     |                       |                               |
| pH dependence, No                     |          |                                                                                          |                |                                           |                                        |                       |                                                     |                       |                               |

<sup>a)</sup> Measured in water

<sup>b)</sup> Normalised using a Q10 of 2.58 and Walker equation coefficient of 0.7

# Non-normalised for trigger evaluation

§ For modelling purposes

\* A worst-case value of 1 has been selected because no acceptable fit could be derived by modelling parent and metabolite together, therefore a suitable estimation of the formation fraction could not be achieved.

§ These values were contained in the endpoints lists from the published finalised EFSA conclusions for the a.s. metsulfuron-methyl <https://www.efsa.europa.eu/it/efsajournal/pub/3936> and ethametsulfuron-methyl <https://www.efsa.europa.eu/it/efsajournal/pub/3508>



| <b>M3</b>                            |          | <b>Dark aerobic conditions Oxasulfuron dosed from which the f.f. was derived was 0.25</b> |                |                                           |                                        |                       |                                                    |                       |                         |
|--------------------------------------|----------|-------------------------------------------------------------------------------------------|----------------|-------------------------------------------|----------------------------------------|-----------------------|----------------------------------------------------|-----------------------|-------------------------|
| Soil type                            | O.C. (%) | pH <sup>a)</sup>                                                                          | t. °C / % MWHC | DT <sub>50</sub> / DT <sub>90</sub> (d) # | f. f. k <sub>f</sub> / k <sub>dp</sub> | St. (X <sup>2</sup> ) | DT <sub>50</sub> (d) 20 °C pF2/10kPa <sup>b)</sup> | St. (X <sup>2</sup> ) | Method of calculation § |
| Gartenacker, Silt loam               | 2.3      | 7.2                                                                                       | 20°C/40%       | 122/406 SFO+SFO                           | 0.25                                   | 20.7                  | 122                                                | 53.2                  | SFO+SFO                 |
| Geometric mean (if not pH dependent) |          |                                                                                           |                |                                           |                                        |                       | 122                                                |                       |                         |
| Arithmetic mean                      |          |                                                                                           |                |                                           | 0.25                                   |                       |                                                    |                       |                         |
| pH dependence, No                    |          |                                                                                           |                |                                           |                                        |                       |                                                    |                       |                         |

<sup>e)</sup> Measured in water

<sup>f)</sup> Normalised using a Q10 of 2.58 and Walker equation coefficient of 0.7

# Non-normalised for trigger evaluation

§ For modelling purposes

| <b>M5 (CGA 171895)</b>               |          | <b>Dark aerobic conditions Oxasulfuron dosed from which the f.f. was derived was 1</b> |                |                                           |                                        |                       |                                                    |                       |                               |
|--------------------------------------|----------|----------------------------------------------------------------------------------------|----------------|-------------------------------------------|----------------------------------------|-----------------------|----------------------------------------------------|-----------------------|-------------------------------|
| Soil type                            | O.C. (%) | pH <sup>a)</sup>                                                                       | t. °C / % MWHC | DT <sub>50</sub> / DT <sub>90</sub> (d) # | f. f. k <sub>f</sub> / k <sub>dp</sub> | St. (X <sup>2</sup> ) | DT <sub>50</sub> (d) 20 °C pF2/10kPa <sup>b)</sup> | St. (X <sup>2</sup> ) | Method of calculation §       |
| Speyer 2.2, Loamy sand               | 2.2      | 5.7                                                                                    | 20°C/40%       | 12.7/321 HS (decline phase)               | 1*                                     | 18.3                  | 154                                                | 18.3                  | HS-K2 after lag phase         |
| Weide, Sandy loam                    | 1.3      | 7.6                                                                                    | 20°C/40%       | 7.4/59.1 FOMC (decline phase)             | 1*                                     | 19.1                  | 17.8                                               | 19.1                  | FOMC (DT <sub>90</sub> /3.32) |
| Geometric mean (if not pH dependent) |          |                                                                                        |                |                                           |                                        |                       | 52.4                                               |                       |                               |
| Arithmetic mean                      |          |                                                                                        |                |                                           | 1                                      |                       |                                                    |                       |                               |
| pH dependence, No                    |          |                                                                                        |                |                                           |                                        |                       |                                                    |                       |                               |

<sup>g)</sup> Measured in water

<sup>h)</sup> Normalised using a Q10 of 2.58 and Walker equation coefficient of 0.7

# Non-normalised for trigger evaluation

§ For modelling purposes

\* A worst-case value of 1 has been selected because no acceptable fit could be derived by modelling parent and metabolite together, therefore a suitable estimation of the formation fraction could not be achieved.

| <b>C1801</b>           |          | <b>Dark aerobic conditions Oxasulfuron dosed from which the f.f. was derived was 0.6</b> |                              |                                           |                                        |                       |                                                    |                       |                         |
|------------------------|----------|------------------------------------------------------------------------------------------|------------------------------|-------------------------------------------|----------------------------------------|-----------------------|----------------------------------------------------|-----------------------|-------------------------|
| Soil type              | O.C. (%) | pH <sup>a)</sup>                                                                         | t. °C / % MWHC               | DT <sub>50</sub> / DT <sub>90</sub> (d) # | f. f. k <sub>f</sub> / k <sub>dp</sub> | St. (X <sup>2</sup> ) | DT <sub>50</sub> (d) 20 °C pF2/10kPa <sup>b)</sup> | St. (X <sup>2</sup> ) | Method of calculation § |
| Gartenacker, Silt loam | 2.1      | 7.2                                                                                      | 19.8°C/75% of field capacity | 3.2/10.8 SFO+SFO                          | 0.3                                    | 10.8                  | 2.6                                                | 10.8                  | SFO+SFO                 |
| Collombey,             | 1.6      | 7.4                                                                                      | 19.8°C/75%                   | 14.8/49.2                                 | 0.8                                    | 10.                   | 11.8                                               | 10.4                  | FOMC+SFO                |

|                                      |     |     |                                        |                  |      |      |       |      |         |
|--------------------------------------|-----|-----|----------------------------------------|------------------|------|------|-------|------|---------|
| Loamy sand                           |     |     | of field capacity                      | FOMC+SF<br>O     |      | 4    |       |      |         |
| USA, Sandy loam b                    | 1.1 | 6.8 | 25°C/75% of field capacity at 0.33 bar | 468/1560 SFO+SFO | 0.61 | 11.5 | 611.2 | 11.5 | SFO+SFO |
| Geometric mean (if not pH dependent) |     |     |                                        |                  |      |      | 26.6  |      |         |
| Arithmetic mean                      |     |     |                                        |                  | 0.57 |      |       |      |         |
| pH dependence, No                    |     |     |                                        |                  |      |      |       |      |         |

<sup>1)</sup> Measured in water

<sup>1)</sup> Normalised using a Q10 of 2.58 and Walker equation coefficient of 0.7

# Non-normalised for trigger evaluation

§ For modelling purposes

| <b>CGA 179710</b>                    |         | <b>Dark aerobic conditions Oxasulfuron dosed from which the f.f. was derived was 0.3</b> |                                        |                                           |                                        |                       |                                                    |                       |                         |
|--------------------------------------|---------|------------------------------------------------------------------------------------------|----------------------------------------|-------------------------------------------|----------------------------------------|-----------------------|----------------------------------------------------|-----------------------|-------------------------|
| Soil type                            | O.C (%) | pH <sup>a)</sup>                                                                         | t. °C / % MWHC                         | DT <sub>50</sub> / DT <sub>90</sub> (d) # | f. f. k <sub>f</sub> / k <sub>dp</sub> | St. (X <sup>2</sup> ) | DT <sub>50</sub> (d) 20 °C pF2/10kPa <sup>b)</sup> | St. (X <sup>2</sup> ) | Method of calculation § |
| USA, Sandy loam b                    | 1.1     | 6.8                                                                                      | 25°C/75% of field capacity at 0.33 bar | 298/989 SFO+SFO                           | 0.3                                    | 10.8                  | 389.2                                              | 10.8                  | SFO+SFO                 |
| Geometric mean (if not pH dependent) |         |                                                                                          |                                        |                                           |                                        |                       | 389.2                                              |                       |                         |
| Arithmetic mean                      |         |                                                                                          |                                        |                                           | 0.3                                    |                       |                                                    |                       |                         |
| pH dependence, No                    |         |                                                                                          |                                        |                                           |                                        |                       |                                                    |                       |                         |

<sup>k)</sup> Measured in water

<sup>1)</sup> Normalised using a Q10 of 2.58 and Walker equation coefficient of 0.7

# Non-normalised for trigger evaluation

§ For modelling purposes

|            |          |
|------------|----------|
| <b>MT6</b> | Data gap |
|------------|----------|

### Rate of degradation field soil dissipation studies (Regulation (EU) N° 283/2013, Annex Part A, point 7.1.2.2.1 and Regulation (EU) N° 284/2013, Annex Part A, point 9.1.1.2.1)

| <b>Oxasulfuron</b>                   | <b>Aerobic conditions</b>                              |                                  |          |                  |            |                             |                             |       |                                         |
|--------------------------------------|--------------------------------------------------------|----------------------------------|----------|------------------|------------|-----------------------------|-----------------------------|-------|-----------------------------------------|
|                                      | Soil type (indicate if bare or cropped soil was used). | Location (country or USA state). | O.M. (%) | pH <sup>a)</sup> | Depth (cm) | DT <sub>50</sub> (d) actual | DT <sub>90</sub> (d) actual | C.C.* | DT <sub>50</sub> (d) Norm <sup>b)</sup> |
| Dewey, bare soil                     | Illinois                                               | 3.4                              | 6.1      | 7.5              | 3.2        | n.c.                        | 0.989                       | n.c.  | Regression analysis                     |
| Loamy sand/sandy loam, cropped soil  | North Carolina                                         | < 1                              | 5-6      | 15               | 5.9        | n.c.                        | 0.916                       | n.c.  | Regression analysis                     |
| Geometric mean (if not pH dependent) |                                                        |                                  |          |                  | 4.3        |                             |                             |       |                                         |
| pH dependence, No                    |                                                        |                                  |          |                  |            |                             |                             |       |                                         |

<sup>a)</sup> Measured in unknown medium

<sup>b)</sup> Normalised using a Q10 of 2.58 and Walker equation coefficient of 0.7, values are DegT50matrix

\* Correlation coefficient

n.c. Not calculated

### Combined laboratory and field kinetic endpoints for modelling (when not from different populations)\*

Rate of degradation in soil active substance, normalised geometric mean (if not pH dependent)

Not relevant, since field data are not suitable for modelling purposes

Rate of degradation in soil transformation products, normalised geometric mean (if not pH dependent)

Not relevant

Kinetic formation fraction (f. f.  $k_f / k_{dp}$ ) of transformation products, arithmetic mean

Not relevant

\* Only relevant after implementation of the published EFSA guidance describing how to amalgamate laboratory and field endpoints.

### Soil accumulation (Regulation (EU) N° 283/2013, Annex Part A, point 7.1.2.2.2 and Regulation (EU) N° 284/2013, Annex Part A, point 9.1.1.2.2)

Soil accumulation and plateau concentration

Not relevant ( Plateau concentration of 0.000 mg/kg reached after 0 years, based on calculation)

### Rate of degradation in soil (anaerobic) laboratory studies active substance (Regulation (EU) N° 283/2013, Annex Part A, point 7.1.2.1.3 and Regulation (EU) N° 284/2013, Annex Part A, point 9.1.1.1)

| Oxasulfuron                          | Dark anaerobic conditions. Results not reported since anaerobic DT50 should not be used for the risk assessment |                  |                                          |                                         |                                          |                       |                       |
|--------------------------------------|-----------------------------------------------------------------------------------------------------------------|------------------|------------------------------------------|-----------------------------------------|------------------------------------------|-----------------------|-----------------------|
| Soil type                            | O.C. (%)                                                                                                        | pH <sup>a)</sup> | t. °C / % MWHC                           | DT <sub>50</sub> / DT <sub>90</sub> (d) | DT <sub>50</sub> (d) 20 °C <sup>b)</sup> | St. (r <sup>2</sup> ) | Method of calculation |
| Gartenacker, Silt loam               | 2.3                                                                                                             | 7.2              | 20°C/40%                                 | -                                       | -                                        | -                     | -                     |
| Gartenacker, Silt loam               | 2.1                                                                                                             | 7.2              | 19.8°C/75% of field capacity             | -                                       | -                                        | -                     | -                     |
| USA, Sandy loam a                    | 0.9                                                                                                             | 7.1              | 25°C/17.7% of field capacity at 0.33 bar | -                                       | -                                        | -                     | -                     |
| USA, Sandy loam b                    | 0.9                                                                                                             | 7.1              | 25°C/17.7% of field capacity at 0.33 bar | -                                       | -                                        | -                     | -                     |
| USA, Sandy loam c                    | 0.8                                                                                                             | 7.4              | 25°C/17.2% of field capacity at 0.33 bar | -                                       | -                                        | -                     | -                     |
| Geometric mean (if not pH dependent) |                                                                                                                 |                  |                                          |                                         |                                          |                       |                       |

<sup>a)</sup> Measured in water

<sup>b)</sup> Normalised using a Q10 of 2.58

### Rate of degradation in soil (anaerobic) laboratory studies transformation products (Regulation (EU) N° 283/2013, Annex Part A, point 7.1.2.1.4 and Regulation (EU) N° 284/2013, Annex Part A, point 9.1.1.1)

| C1801 | Dark anaerobic conditions. Results not reported since anaerobic DT50 should not be used for the risk assessment |
|-------|-----------------------------------------------------------------------------------------------------------------|
|-------|-----------------------------------------------------------------------------------------------------------------|

| Soil type                            | O.C. (%) | pH <sup>a)</sup> | t. °C / % MWHC                | DT <sub>50</sub> /DT <sub>90</sub> (d) | f. f. k <sub>f</sub> / k <sub>dp</sub> | DT <sub>50</sub> (d) 20°C <sup>b)</sup> | St. (χ <sup>2</sup> ) | Method of calculation |
|--------------------------------------|----------|------------------|-------------------------------|----------------------------------------|----------------------------------------|-----------------------------------------|-----------------------|-----------------------|
| Gartenacker, Silt loam               | 2.1      | 7.2              | 19.8°C/75 % of field capacity | -                                      | -                                      | -                                       | -                     | -                     |
| Geometric mean (if not pH dependent) |          |                  |                               |                                        |                                        |                                         |                       |                       |
| Arithmetic mean                      |          |                  |                               |                                        |                                        |                                         |                       |                       |

<sup>a)</sup> Measured in water

<sup>b)</sup> Normalised using a Q10 of 2.58

### Rate of degradation on soil (photolysis) laboratory active substance (Regulation (EU) N° 283/2013, Annex Part A, point 7.1.1.3)

| Parent Soil type         | Soil photolysis |                  |                        |                                                            |       |                                  |
|--------------------------|-----------------|------------------|------------------------|------------------------------------------------------------|-------|----------------------------------|
|                          | O.M. (%)        | pH <sup>a)</sup> | t. °C / % MWHC         | DT <sub>50</sub> / DT <sub>90</sub> (d) calculated at ??°N | C.C.* | Method of calculation            |
| San Joaquin, Clay loam a | 0.8             | 7.3              | 25°C/16.91% at 1/3 bar | 3.7/n.c.                                                   | 0.991 | Regression analysis with EPISTAT |
| San Joaquin, Clay loam b | 0.8             | 7.3              | 25°C/16.91% at 1/3 bar | 3.3/n.c.                                                   | 0.999 | Regression analysis with EPISTAT |
| San Joaquin, Clay loam c | 0.8             | 7.3              | 25°C/16.91% at 1/3 bar | 4.5/n.c.                                                   | 0.978 | Regression analysis with EPISTAT |

<sup>a)</sup> Measured in unknown medium

\* Correlation coefficient

### Soil adsorption active substance (Regulation (EU) N° 283/2013, Annex Part A, point 7.1.3.1.1 and Regulation (EU) N° 284/2013, Annex Part A, point 9.1.2.1)

#### Oxasulfuron

| Soil Type                             | OC % | Soil pH <sup>a)</sup> | K <sub>d</sub> (mL/g) | K <sub>doc</sub> (mL/g) | K <sub>F</sub> (mL/g) | K <sub>Foc</sub> (mL/g) | 1/n  |      |
|---------------------------------------|------|-----------------------|-----------------------|-------------------------|-----------------------|-------------------------|------|------|
| Nassau, Silt loam                     | 1.3  | 6.9                   | n.c.                  | n.c.                    | 0.33                  | 26                      | 1.03 |      |
| Niagara, Clay loam                    | 1.9  | 6.8                   | n.c.                  | n.c.                    | 0.33                  | 17                      | 0.86 |      |
| Sequatchie, Sandy loam                | 0.9  | 7.7                   | n.c.                  | n.c.                    | 0.16                  | 17                      | 1.36 |      |
| Cajon, Loamy sand                     | 0.4  | 6.4                   | n.c.                  | n.c.                    | 0.12                  | 30                      | 0.91 |      |
| Geometric mean (if not pH dependent)* |      |                       |                       |                         |                       |                         |      |      |
| Arithmetic mean (if not pH dependent) |      |                       |                       |                         |                       |                         | 22.5 | 1.04 |
| pH dependence, Yes                    |      |                       |                       |                         |                       |                         |      |      |

<sup>b)</sup> Measured in unknown medium

<sup>c)</sup> \* Only relevant after implementation of the published EFSA guidance.

### Soil adsorption transformation products (Regulation (EU) N° 283/2013, Annex Part A, point 7.1.3.1.2 and Regulation (EU) N° 284/2013, Annex Part A, point 9.1.2.1)

#### saccharin (CGA 27913)

| Soil Type            | OC % | Soil pH <sup>a)</sup> | K <sub>d</sub> (mL/g) | K <sub>doc</sub> (mL/g) | K <sub>F</sub> (mL/g) | K <sub>Foc</sub> (mL/g) | 1/n             |
|----------------------|------|-----------------------|-----------------------|-------------------------|-----------------------|-------------------------|-----------------|
| Maryland, Clay       | 2.8  | 5.9                   | n.c.                  | n.c.                    | 0.09                  | 3                       | 0.94            |
| Maryland, Sand       | 0.5  | 6.5                   | n.c.                  | n.c.                    | 0                     | 0                       | - <sup>b)</sup> |
| Maryland, Sandy loam | 1.1  | 7.5                   | n.c.                  | n.c.                    | 0.03                  | 3                       | 1.05            |

|                                       |      |     |      |      |      |      |      |
|---------------------------------------|------|-----|------|------|------|------|------|
| California, Loam                      | 0.5  | 6.7 | n.c. | n.c. | 0.03 | 6    | 0.53 |
| Gross-Umstadt, Silt loam              | 1.2  | 7.7 | -    | -    | -    | 20   | 0.94 |
| Arrow, Sandy loam                     | 2.3  | 5.7 | -    | -    | -    | 14   | 0.88 |
| Mattapex, Silt loam                   | 2.6  | 6.4 | -    | -    | -    | 12   | 0.94 |
| Speyer 2.1, Sand                      | 0.56 | 6   | -    | -    | -    | 1.8  | 0.92 |
| soil 115, Clay loam                   | 1.7  | 7.4 | -    | -    | -    | 2.2  | 0.71 |
| soil 164, Silt loam                   | 3    | 6.5 | -    | -    | -    | 4.2  | 0.93 |
| soil 243, Sandy loam                  | 1.1  | 4.3 | -    | -    | -    | 4    | 1.01 |
| BBA 2.2, Loamy sand                   | 2.5  | 6.1 | -    | -    | -    | 5.2  | 0.95 |
| Hofchen, Silt loam                    | 2.7  | 7.8 | -    | -    | -    | 4.6  | 0.94 |
| Laacherhof, Silt loam                 | 0.86 | 8.1 | -    | -    | -    | 5.2  | 0.97 |
| Ephrata, Loamy sand                   | 0.37 | 6.8 | -    | -    | -    | 6.7  | 0.95 |
| Stilwell, Silty clay loam             | 1.6  | 6.7 | -    | -    | -    | 15.5 | 0.92 |
| Geometric mean (if not pH dependent)* |      |     |      |      |      |      |      |
| Arithmetic mean (if not pH dependent) |      |     |      |      |      | 6.7  | 0.91 |
| pH dependence, No                     |      |     |      |      |      |      |      |

<sup>a)</sup> Measured in unknown medium

<sup>b)</sup> Taken into account as 1 for the arithmetic mean

\* Only relevant after implementation of the published EFSA guidance.

### C1801

| Soil Type                             | OC % | Soil pH <sup>a)</sup> | K <sub>d</sub> (mL/g) | K <sub>doc</sub> (mL/g) | K <sub>F</sub> (mL/g) | K <sub>Foc</sub> (mL/g) | 1/n  |
|---------------------------------------|------|-----------------------|-----------------------|-------------------------|-----------------------|-------------------------|------|
| 824-3, Sandy loam                     | 1.2  | 7.4                   | n.c.                  | n.c.                    | 0.6                   | 54                      | 0.90 |
| 824-4, Loamy sand                     | 0.3  | 6.2                   | n.c.                  | n.c.                    | 6.2                   | 2124                    | 0.75 |
| 824-1, Silt loam                      | 1.2  | 6.7                   | n.c.                  | n.c.                    | 2.3                   | 213                     | 0.79 |
| 824-2, Clay                           | 1.7  | 6.5                   | n.c.                  | n.c.                    | 2.7                   | 170                     | 0.75 |
| Geometric mean (if not pH dependent)* |      |                       |                       |                         |                       |                         |      |
| Arithmetic mean (if not pH dependent) |      |                       |                       |                         |                       | 640                     | 0.80 |
| pH dependence, No                     |      |                       |                       |                         |                       |                         |      |

<sup>a)</sup> Measured in unknown medium

\* Only relevant after implementation of the published EFSA guidance.

### CGA 179710

| Soil Type                             | OC % | Soil pH <sup>a)</sup> | K <sub>d</sub> (mL/g) | K <sub>doc</sub> (mL/g) | K <sub>F</sub> (mL/g) | K <sub>Foc</sub> (mL/g) | 1/n  |
|---------------------------------------|------|-----------------------|-----------------------|-------------------------|-----------------------|-------------------------|------|
| 824-3, Sandy loam                     | 1.2  | 7.4                   | n.c.                  | n.c.                    | 1.5                   | 143                     | 0.77 |
| 824-4, Loamy sand                     | 0.3  | 6.2                   | n.c.                  | n.c.                    | 1.7                   | 601                     | 0.78 |
| 824-1, Silt loam                      | 1.2  | 6.7                   | n.c.                  | n.c.                    | 2.0                   | 185                     | 0.82 |
| 824-2, Clay                           | 1.7  | 6.5                   | n.c.                  | n.c.                    | 2.3                   | 147                     | 0.76 |
| Geometric mean (if not pH dependent)* |      |                       |                       |                         |                       |                         |      |
| Arithmetic mean (if not pH dependent) |      |                       |                       |                         |                       | 269                     | 0.78 |
| pH dependence, No                     |      |                       |                       |                         |                       |                         |      |

<sup>a)</sup> Measured in unknown medium

\* Only relevant after implementation of the published EFSA guidance.

### M3

Data gap

### CGA 171895 (M5)

Data gap

### CGA 297691

Data gap

### MT6

Data gap

**Mobility in soil column leaching active substance (Regulation (EU) N° 283/2013, Annex Part A, point 7.1.4.1.1 and Regulation (EU) N° 284/2013, Annex Part A, point 9.1.2.1)**

Column leaching

|                                                                                                                                                                                                                             |
|-----------------------------------------------------------------------------------------------------------------------------------------------------------------------------------------------------------------------------|
| <p>Elution (mm): 300 mm<br/>Time period (d): &lt; 1 d (lowest value of 28 tests)</p>                                                                                                                                        |
| <p>Leachate: 94.5 % total residues/radioactivity in leachate (highest value of 28 tests)<br/>91.5 % active substance, 2.6 % C1801<br/>0 % total residues/radioactivity retained in top 30 cm (lowest value of 28 tests)</p> |

**Lysimeter / field leaching studies (Regulation (EU) N° 283/2013, Annex Part A, points 7.1.4.2 / 7.1.4.3 and Regulation (EU) N° 284/2013, Annex Part A, points 9.1.2.2 / 9.1.2.3)**

Lysimeter/ field leaching studies

|                                                                                                                                                                                                                                                                                                                                                                                                                                                                                                                                                                                                                                                                                                                                                                                          |
|------------------------------------------------------------------------------------------------------------------------------------------------------------------------------------------------------------------------------------------------------------------------------------------------------------------------------------------------------------------------------------------------------------------------------------------------------------------------------------------------------------------------------------------------------------------------------------------------------------------------------------------------------------------------------------------------------------------------------------------------------------------------------------------|
| <p>Location: North Carolina<br/>Study type (e.g. lysimeter, field): lysimeter<br/>Soil properties: texture loamy sand to sandy clay loam, pH 5.6-6.6, OC 0.1-0.8% , Field capacity = 10.37-17.81%<br/>Dates of application : June 23, 1993<br/>Number of applications: 1 year, 1 applications per year<br/>Duration 367 days.<br/>Application rate: 117 g/ha/year<br/>Average annual rainfall (mm): 4 mm<br/>Average annual leachate volume (mm): 12.9 liters<br/>% radioactivity in leachate (maximum/year): 1.2% AR<br/>Individual annual maximum: 0.7 µg/L active substance<br/>Analyses for individual constituents in the leachates could not be performed.<br/>Amount of radioactivity in the soils at the end of the study = 8.4% AR; 0.62 % AR as parent, 7.78 % AR as C1801</p> |
| <p>Location: North Carolina<br/>Study type (e.g. lysimeter, field): field<br/>Soil properties: texture , pH=5-6, OC&lt;0.6% , MWHC unknown<br/>Dates of application: June 23, 1993<br/>Crop: soybean /Interception estimated: 0% (incorporation into soil)</p>                                                                                                                                                                                                                                                                                                                                                                                                                                                                                                                           |

Number of applications: 1 year, 1 application per year

Duration: 365 d

Application rate: 224 g/ha/year

Average annual rainfall (mm): 741 mm

% radioactivity in leachate (maximum/year): 0 %  
AR

Individual annual maximum concentrations of all the substances were below the limit of detection (0.1 ppb), except for a single sample that was considered as contaminated. That sample was therefore not considered as valid.

Amount of radioactivity in the soils at the end of the study was below the limit of detection

Location: Wisconsin

Study type (e.g. lysimeter, field): field

Soil properties: texture , pH=5.7-6.8, OC<0.7% ,  
MWHC unknown

Dates of application: June 22, 1994

Crop: soybean /Interception estimated: 0%  
(incorporation into soil)

Number of applications: 1 year, 1 application per year

Duration: 763 d

Application rate: 224 g/ha/year

Average annual rainfall (mm): 1002 mm

Oxasulfuron: no detections in any soil-pore water or groundwater samples through 736 DAA.

CGA 177288: no detections in any soil-pore water samples through 736 DAA. A single detection in ground water (0.17 µg/l)

C 1801: one single pore water detection (0.12 µg/l). No groundwater detections.

saccharin (CGA 27913): sporadic low level detections (up to 0.4 µg/l) in soil-pore water at all depths through 490 DAA, as well as prior to the application (0.1 - 0.3 µg/l). Occasionally present in groundwater samples (up to 3 µg/l). 8 out of 12 samples taken before treatment contained residues of up to 1.5 µg/l.

Amount of radioactivity in the soils at the end of the study was below the limit of detection

### Hydrolytic degradation (Regulation (EU) N° 283/2013, Annex Part A, point 7.2.1.1)

Hydrolytic degradation of the active substance and metabolites > 10 %

pH 5: 6.3-17.2 d at 25-20 °C (pseudo-1<sup>st</sup> order,  $r^2=0.998$ ,  $\chi^2=2.6$ )

CGA 27913: 95.3 % AR (30 d)

C1801: 95.3 % AR (30d)

CGA 297691: 93 % AR (30d)

pH 7: 8.3-22.7 d at 25-20 °C (pseudo-1<sup>st</sup> order,  $r^2=0.999$ ,  $\chi^2=2.7$ )

CGA 27913: 89.4 % AR (30 d)

C1801: 90.8 % AR (30d)

CGA 297691: 88 % AR (30d)

pH 9: 8.2-22.0 d at 25-20 °C (pseudo-1<sup>st</sup> order,  $r^2=0.997$ ,  $\chi^2=2.4$ )

CGA 27913: 87.2 % AR (30 d)

C1801: 88.2 % AR (30d)

CGA 297691: 88.6 % AR (30d)

### Aqueous photochemical degradation (Regulation (EU) N° 283/2013, Annex Part A, points 7.2.1.2 / 7.2.1.3)

Photolytic degradation of active substance and metabolites above 10 %

DT<sub>50</sub>: 3-4 d

C1801: 51 % AR (7 d)

saccharin (CGA 27913): 37 % AR (30 d)

CGA 297691: 91 % AR (30 d)

Estimated DT<sub>50</sub> at 40°N 4.7 days in mid summertime

Estimated DT<sub>50</sub> at 40°N 8.8 days in mid springtime

Estimated DT<sub>50</sub> at 50°N 11.4 days in mid summertime

Estimated DT<sub>50</sub> at 50°N 16.5 days in mid springtime

Quantum yield of direct phototransformation in water at  $\Sigma > 290$  nm

$7.57 \cdot 10^{-3}$  mol · Einstein<sup>-1</sup> at pH 4

$5.33 \cdot 10^{-2}$  mol · Einstein<sup>-1</sup> at pH 9

### 'Ready biodegradability' (Regulation (EU) N° 283/2013, Annex Part A, point 7.2.2.1)

Readily biodegradable (yes/no)

No

### Aerobic mineralisation in surface water (Regulation (EU) N° 283/2013, Annex Part A, point 7.2.2.2 and Regulation (EU) N° 284/2013, Annex Part A, point 9.2.1)

| Oxasulfuron                                             |                |                   |                                                         |                                  |                       |                       |
|---------------------------------------------------------|----------------|-------------------|---------------------------------------------------------|----------------------------------|-----------------------|-----------------------|
| System identifier (indicate fresh, estuarine or marine) | pH water phase | t °C <sup>a</sup> | DT <sub>50</sub> /DT <sub>90</sub> Water (pelagic test) |                                  | St. (χ <sup>2</sup> ) | Method of calculation |
|                                                         |                |                   | At study temp                                           | Normalised to 20 °C <sup>b</sup> |                       |                       |
|                                                         |                |                   |                                                         |                                  |                       |                       |



|                                           |     |    |        |        |     |      |
|-------------------------------------------|-----|----|--------|--------|-----|------|
| Fresh, first label<br>9.4 µg/L appl       | 7.9 | 20 | 24/81  | 24/81  | 7.7 | SFO  |
| Fresh, first label<br>93.1 µg/L appl      | 7.9 | 20 | 22/103 | 22/103 | 5.8 | DFOP |
| Fresh, second<br>label 10.3 µg/L<br>appl  | 7.9 | 20 | 18/139 | 18/139 | 6.9 | FOMC |
| Fresh, second<br>label 105.9 µg/L<br>appl | 7.9 | 20 | 18/114 | 18/114 | 8.8 | FMOC |

<sup>a)</sup> Temperature of incubation

<sup>b)</sup> Normalised using a Q10 of 2.58 to the temperature of the environmental media at the point of sampling. (note temp of x should be stated).

### Mineralisation and non extractable residues (for parent dosed experiments)

| System identifier<br>(indicate fresh,<br>estuarine or<br>marine) | pH water<br>phase | Mineralisation<br>x % after 30 d<br>(end of the<br>study). | Non-extractable<br>residues. max x %<br>after n d<br>(suspended<br>sediment test) | Non-extractable<br>residues. max x %<br>after n d (end of the<br>study) (suspended<br>sediment test) |
|------------------------------------------------------------------|-------------------|------------------------------------------------------------|-----------------------------------------------------------------------------------|------------------------------------------------------------------------------------------------------|
| Fresh, first label<br>9.4 µg/L appl                              | 7.9               | 3.2                                                        | Not reported                                                                      | Not reported                                                                                         |
| Fresh, first label<br>93.1 µg/L appl                             | 7.9               | 0.4                                                        | Not reported                                                                      | Not reported                                                                                         |
| Fresh, second label<br>10.3 µg/L appl                            | 7.9               | 0.8                                                        | Not reported                                                                      | Not reported                                                                                         |
| Fresh, second label<br>105.9 µg/L appl                           | 7.9               | 0.1                                                        | Not reported                                                                      | Not reported                                                                                         |

### Water / sediment study (Regulation (EU) N° 283/2013, Annex Part A, point 7.2.2.3 and Regulation (EU) N° 284/2013, Annex Part A, point 9.2.2)

| Oxasulfuron | Distribution (total radiocarbon max in water 101.0% after 0 d. Max. sed 56.4 % after 57 d) |                                       |                            |                       |                                                        |                          |                                                |                          |                                              |                          |                          |
|-------------|--------------------------------------------------------------------------------------------|---------------------------------------|----------------------------|-----------------------|--------------------------------------------------------|--------------------------|------------------------------------------------|--------------------------|----------------------------------------------|--------------------------|--------------------------|
|             | Water / sediment<br>system                                                                 | pH<br>water<br>phase<br><sup>a)</sup> | pH<br>sed<br><sup>b)</sup> | t °C<br><sup>a)</sup> | DT <sub>50</sub><br>/DT <sub>90</sub><br>whole<br>sys. | St.<br>(χ <sup>2</sup> ) | DT <sub>50</sub><br>/DT <sub>90</sub><br>water | St.<br>(χ <sup>2</sup> ) | DT <sub>50</sub><br>/DT <sub>90</sub><br>sed | St.<br>(χ <sup>2</sup> ) | Method of<br>calculation |
|             | Rhine river-a                                                                              | 8.3                                   | 7                          | 19.4                  | 20.4/83.1                                              | 3                        | n.c.                                           | n.c.                     | n.c.                                         | n.c.                     | FOMC                     |
|             | Rheinfelden pond                                                                           | 8.6                                   | 7.3                        | 19.3                  | 19.5/64.8                                              | 5.6                      | n.c.                                           | n.c.                     | n.c.                                         | n.c.                     | SFO                      |
|             | Rhine river-b                                                                              | 8.6                                   | 7.45                       | 19.6                  | 21.5/71.3                                              | 5.7                      | n.c.                                           | n.c.                     | n.c.                                         | n.c.                     | SFO                      |
|             | Geometric mean at 20°C <sup>c)</sup>                                                       |                                       |                            |                       | 21.9 <sup>d)</sup>                                     |                          |                                                |                          |                                              |                          |                          |

<sup>a)</sup> During equilibration and incubation

<sup>b)</sup> Measured in KCl

<sup>c)</sup> Normalised using a Q10 of 2.58

<sup>d)</sup> For Rhine river-b a value of 25 d (DT90/3.32) has been considered for geomean calculation, since FOMC calculation has been used

| <b>Metabolite C1801</b>              |                | <b>Distribution unknown. Max in total system 66.7 % after 120 days, kinetic formation fraction (<math>k_f/k_{dp}</math>): 0.85 in pond experiment, 0.88 in river experiment from oxasulfuron. Whole system calculation.</b> |       |                                               |                  |                                          |                  |                                        |                  |                        |
|--------------------------------------|----------------|-----------------------------------------------------------------------------------------------------------------------------------------------------------------------------------------------------------------------------|-------|-----------------------------------------------|------------------|------------------------------------------|------------------|----------------------------------------|------------------|------------------------|
| Water / sediment system              | pH water phase | pH sed <sup>a)</sup>                                                                                                                                                                                                        | t. °C | DT <sub>50</sub> /DT <sub>90</sub> whole sys. | St. ( $\chi^2$ ) | DT <sub>50</sub> /DT <sub>90</sub> water | St. ( $\chi^2$ ) | DT <sub>50</sub> /DT <sub>90</sub> sed | St. ( $\chi^2$ ) | Method of calculation  |
| Rheinfelden pond                     | 8.6            | 7.3                                                                                                                                                                                                                         | 19.3  | 108/359                                       | 7.1              | n.c.                                     | n.c.             | n.c.                                   | n.c.             | SFO+SFO                |
| Rhine river-b                        | 8.6            | 7.45                                                                                                                                                                                                                        | 19.6  | 232/772                                       | 3.7              | n.c.                                     | n.c.             | n.c.                                   | n.c.             | DFOP+SFO <sup>c)</sup> |
| Geometric mean at 20°C <sup>b)</sup> |                |                                                                                                                                                                                                                             |       | 158.3                                         |                  |                                          |                  |                                        |                  |                        |

<sup>a)</sup> Measured in [medium to be stated, usually calcium chloride solution or water]

<sup>b)</sup> Normalised using a Q10 of 2.58

<sup>c)</sup> Excluding latest time-step

### Mineralisation and non extractable residues (from parent dosed experiments)

| Water / sediment system | pH water phase <sup>a)</sup> | pH sed <sup>b)</sup> | Mineralisation x % after n d. (end of the study). | Non-extractable residues in sed. max x % after n d | Non-extractable residues in sed. max x % after n d (end of the study) |
|-------------------------|------------------------------|----------------------|---------------------------------------------------|----------------------------------------------------|-----------------------------------------------------------------------|
| Rhine river-a           | 8.3                          | 7                    | 72.8% after 182 d                                 | 24.6% after 56 d                                   | 20.9% after 182 d                                                     |
| Rheinfelden pond        | 8.6                          | 7.3                  | 33.25% after 180 d                                | 24.6% after 180 d                                  | 24.6% after 180 d                                                     |
| Rhine river-b           | 8.6                          | 7.45                 | 53.86% after 180 d                                | 19.65% after 180 d                                 | 19.65% after 180 d                                                    |

<sup>a)</sup> During equilibration and incubation

<sup>b)</sup> Measured in KCl

### Fate and behaviour in air (Regulation (EU) N° 283/2013, Annex Part A, point 7.3.1)

|                                            |                                                                                                                                                                                                                                                                                                                                                                                                                                                                                       |
|--------------------------------------------|---------------------------------------------------------------------------------------------------------------------------------------------------------------------------------------------------------------------------------------------------------------------------------------------------------------------------------------------------------------------------------------------------------------------------------------------------------------------------------------|
| Direct photolysis in air                   | Not studied - no data requested                                                                                                                                                                                                                                                                                                                                                                                                                                                       |
| Photochemical oxidative degradation in air | DT <sub>50</sub> of 3-15 hours derived by the Atkinson model (version unknown). OH (12 h) concentration assumed = $1.5 \cdot 10^6$ OH-radicals . cm <sup>-3</sup>                                                                                                                                                                                                                                                                                                                     |
| Volatilisation                             | from plant surfaces (BBA guideline): considered as not relevant, in agreement with the Henry's law constant of $<3.2 \cdot 10^{-5}$ Pa . m <sup>3</sup> . mole <sup>-1</sup> (20°C, calculated from vapour pressure and water solubility)<br>from soil surfaces (BBA guideline): considered as not relevant, in agreement with the Henry's law constant of $<3.2 \cdot 10^{-5}$ Pa . m <sup>3</sup> . mole <sup>-1</sup> (20°C, calculated from vapour pressure and water solubility) |
| Metabolites                                | No metabolites expected                                                                                                                                                                                                                                                                                                                                                                                                                                                               |

### Residues requiring further assessment (Regulation (EU) N° 283/2013, Annex Part A, point 7.4.1)

Environmental occurring residues requiring further assessment by other disciplines (toxicology and ecotoxicology) and or requiring consideration for groundwater exposure

Soil: Oxasulfuron, saccharin (CGA 27913), C1801, M3, M5 (CGA 171895), CGA 179710, CGA 297691, MT6  
 Surface water: Oxasulfuron, saccharin (CGA 27913), C1801, M3, M5 (CGA 171895), CGA 179710, CGA 297691, guanidine, 3-guanidine-1-butene, MT6  
 Sediment: Oxasulfuron, saccharin (CGA 27913), C1801, M3, M5 (CGA 171895), CGA 179710, CGA 297691, MT6  
 Ground water: Oxasulfuron, saccharin (CGA 27913), C1801, M3, M5 (CGA 171895), CGA 179710, CGA 297691, MT6  
 Air: Oxasulfuron

### Definition of the residue for monitoring (Regulation (EU) N° 283/2013, Annex Part A, point 7.4.2)

Soil: Oxasulfuron (CGA-277476)  
 Water: Oxasulfuron (CGA-277476)  
 Groundwater: Oxasulfuron (CGA-277476), M3

### Monitoring data, if available (Regulation (EU) N° 283/2013, Annex Part A, point 7.5)

Soil (indicate location and type of study)

None available from formal monitoring requests at EU or national level

Surface water (indicate location and type of study)

None available from formal monitoring requests at EU or national level

Ground water (indicate location and type of study)

None available from formal monitoring requests at EU or national level

Air (indicate location and type of study)

None available from formal monitoring requests at EU or national level

### PEC soil (Regulation (EU) N° 284/2013, Annex Part A, points 9.1.3 / 9.3.1)

Oxasulfuron  
 Method of calculation

DT<sub>50</sub> (d): 29.3 days  
 Kinetics: SFO  
 Field or Lab: representative worst case from lab studies.

Application data

Crop: soybean  
 Depth of soil layer: 5cm  
 Soil bulk density: 1.5g/cm<sup>3</sup>  
 % plant interception: 35%  
 Number of applications: 1  
 Interval (d): -  
 Application rate(s): 75 g a.s./ha

| <b>PEC<sub>(s)</sub><br/>(mg/kg)</b> | <b>Single<br/>application<br/>Actual</b> | <b>Single<br/>application<br/>Time weighted<br/>average</b> | <b>Multiple<br/>application<br/>Actual</b> | <b>Multiple<br/>application<br/>Time weighted<br/>average</b> |
|--------------------------------------|------------------------------------------|-------------------------------------------------------------|--------------------------------------------|---------------------------------------------------------------|
| Initial                              | 0.065                                    | -                                                           | -                                          | -                                                             |
| Short term 24h                       | 0.063                                    | 0.064                                                       | -                                          | -                                                             |
| 2d                                   | 0.062                                    | 0.063                                                       | -                                          | -                                                             |
| 4d                                   | 0.059                                    | 0.062                                                       | -                                          | -                                                             |
| Long term 7d                         | 0.055                                    | 0.060                                                       | -                                          | -                                                             |
| 28d                                  | 0.034                                    | 0.048                                                       | -                                          | -                                                             |
| 50d                                  | 0.020                                    | 0.038                                                       | -                                          | -                                                             |
| 100d                                 | 0.006                                    | 0.025                                                       | -                                          | -                                                             |
| Plateau<br>concentration             | 0.000 mg/kg                              |                                                             |                                            |                                                               |

saccharin (CGA 27913)  
 Method of calculation

Molecular weight relative to the parent:  
 183.0/406.4 g/mol  
 DT<sub>50</sub> (d): 237.4 days  
 Kinetics: SFO  
 Field or Lab: representative worst case from lab  
 studies.

Application data

Application rate assumed: 33.27 g/ha (assumed  
 CGA 27913 is formed at a maximum of 98.5 % of  
 the applied dose)

| <b>PEC<sub>(s)</sub><br/>(mg/kg)</b> | <b>Single<br/>application<br/>Actual</b> | <b>Single<br/>application<br/>Time weighted<br/>average</b> | <b>Multiple<br/>application<br/>Actual</b> | <b>Multiple<br/>application<br/>Time weighted<br/>average</b> |
|--------------------------------------|------------------------------------------|-------------------------------------------------------------|--------------------------------------------|---------------------------------------------------------------|
| Initial                              | 0.029                                    | -                                                           | -                                          | -                                                             |
| Short term 24h                       | 0.029                                    | 0.029                                                       | -                                          | -                                                             |
| 2d                                   | 0.029                                    | 0.029                                                       | -                                          | -                                                             |
| 4d                                   | 0.028                                    | 0.029                                                       | -                                          | -                                                             |
| Long term 7d                         | 0.028                                    | 0.029                                                       | -                                          | -                                                             |
| 28d                                  | 0.027                                    | 0.028                                                       | -                                          | -                                                             |
| 50d                                  | 0.025                                    | 0.027                                                       | -                                          | -                                                             |
| 100d                                 | 0.022                                    | 0.025                                                       | -                                          | -                                                             |
| Plateau<br>concentration             | 0.004 mg/kg                              |                                                             |                                            |                                                               |

C1801  
Method of calculation

Molecular weight relative to the parent:  
123.0/406.4 g/mol  
DT<sub>50</sub> (d): 468 days  
Kinetics: SFO+SFO  
Field or Lab: lab

Application data

Application rate assumed: 12.48 g/ha (assumed C1801 is formed at a maximum of 55 % of the applied dose)

| PEC <sub>(s)</sub><br>(mg/kg) | Single application<br>Actual | Single application<br>Time weighted<br>average | Multiple application<br>Actual | Multiple application<br>Time weighted<br>average |
|-------------------------------|------------------------------|------------------------------------------------|--------------------------------|--------------------------------------------------|
| Initial                       | 0.011                        | -                                              | -                              | -                                                |
| Short term 24h                | 0.011                        | 0.011                                          | -                              | -                                                |
| 2d                            | 0.011                        | 0.011                                          | -                              | -                                                |
| 4d                            | 0.011                        | 0.011                                          | -                              | -                                                |
| Long term 7d                  | 0.011                        | 0.011                                          | -                              | -                                                |
| 28d                           | 0.010                        | 0.011                                          | -                              | -                                                |
| 50d                           | 0.010                        | 0.010                                          | -                              | -                                                |
| 100d                          | 0.010                        | 0.010                                          | -                              | -                                                |
| Plateau concentration         | 0.004 mg/kg after 4 yr       |                                                |                                |                                                  |

M3  
Method of calculation

Molecular weight relative to the parent: 436/406.4 g/mol  
DT<sub>50</sub> (d): 1000 days  
Kinetics: -  
Field or Lab: worst case assumption

Application data

Application rate assumed: 20.12 g/ha (assumed M3 is formed at a maximum of 25 % of the applied dose)

| PEC <sub>(s)</sub><br>(mg/kg) | Single application<br>Actual | Single application<br>Time weighted<br>average | Multiple application<br>Actual | Multiple application<br>Time weighted<br>average |
|-------------------------------|------------------------------|------------------------------------------------|--------------------------------|--------------------------------------------------|
| Initial                       | 0.017                        | -                                              | -                              | -                                                |
| Short term 24h                | 0.017                        | 0.017                                          | -                              | -                                                |
| 2d                            | 0.017                        | 0.017                                          | -                              | -                                                |
| 4d                            | 0.017                        | 0.017                                          | -                              | -                                                |
| Long term 7d                  | 0.017                        | 0.017                                          | -                              | -                                                |
| 28d                           | 0.017                        | 0.017                                          | -                              | -                                                |
| 50d                           | 0.017                        | 0.017                                          | -                              | -                                                |
| 100d                          | 0.016                        | 0.017                                          | -                              | -                                                |
| Plateau                       | 0.015 mg/kg after 6 yr       |                                                |                                |                                                  |

concentration

CGA 171895 (M5)  
Method of calculation

Molecular weight relative to the parent: 124/406.4 g/mol  
DT<sub>50</sub> (d): 1000 days  
Kinetics: -  
Field or Lab: worst case assumption

Application data

Application rate assumed: 2.33 g/ha (assumed M5 is formed at a maximum of 10.2 % of the applied dose)

| PEC <sub>(s)</sub><br>(mg/kg) | Single application<br>Actual | Single application<br>Time weighted<br>average | Multiple application<br>Actual | Multiple application<br>Time weighted<br>average |
|-------------------------------|------------------------------|------------------------------------------------|--------------------------------|--------------------------------------------------|
| Initial                       | 0.002                        | -                                              | -                              | -                                                |
| Short term 24h                | 0.002                        | 0.002                                          | -                              | -                                                |
| 2d                            | 0.002                        | 0.002                                          | -                              | -                                                |
| 4d                            | 0.002                        | 0.002                                          | -                              | -                                                |
| Long term 7d                  | 0.002                        | 0.002                                          | -                              | -                                                |
| 28d                           | 0.002                        | 0.002                                          | -                              | -                                                |
| 50d                           | 0.002                        | 0.002                                          | -                              | -                                                |
| 100d                          | 0.002                        | 0.002                                          | -                              | -                                                |
| Plateau concentration         | 0.002 mg/kg                  |                                                |                                |                                                  |

CGA 179710  
Method of calculation

Molecular weight relative to the parent: 166/406.4 g/mol  
DT<sub>50</sub> (d): 1000 days  
Kinetics: -  
Field or Lab: worst case assumption

Application data

Application rate assumed: 8.42 g/ha (assumed CGA 179710 is formed at a maximum of 27.5 % of the applied dose)

| PEC <sub>(s)</sub><br>(mg/kg) | Single application<br>Actual | Single application<br>Time weighted<br>average | Multiple application<br>Actual | Multiple application<br>Time weighted<br>average |
|-------------------------------|------------------------------|------------------------------------------------|--------------------------------|--------------------------------------------------|
| Initial                       | 0.007                        | -                                              | -                              | -                                                |
| Short term 24h                | 0.007                        | 0.007                                          | -                              | -                                                |
| 2d                            | 0.007                        | 0.007                                          | -                              | -                                                |
| 4d                            | 0.007                        | 0.007                                          | -                              | -                                                |
| Long term 7d                  | 0.007                        | 0.007                                          | -                              | -                                                |
| 28d                           | 0.007                        | 0.007                                          | -                              | -                                                |
| 50d                           | 0.007                        | 0.007                                          | -                              | -                                                |
| 100d                          | 0.007                        | 0.007                                          | -                              | -                                                |
| Plateau concentration         | 0.006 mg/kg                  |                                                |                                |                                                  |

CGA 297691  
Method of calculation

Molecular weight relative to the parent: 74.1/406.4 g/mol  
DT<sub>50</sub> (d): 1000 days  
Kinetics: -  
Field or Lab: worst case assumption

Application data

Application rate assumed: 2.87 g/ha (assumed CGA 297691 is formed at a maximum of 21 % of the applied dose)

| PEC <sub>(s)</sub><br>(mg/kg) | Single application<br>Actual | Single application<br>Time weighted<br>average | Multiple application<br>Actual | Multiple application<br>Time weighted<br>average |
|-------------------------------|------------------------------|------------------------------------------------|--------------------------------|--------------------------------------------------|
| Initial                       | 0.002                        | -                                              | -                              | -                                                |
| Short term 24h                | 0.002                        | 0.002                                          | -                              | -                                                |
| 2d                            | 0.002                        | 0.002                                          | -                              | -                                                |
| 4d                            | 0.002                        | 0.002                                          | -                              | -                                                |
| Long term 7d                  | 0.002                        | 0.002                                          | -                              | -                                                |
| 28d                           | 0.002                        | 0.002                                          | -                              | -                                                |
| 50d                           | 0.002                        | 0.002                                          | -                              | -                                                |
| 100d                          | 0.002                        | 0.002                                          | -                              | -                                                |
| Plateau concentration         | 0.002 mg/kg                  |                                                |                                |                                                  |

MT6

Data gap

### PEC ground water (Regulation (EU) N° 284/2013, Annex Part A, point 9.2.4.1)

Method of calculation and type of study (*e.g.* modelling, field leaching, lysimeter)

For FOCUS gw modelling,  
Modelling using FOCUS model(s), with appropriate FOCUSgw scenarios, according to FOCUS guidance.  
Model(s) used: FOCUS PEARL v. 4.4.4, FOCUS PELMO v. 5.5.3  
Crop: soybeans  
Crop uptake factor: 0  
  
Oxasulfuron  
Water solubility (mg/L): 1700 at pH 7 and 25°C  
Vapour pressure: 0 Pa at 25°C  
DT<sub>50 lab</sub>: 9.4 d (geometric mean, normalisation to pF2, 20 °C with Q10 of 2.58 and Walker equation coefficient 0.7).  
K<sub>OC</sub>: 17 mL/g (worst case),  $1/n = 1.36$  (arithmetic mean).  
  
Metabolites:  
saccharin (CGA 27913)  
DT<sub>50 lab</sub>: 24.7d (geometric mean, normalisation to pF2, 20 °C with Q10 of 2.58 and Walker equation

coefficient 0.7).

$K_{OC}$ : 6.7mL/g (arithmetic mean),  $1/n = 0.91$  (arithmetic mean).

Formation fraction: 0.86 from oxasulfuron

C1801

$DT_{50}$ : 26.6 d (geometric mean).

$K_{OC}$ : 640 mL/g (arithmetic mean),  $1/n = 0.8$  (arithmetic mean).

Formation fraction: 1<sup>a)</sup> from oxasulfuron

CGA 179710

$DT_{50}$ : 1000 d (worst-case default value).

$K_{OC}$ : 269 mL/g (arithmetic mean),  $1/n = 0.78$  (arithmetic mean).

Formation fraction: 1 from oxasulfuron

CGA 297691

$DT_{50}$ : 1000 d (worst-case default value).

$K_{OC}$ : 0 mL/g (worst case default value),  $1/n = 1$ .

Formation fraction: 1 from oxasulfuron

CGA 171895 (M5)

Data gap

M3

Data gap

MT6

Data gap

For field and lysimeter studies

Location: North Carolina

Study type (e.g. lysimeter, field): lysimeter

Soil properties: pH 5.6-6.6, OC 0.1-0.8% , Field capacity = 10.37-17.81%

Dates of application : June 23, 1993

Number of applications: 1 year, 1 application per year

Duration: 367 days.

Average annual rainfall (mm): 4 mm

Average annual leachate volume (mm): 12.9 liters

Location: North Carolina

Study type (e.g. lysimeter, field): field

Soil properties: pH=5-6, OC<0.6% , MWHC unknown

Dates of application: June 23, 1993

Crop: soybean /Interception estimated: 0% (incorporation into soil)

Number of applications: 1 year, 1 application per



Application rate

|                                                                                                                                                                                                                                                                                                                                                                                                                                    |
|------------------------------------------------------------------------------------------------------------------------------------------------------------------------------------------------------------------------------------------------------------------------------------------------------------------------------------------------------------------------------------------------------------------------------------|
| year<br>Duration: 365 d<br>Average annual rainfall (mm): 741 mm<br><br>Location: Wisconsin<br>Study type (e.g. lysimeter, field): field<br>Soil properties: pH=5.7-6.8, OC<0.7% , MWHC unknown<br>Dates of application: June 22, 1994<br>Crop: soybean /Interception estimated: 0% (incorporation into soil)<br>Number of applications: 1 year, 1 application per year<br>Duration: 763 d<br>Average annual rainfall (mm): 1002 mm |
| Gross application rate: 75 g/ha.<br>Crop growth stage: BBCH 10-14<br>Canopy interception %: 35 <sup>b)</sup><br>Application rate net of interception: 48.75 g/ha.<br>No. of applications: 1<br>Time of application (absolute or relative application dates): 1, 10 and 20 days after emergence (relative applications)                                                                                                             |

<sup>a)</sup> a value of 0.57 should be used for future calculations

<sup>b)</sup> canopy interception was specified in calculations performed by the applicant, while was calculated by the model in PECgw calculations for M3 (one application every third year) and CGA 297691 performed by the RMS

### PEC(gw) - FOCUS modelling results (80<sup>th</sup> percentile annual average concentration at 1m)

| PELMO 5.5.3<br>/Soybeans | Scenario<br>(annual appl)         | Oxasulfuro<br>n<br>(µg/L) | Metabolites (µg/L) |       |
|--------------------------|-----------------------------------|---------------------------|--------------------|-------|
|                          |                                   |                           | CGA 27913          | C1801 |
|                          | Piacenza, 1 day after emergence   | 0.007                     | 0.449              | 0.000 |
|                          | Piacenza, 10 days after emergence | 0.005                     | 0.472              | 0.000 |
|                          | Piacenza, 20 days after emergence | 0.006                     | 0.471              | 0.000 |

| PELMO 5.5.3<br>/Sovbeans                                                        | Scenario<br>(appl every third year) | Oxasulfuro<br>n<br>(µg/L) | Metabolites (µg/L) |       |
|---------------------------------------------------------------------------------|-------------------------------------|---------------------------|--------------------|-------|
|                                                                                 |                                     |                           | CGA 27913          | C1801 |
|                                                                                 | Piacenza, 1 day after emergence     | n.c.                      | 0.182              | n.c.  |
|                                                                                 | Piacenza, 10 days after emergence   | n.c.                      | 0.177              | n.c.  |
|                                                                                 | Piacenza, 20 days after emergence   | n.c.                      | 0.184              | n.c.  |
| PEARL 4.4.4<br>/Sovbeans                                                        | Scenario<br>(annual appl)           | Oxasulfuro<br>n<br>(µg/L) | Metabolites (µg/L) |       |
|                                                                                 |                                     |                           | CGA 27913          | C1801 |
|                                                                                 | Piacenza, 1 day after emergence     | 0.005                     | 0.291              | 0.002 |
|                                                                                 | Piacenza, 10 days after emergence   | 0.004                     | 0.362              | 0.002 |
|                                                                                 | Piacenza, 20 days after emergence   | 0.005                     | 0.208              | 0.004 |
| PEARL 4.4.4<br>/Sovbeans                                                        | Scenario<br>(appl every third year) | Oxasulfuro<br>n<br>(µg/L) | Metabolites (µg/L) |       |
|                                                                                 |                                     |                           | CGA 27913          | C1801 |
|                                                                                 | Piacenza, 1 day after emergence     | n.c.                      | 0.075              | n.c.  |
|                                                                                 | Piacenza, 10 days after emergence   | n.c.                      | 0.099              | n.c.  |
|                                                                                 | Piacenza, 20 days after emergence   | n.c.                      | 0.132              | n.c.  |
| n.c. not calculated since an acceptable risk was found with annual applications |                                     |                           |                    |       |
| PELMO 5.5.3<br>/Sovbeans                                                        | Scenario<br>(annual appl)           | Metabolites (µg/L)        |                    |       |
|                                                                                 |                                     | CGA 179710                | CGA 297691         |       |
|                                                                                 | Piacenza, 1 day after emergence     | 0.042                     | 2.436              |       |
|                                                                                 | Piacenza, 10 days after emergence   | 0.038                     | 2.437              |       |
|                                                                                 | Piacenza, 20 days after emergence   | 0.050                     | 2.448              |       |
| PELMO 5.5.3<br>/Sovbeans                                                        | Scenario<br>(appl every third year) | Metabolites (µg/L)        |                    |       |
|                                                                                 |                                     | CGA 179710                | CGA 297691         |       |
|                                                                                 | Piacenza, 1 day after emergence     | n.c.                      | 1.270              |       |
|                                                                                 | Piacenza, 10 days after emergence   | n.c.                      | 1.251              |       |
|                                                                                 | Piacenza, 20 days after emergence   | n.c.                      | 1.251              |       |

| PEARL 4.4.4<br>/Soybeans | Scenario<br>(annual appl)           | Metabolites (µg/L) |            |
|--------------------------|-------------------------------------|--------------------|------------|
|                          |                                     | CGA 179710         | CGA 297691 |
| PEARL 4.4.4<br>/Soybeans | Piacenza, 1 day after emergence     | 0.039              | 2.982      |
|                          | Piacenza, 10 days after emergence   | 0.039              | 2.989      |
|                          | Piacenza, 20 days after emergence   | 0.048              | 3.004      |
| PEARL 4.4.4<br>/Soybeans | Scenario<br>(appl every third year) | Metabolites (µg/L) |            |
|                          |                                     | CGA 179710         | CGA 297691 |
| PEARL 4.4.4<br>/Soybeans | Piacenza, 1 day after emergence     | n.c.               | 1.029      |
|                          | Piacenza, 10 days after emergence   | n.c.               | 1.033      |
|                          | Piacenza, 20 days after emergence   | n.c.               | 1.039      |

n.c. not calculated since an acceptable risk was found with annual applications

### PEC<sub>(gw)</sub> From lysimeter / field studies

| Oxasulfuron           | 1 <sup>st</sup> year | 2 <sup>nd</sup> year | 3 <sup>rd</sup> year |
|-----------------------|----------------------|----------------------|----------------------|
| Annual average (µg/L) | Not detected         | Not detected         | Not detected         |

| CGA 27913             | 1 <sup>st</sup> year | 2 <sup>nd</sup> year | 3 <sup>rd</sup> year |
|-----------------------|----------------------|----------------------|----------------------|
| Annual average (µg/L) | < 0.1                | n.p.                 | n.p.                 |

n.p.: not performed, since study duration was too short

### PEC surface water and PEC sediment (Regulation (EU) N° 284/2013, Annex Part A, points 9.2.5 / 9.3.1)

Oxasulfuron

Parameters used in FOCUSsw step 1 and 2

Version control no. of FOCUS calculator: STEPS 1-2 in FOCUS v. 3.2

Molecular weight (g/mol): 406.4

K<sub>OC</sub>/K<sub>OM</sub> (mL/g): 17/9.86 (worst case to take into account the pH effects)

DT<sub>50</sub> soil (d): 9.4 (geometric mean from lab)

DT<sub>50</sub> water/sediment system (d): 21.9 (geometric mean from sediment water studies)

DT<sub>50</sub> water (d): 21.9 (whole system)

DT<sub>50</sub> sediment (d): 1000 (worst-case)

Crop interception (%): 35 % (minimal crop cover)

Parameters used in FOCUSsw step 3 and 4

Version control no.'s of FOCUS software: SPIN v. 2.2, SWASH v. 5.3, Drift calculator v. 1.1, MACRO v. 5.5.4, PRZM v. 4.3.1, TOXSWA v. 4.4.3

Water solubility (mg/L): 1700

Application rate

Vapour pressure:  $2 \times 10^{-6}$  Pa at 25°C  
 $K_{OC}/K_{OM}$  (mL/g): 17/9.86 (worst case to take into account the pH effects)  
 $1/n$ : 1.36 (worst case to take into account the pH effects)  
 $Q_{10}=2.58$ , Walker equation coefficient 0.7  
 Crop uptake factor: 0

Crop and growth stage: soybeans BBCH 10-14  
 Number of applications: 1  
 Interval (d): -  
 Application rate(s): 75 g a.s./ha  
 Application window:  
 Step 1-2: Mar-May (worst-case).  
 Step 3:

| Scenario | Timing        |               |
|----------|---------------|---------------|
|          | Early         | Late          |
| R3       | 11 May-10 Jun | 21 May-20 Jun |
| R4       | 11 Mar-11 Apr | 21 Mar-20 Apr |

| FOCUS STEP 1<br>Scenario | Day after overall maximum | PEC <sub>SW</sub> (µg/L) |         | PEC <sub>SED</sub> (µg/kg) |        |
|--------------------------|---------------------------|--------------------------|---------|----------------------------|--------|
|                          |                           | Actual                   | TWA     | Actual                     | TWA    |
|                          | 0 h                       | 25.1356                  | --      | 4.1558                     | ---    |
|                          | 24 h                      | 24.3377                  | 24.7367 | 4.1374                     | 4.1466 |
|                          | 2 d                       | 23.5795                  | 24.3467 | 4.0085                     | 4.1096 |
|                          | 4 d                       | 22.1331                  | 23.5977 | 3.7626                     | 3.9969 |
|                          | 7 d                       | 20.1283                  | 22.5336 | 3.4218                     | 3.8223 |
|                          | 14 d                      | 16.1282                  | 20.2940 | 2.7418                     | 3.4458 |
|                          | 21 d                      | 12.9231                  | 18.3515 | 2.1969                     | 3.1170 |
|                          | 28 d                      | 10.3549                  | 16.6616 | 1.7603                     | 2.8304 |
|                          | 42 d                      | 6.6483                   | 13.8961 | 1.1302                     | 2.3609 |

## Treatments during March to May

| FOCUS STEP 2<br>Scenario | Day after overall maximum | PEC <sub>SW</sub> (µg/L) |        | PEC <sub>SED</sub> (µg/kg) |        |
|--------------------------|---------------------------|--------------------------|--------|----------------------------|--------|
|                          |                           | Actual                   | TWA    | Actual                     | TWA    |
| Southern EU              | 0 h                       | 6.4240                   | ---    | 1.0906                     | ---    |
|                          | 24 h                      | 6.2199                   | 6.3219 | 1.0574                     | 1.0740 |
|                          | 2 d                       | 6.0303                   | 6.2235 | 1.0251                     | 1.0576 |
|                          | 4 d                       | 5.6683                   | 6.0357 | 0.9636                     | 1.0259 |
|                          | 7 d                       | 5.1656                   | 5.7690 | 0.8782                     | 0.9806 |
|                          | 14 d                      | 4.1593                   | 5.2068 | 0.7071                     | 0.8851 |
|                          | 21 d                      | 3.3490                   | 4.7178 | 0.5693                     | 0.8020 |
|                          | 28 d                      | 2.6966                   | 4.2912 | 0.4584                     | 0.7295 |

|  |      |        |        |        |        |
|--|------|--------|--------|--------|--------|
|  | 42 d | 1.7483 | 3.5903 | 0.2972 | 0.6103 |
|--|------|--------|--------|--------|--------|

**Early application**

| FOCUS STEP<br>3<br>Scenario | Water<br>body | Day after<br>overall<br>maximum | PEC <sub>SW</sub> (µg/L) |       | PEC <sub>SED</sub> (µg/kg) |       |
|-----------------------------|---------------|---------------------------------|--------------------------|-------|----------------------------|-------|
|                             |               |                                 | Actual                   | TWA   | Actual                     | TWA   |
| R3                          | stream        | 0 h                             | 2.621                    | --    | 0.1506                     | --    |
|                             |               | 24 h                            | 0.0027                   | 1.511 | 0.064                      | 0.117 |
|                             |               | 2 d                             | 0.0005                   | 0.758 | 0.046                      | 0.090 |
|                             |               | 4 d                             | 0.347                    | 0.379 | 0.049                      | 0.066 |
|                             |               | 7 d                             | 0.000                    | 0.239 | 0.028                      | 0.054 |
|                             |               | 14 d                            | 0.000                    | 0.128 | 0.017                      | 0.038 |
|                             |               | 21 d                            | 0.000                    | 0.085 | 0.011                      | 0.030 |
|                             |               | 28 d                            | 0.000                    | 0.064 | 0.008                      | 0.025 |
|                             |               | 42 d                            | 0.000                    | 0.043 | 0.005                      | 0.019 |
| R4                          | stream        | 0 h                             | 0.272                    | --    | 0.008                      | --    |
|                             |               | 24 h                            | 0.000                    | 0.049 | 0.002                      | 0.004 |
|                             |               | 2 d                             | 0.000                    | 0.024 | 0.001                      | 0.003 |
|                             |               | 4 d                             | 0.000                    | 0.012 | 0.001                      | 0.002 |
|                             |               | 7 d                             | 0.000                    | 0.007 | 0.001                      | 0.002 |
|                             |               | 14 d                            | < 1e-6                   | 0.003 | 0.000                      | 0.001 |
|                             |               | 21 d                            | < 1e-6                   | 0.002 | 0.000                      | 0.001 |
|                             |               | 28 d                            | < 1e-6                   | 0.002 | 0.000                      | 0.001 |
|                             |               | 42 d                            | < 1e-6                   | 0.001 | 0.000                      | 0.000 |

**Late application**

| FOCUS STEP<br>3<br>-Scenario | Water<br>body | Day after<br>overall<br>maximum | PEC <sub>SW</sub> (µg/L) |        | PEC <sub>SED</sub> (µg/kg) |        |
|------------------------------|---------------|---------------------------------|--------------------------|--------|----------------------------|--------|
|                              |               |                                 | Actual                   | TWA    | Actual                     | TWA    |
| R3                           | stream        | 0 h                             | 0.5222                   | --     | 0.0387                     | --     |
|                              |               | 24 h                            | 0.0024                   | 0.4397 | 0.0209                     | 0.0332 |
|                              |               | 2 d                             | 0.0002                   | 0.2338 | 0.0151                     | 0.0271 |
|                              |               | 4 d                             | 0.0001                   | 0.1170 | 0.0108                     | 0.0205 |
|                              |               | 7 d                             | 0.0000                   | 0.0669 | 0.0081                     | 0.0160 |
|                              |               | 14 d                            | 0.0000                   | 0.0372 | 0.0060                     | 0.0120 |
|                              |               | 21 d                            | 0.0022                   | 0.0292 | 0.0042                     | 0.0097 |
|                              |               | 28 d                            | 0.0000                   | 0.0237 | 0.0030                     | 0.0082 |
|                              |               | 42 d                            | 0.0000                   | 0.0159 | 0.0019                     | 0.0065 |
| R4                           | stream        | 0 h                             | 0.2715                   | --     | 0.0078                     | --     |
|                              |               | 24 h                            | 0.0000                   | 0.0489 | 0.0021                     | 0.0040 |
|                              |               | 2 d                             | 0.0000                   | 0.0245 | 0.0015                     | 0.0029 |
|                              |               | 4 d                             | 0.0000                   | 0.0122 | 0.0010                     | 0.0021 |
|                              |               | 7 d                             | < 1e-6                   | 0.0070 | 0.0007                     | 0.0016 |
|                              |               | 14 d                            | < 1e-6                   | 0.0035 | 0.0005                     | 0.0011 |
|                              |               | 21 d                            | < 1e-6                   | 0.0023 | 0.0003                     | 0.0008 |
|                              |               | 28 d                            | < 1e-6                   | 0.0017 | 0.0002                     | 0.0007 |
|                              |               | 42 d                            | < 1e-6                   | 0.0012 | 0.0001                     | 0.0005 |

### Early application

| FOCUS STEP 4<br>Scenario (20m<br>vegetated<br>filter strips) | Water<br>body | Day after<br>overall<br>maximum | PEC <sub>SW</sub> (µg/L) |          | PEC <sub>SED</sub> (µg/kg) |        |
|--------------------------------------------------------------|---------------|---------------------------------|--------------------------|----------|----------------------------|--------|
|                                                              |               |                                 | Actual                   | TWA      | Actual                     | TWA    |
| R3                                                           | stream        | 0 h                             | 0.6203                   | --       | 0.0346                     | --     |
|                                                              |               | 24 h                            | 0.0006                   | 0.356    | 0.0146                     | 0.0267 |
|                                                              |               | 2 d                             | 0.0001                   | 0.1788   | 0.0105                     | 0.0021 |
|                                                              |               | 4 d                             | 0.0770                   | 0.08942  | 0.0110                     | 0.0151 |
|                                                              |               | 7 d                             | 0.0000                   | 0.05589  | 0.0063                     | 0.0122 |
|                                                              |               | 14 d                            | 0.0000                   | 0.02892  | 0.0038                     | 0.0086 |
|                                                              |               | 21d                             | 0.0000                   | 0.01928  | 0.0026                     | 0.0068 |
|                                                              |               | 28 d                            | 0.0000                   | 0.01446  | 0.0019                     | 0.0057 |
|                                                              |               | 42 d                            | 0.0000                   | 0.009667 | 0.0012                     | 0.0043 |
| R4                                                           | stream        | 0 h                             | 0.0316                   | --       | 0.0009                     | --     |
|                                                              |               | 24 h                            | 0.0000                   | 0.0057   | 0.0002                     | 0.0005 |
|                                                              |               | 2 d                             | < 1e-6                   | 0.0028   | 0.0002                     | 0.0003 |
|                                                              |               | 4 d                             | < 1e-6                   | 0.0014   | 0.0001                     | 0.0002 |
|                                                              |               | 7 d                             | < 1e-6                   | 0.0008   | 0.0001                     | 0.0002 |
|                                                              |               | 14 d                            | < 1e-6                   | 0.0004   | 0.0000                     | 0.0001 |
|                                                              |               | 21 d                            | < 1e-6                   | 0.0003   | 0.0000                     | 0.0001 |
|                                                              |               | 28 d                            | < 1e-6                   | 0.0002   | 0.0000                     | 0.0001 |
|                                                              |               | 42 d                            | < 1e-6                   | 0.0001   | 0.0000                     | 0.0001 |

### Late application

| FOCUS STEP 4<br>Scenario<br>(20m<br>vegetated<br>filter strips) | Water<br>body | Day after<br>overall<br>maximum | PEC <sub>SW</sub> (µg/L) |        | PEC <sub>SED</sub> (µg/kg) |        |
|-----------------------------------------------------------------|---------------|---------------------------------|--------------------------|--------|----------------------------|--------|
|                                                                 |               |                                 | Actual                   | TWA    | Actual                     | TWA    |
| R3                                                              | stream        | 0 h                             | 0.1249                   | --     | 0.0088                     | --     |
|                                                                 |               | 24 h                            | 0.0278                   | 0.1061 | 0.0048                     | 0.0076 |
|                                                                 |               | 2 d                             | 0.0001                   | 0.0564 | 0.0034                     | 0.0062 |
|                                                                 |               | 4 d                             | 0.0000                   | 0.0282 | 0.0024                     | 0.0047 |
|                                                                 |               | 7 d                             | 0.0000                   | 0.0161 | 0.0018                     | 0.0036 |
|                                                                 |               | 14 d                            | 0.0000                   | 0.0090 | 0.0013                     | 0.0027 |
|                                                                 |               | 21d                             | 0.0000                   | 0.0062 | 0.0009                     | 0.0022 |
|                                                                 |               | 28 d                            | 0.0000                   | 0.0051 | 0.0006                     | 0.0018 |
|                                                                 |               | 42 d                            | < 1e-6                   | 0.0034 | 0.0004                     | 0.0014 |
| R4                                                              | stream        | 0 h                             | 0.0316                   | --     | 0.0009                     | --     |
|                                                                 |               | 24 h                            | 0.0000                   | 0.0057 | 0.0002                     | 0.0005 |
|                                                                 |               | 2 d                             | < 1e-6                   | 0.0028 | 0.0002                     | 0.0003 |
|                                                                 |               | 4 d                             | < 1e-6                   | 0.0014 | 0.0001                     | 0.0002 |
|                                                                 |               | 7 d                             | < 1e-6                   | 0.0008 | 0.0001                     | 0.0002 |

|      |        |        |        |        |
|------|--------|--------|--------|--------|
| 14 d | < 1e-6 | 0.0004 | 0.0000 | 0.0001 |
| 21 d | < 1e-6 | 0.0003 | 0.0000 | 0.0001 |
| 28 d | < 1e-6 | 0.0002 | 0.0000 | 0.0001 |
| 42 d | < 1e-6 | 0.0001 | 0.0000 | 0.0001 |

Metabolite saccharin (CGA 27913)  
Parameters used in FOCUSsw step 1 and 2

Molecular weight: 183.0  
Soil or water metabolite: soil and water  
Koc/Kom (mL/g): 6.7/3.9  
Water solubility (mg/L): 1700  
DT<sub>50</sub> soil (d): 24.7 (geometric mean from lab)  
DT<sub>50</sub> water/sediment system (d): 1000 (worst case)  
DT<sub>50</sub> water (d): 1000 (worst case)  
DT<sub>50</sub> sediment (d): 1000 (worst case)  
Crop interception (%): 35% (minimal crop cover)  
Maximum occurrence observed (% molar basis with respect to the parent)  
Total Water and Sediment: 54%  
Soil: 98.5%

Application rate

Crop and growth stage: soybeans BBCH 10-14  
Number of applications: 1  
Interval (d): -  
Application rate(s): 75 g a.s./ha  
Application window: Mar-May and Jun-Sep.

| FOCUS STEP<br>1<br>Scenario | Day after<br>overall<br>maximum | PEC <sub>SW</sub> (µg/L) |         | PEC <sub>SED</sub> (µg/kg) |        |
|-----------------------------|---------------------------------|--------------------------|---------|----------------------------|--------|
|                             |                                 | Actual                   | TWA     | Actual                     | TWA    |
|                             | 0 h                             | 17.2176                  |         | 1.1423                     |        |
|                             | 24 h                            | 17.2042                  | 17.2109 | 1.1527                     | 1.1475 |
|                             | 2 d                             | 17.1923                  | 17.2046 | 1.1519                     | 1.1499 |
|                             | 4 d                             | 17.1685                  | 17.1925 | 1.1503                     | 1.1505 |
|                             | 7 d                             | 17.1328                  | 17.1745 | 1.1479                     | 1.1499 |
|                             | 14 d                            | 17.0499                  | 17.1329 | 1.1423                     | 1.1475 |
|                             | 21 d                            | 16.9673                  | 17.0915 | 1.1368                     | 1.1449 |
|                             | 28 d                            | 16.8852                  | 17.0502 | 1.1313                     | 1.1422 |
|                             | 42 d                            | 16.7222                  | 16.9680 | 1.1204                     | 1.1367 |

#### Treatments during March to May

| FOCUS STEP<br>2<br>Scenario | Day after<br>overall<br>maximum | PEC <sub>SW</sub> (µg/L) |        | PEC <sub>SED</sub> (µg/kg) |        |
|-----------------------------|---------------------------------|--------------------------|--------|----------------------------|--------|
|                             |                                 | Actual                   | TWA    | Actual                     | TWA    |
| Southern EU                 | 0 h                             | 4.7542                   | ---    | 0.3183                     | ---    |
|                             | 24 h                            | 4.7504                   | 4.7523 | 0.3181                     | 0.3182 |
|                             | 2 d                             | 4.7471                   | 4.7505 | 0.3178                     | 0.3181 |
|                             | 4 d                             | 4.7406                   | 4.7472 | 0.3174                     | 0.3178 |

|      |        |        |        |        |
|------|--------|--------|--------|--------|
| 7 d  | 4.7307 | 4.7422 | 0.3167 | 0.3175 |
| 14 d | 4.7078 | 4.7307 | 0.3152 | 0.3167 |
| 21 d | 4.6850 | 4.7193 | 0.3137 | 0.3160 |
| 28 d | 4.6623 | 4.7079 | 0.3122 | 0.3152 |
| 42 d | 4.6173 | 4.6852 | 0.3091 | 0.3137 |

## Metabolite C1801

Parameters used in FOCUSsw step 1 and 2

Molecular weight: 123.0  
 Soil or water metabolite: soil and water  
 Koc/Kom (mL/g): 640/371.2  
 Water solubility (mg/L): 1700  
 DT<sub>50</sub> soil (d): 26.6 days (geometric mean from lab studies)  
 DT<sub>50</sub> water/sediment system (d): 158.3 (geometric mean from sediment water studies)<sup>a)</sup>  
 DT<sub>50</sub> water (d): 158.3 (whole system)  
 DT<sub>50</sub> sediment (d): 1000 (worst case)  
 Crop interception (%): 35 (minimal crop cover)  
 Maximum occurrence observed (% molar basis with respect to the parent):  
 Total Water and Sediment: 67%  
 Soil: 55%

Parameters used in FOCUSsw step 3

Vapour pressure: 0 Pa at 20°C  
 Koc/Kom (mL/g): 640/371.2  
 1/n: 0.8  
 Q10=2.58, Walker equation coefficient 0.7  
 Crop uptake factor: 0  
 Metabolite kinetically generated in simulation (yes/no): yes  
 Formation fraction in soil ( $k_f/k_{dp}$ ): 1  
 Formation fraction in sediment water ( $k_f/k_{dp}$ ): 1

Application rate

Crop and growth stage: soybeans BBCH 10-14  
 Number of applications: 1  
 Interval (d): -  
 Application rate(s): 75 g a.s./ha  
 Application window:  
 Step 1-2: Mar-May.  
 Step 3:

| Scenario | Timing        |               |
|----------|---------------|---------------|
|          | Early         | Late          |
| R3       | 11 May-10 Jun | 21 May-20 Jun |
| R4       | 11 Mar-11 Apr | 21 Mar-20 Apr |

Main routes of entry

Runoff

<sup>a)</sup> Simulation with DT<sub>50</sub>water=1000d and DT<sub>50</sub>sed=158.3d is not reported since it gave higher PEC<sub>sed</sub>, but no risk assessment for the sediment compartment is needed for



metabolite C1801

| FOCUS STEP<br>1<br>Scenario | Day after<br>overall<br>maximum | PEC <sub>SW</sub> (µg/L) |        | PEC <sub>SED</sub> (µg/kg) |         |
|-----------------------------|---------------------------------|--------------------------|--------|----------------------------|---------|
|                             |                                 | Actual                   | TWA    | Actual                     | TWA     |
|                             | 0 h                             | 5.0955                   |        | 31.7202                    |         |
|                             | 24 h                            | 5.0094                   | 5.0525 | 32.0604                    | 31.8903 |
|                             | 2 d                             | 4.9875                   | 5.0255 | 31.9203                    | 31.9403 |
|                             | 4 d                             | 4.9441                   | 4.9956 | 31.6420                    | 31.8606 |
|                             | 7 d                             | 4.8795                   | 4.9597 | 31.2291                    | 31.6783 |
|                             | 14 d                            | 4.7322                   | 4.8826 | 30.2864                    | 31.2168 |
|                             | 21 d                            | 4.5894                   | 4.8085 | 29.3722                    | 30.7535 |
|                             | 28 d                            | 4.4509                   | 4.7364 | 28.4855                    | 30.2968 |
|                             | 42 d                            | 4.1862                   | 4.5966 | 26.7918                    | 29.4079 |

## Treatments during March to May

| FOCUS STEP<br>2<br>Scenario | Day after<br>overall<br>maximum | PEC <sub>SW</sub> (µg/L) |        | PEC <sub>SED</sub> (µg/kg) |        |
|-----------------------------|---------------------------------|--------------------------|--------|----------------------------|--------|
|                             |                                 | Actual                   | TWA    | Actual                     | TWA    |
| Northern EU                 | 0 h                             | 1.3802                   | ---    | 8.7421                     | ---    |
|                             | 24 h                            | 1.3609                   | 1.3706 | 8.7187                     | 8.7304 |
|                             | 2 d                             | 1.3573                   | 1.3648 | 8.6953                     | 8.7187 |
|                             | 4 d                             | 1.3500                   | 1.3592 | 8.6489                     | 8.6954 |
|                             | 7 d                             | 1.3392                   | 1.3530 | 8.5796                     | 8.6606 |
|                             | 14 d                            | 1.3143                   | 1.3399 | 8.4201                     | 8.5801 |
|                             | 21 d                            | 1.2899                   | 1.3273 | 8.2636                     | 8.5006 |
|                             | 28 d                            | 1.2659                   | 1.3149 | 8.1101                     | 8.4221 |
|                             | 42 d                            | 1.2193                   | 1.2908 | 7.8114                     | 8.2680 |

## Early application

| FOCUS STEP<br>3<br>Scenario | Water<br>body | Day after<br>overall<br>maximum | PEC <sub>SW</sub> (µg/L) |        | PEC <sub>SED</sub> (µg/kg) |        |
|-----------------------------|---------------|---------------------------------|--------------------------|--------|----------------------------|--------|
|                             |               |                                 | Actual                   | TWA    | Actual                     | TWA    |
| R3                          | stream        | 0 h                             | 0.1351                   | --     | 0.0609                     | --     |
|                             |               | 24 h                            | 0.0003                   | 0.0781 | 0.0559                     | 0.0593 |
|                             |               | 2 d                             | 0.0002                   | 0.0393 | 0.0513                     | 0.0571 |
|                             |               | 4 d                             | 0.0261                   | 0.0197 | 0.0527                     | 0.0534 |
|                             |               | 7 d                             | 0.0001                   | 0.0130 | 0.0434                     | 0.0514 |
|                             |               | 14 d                            | 0.0000                   | 0.0066 | 0.0323                     | 0.0446 |
|                             |               | 21 d                            | 0.0000                   | 0.0044 | 0.0270                     | 0.0397 |
|                             |               | 28 d                            | 0.0000                   | 0.0035 | 0.0345                     | 0.0378 |
|                             |               | 42 d                            | 0.0000                   | 0.0025 | 0.0347                     | 0.0371 |
| R4                          | stream        | 0 h                             | 0.0030                   | --     | 0.0086                     | --     |
|                             |               | 24 h                            | < 1e-6                   | 0.0025 | 0.0084                     | 0.0085 |

|  |      |        |        |        |        |
|--|------|--------|--------|--------|--------|
|  | 2 d  | < 1e-6 | 0.0021 | 0.0082 | 0.0084 |
|  | 4 d  | 0.0026 | 0.0011 | 0.0078 | 0.0083 |
|  | 7 d  | 0.0000 | 0.0008 | 0.0074 | 0.0081 |
|  | 14 d | 0.0000 | 0.0005 | 0.0067 | 0.0079 |
|  | 21 d | 0.0000 | 0.0004 | 0.0062 | 0.0076 |
|  | 28 d | 0.0000 | 0.0003 | 0.0059 | 0.0073 |
|  | 42 d | < 1e-6 | 0.0002 | 0.0054 | 0.0068 |

### Late application

| FOCUS STEP<br>3<br>Scenario | Water<br>body | Day after<br>overall<br>maximum | PEC <sub>Sw</sub> (µg/L) |        | PEC <sub>SED</sub> (µg/kg) |        |
|-----------------------------|---------------|---------------------------------|--------------------------|--------|----------------------------|--------|
|                             |               |                                 | Actual                   | TWA    | Actual                     | TWA    |
| R3                          | stream        | 0 h                             | 0.0563                   | --     | 0.1006                     | --     |
|                             |               | 24 h                            | 0.0004                   | 0.0475 | 0.0991                     | 0.1002 |
|                             |               | 2 d                             | 0.0001                   | 0.0253 | 0.0976                     | 0.0996 |
|                             |               | 4 d                             | 0.0001                   | 0.0127 | 0.0950                     | 0.0983 |
|                             |               | 7 d                             | 0.0001                   | 0.0073 | 0.0920                     | 0.0965 |
|                             |               | 14 d                            | 0.0001                   | 0.0055 | 0.0902                     | 0.0943 |
|                             |               | 21 d                            | 0.0127                   | 0.0037 | 0.0913                     | 0.0935 |
|                             |               | 28 d                            | 0.0000                   | 0.0032 | 0.0902                     | 0.0930 |
|                             |               | 42 d                            | 0.0000                   | 0.0024 | 0.0853                     | 0.0924 |
| R4                          | stream        | 0 h                             | 0.0071                   | --     | 0.0179                     | --     |
|                             |               | 24 h                            | 0.0000                   | 0.0057 | 0.0173                     | 0.0177 |
|                             |               | 2 d                             | 0.0000                   | 0.0049 | 0.0167                     | 0.0174 |
|                             |               | 4 d                             | 0.0058                   | 0.0025 | 0.0158                     | 0.0171 |
|                             |               | 7 d                             | 0.0000                   | 0.0020 | 0.0170                     | 0.0169 |
|                             |               | 14 d                            | 0.0000                   | 0.0013 | 0.0146                     | 0.0164 |
|                             |               | 21 d                            | 0.0000                   | 0.0008 | 0.0132                     | 0.0156 |
|                             |               | 28 d                            | 0.0000                   | 0.0006 | 0.0123                     | 0.0149 |
|                             |               | 42 d                            | 0.0000                   | 0.0004 | 0.0112                     | 0.0138 |

#### Metabolite M3

Parameters used in FOCUS<sub>sw</sub> step 1 and 2

Molecular weight: 436  
 Soil or water metabolite: soil  
 Koc/Kom (mL/g): 0/0  
 Water solubility (mg/L): 1700  
 DT<sub>50</sub> soil (d): 1000 (worst case)  
 DT<sub>50</sub> water/sediment system (d): 1000 (worst case)  
 DT<sub>50</sub> water (d): 1000 (worst case)  
 DT<sub>50</sub> sediment (d): 1000 (worst case)  
 Crop interception (%): 35 (minimal crop cover)  
 Maximum occurrence observed (% molar basis with respect to the parent):  
 Total Water and Sediment: 0.001% (default as M3 was not listed in water/sediment studies but FOCUS Steps 1-2 will not accept 0 as input)

Parameters used in FOCUSsw step 3 and 4

| Soil: 25%                                                                                                                                                                                                                                                                                                            |               |               |  |       |      |    |               |               |    |               |               |
|----------------------------------------------------------------------------------------------------------------------------------------------------------------------------------------------------------------------------------------------------------------------------------------------------------------------|---------------|---------------|--|-------|------|----|---------------|---------------|----|---------------|---------------|
| Vapour pressure: 0 Pa at 20°C<br>Kom/Koc (mL/g): 0/0<br>1/n: 1<br>Q10=2.58, Walker equation coefficient 0.7<br>Crop uptake factor: 0<br>Metabolite kinetically generated in simulation (yes/no): yes<br>Formation fraction in soil ( $k_f/k_{dp}$ ): 1<br>Formation fraction in sediment water ( $k_f/k_{dp}$ ): 0   |               |               |  |       |      |    |               |               |    |               |               |
| Application rate                                                                                                                                                                                                                                                                                                     |               |               |  |       |      |    |               |               |    |               |               |
| Crop and growth stage: soybeans BBCH 10-14<br>Number of applications: 1<br>Interval (d): -<br>Application rate(s): 75 g a.s./ha<br>Application window:<br>Step 1-2: Mar-May and Jun-Sep.<br>Step 3-4:                                                                                                                |               |               |  |       |      |    |               |               |    |               |               |
| <table border="1"> <thead> <tr> <th rowspan="2">Scenario</th> <th colspan="2">Timing</th> </tr> <tr> <th>Early</th> <th>Late</th> </tr> </thead> <tbody> <tr> <td>R3</td> <td>11 May-10 Jun</td> <td>21 May-20 Jun</td> </tr> <tr> <td>R4</td> <td>11 Mar-11 Apr</td> <td>21 Mar-20 Apr</td> </tr> </tbody> </table> | Scenario      | Timing        |  | Early | Late | R3 | 11 May-10 Jun | 21 May-20 Jun | R4 | 11 Mar-11 Apr | 21 Mar-20 Apr |
| Scenario                                                                                                                                                                                                                                                                                                             |               | Timing        |  |       |      |    |               |               |    |               |               |
|                                                                                                                                                                                                                                                                                                                      | Early         | Late          |  |       |      |    |               |               |    |               |               |
| R3                                                                                                                                                                                                                                                                                                                   | 11 May-10 Jun | 21 May-20 Jun |  |       |      |    |               |               |    |               |               |
| R4                                                                                                                                                                                                                                                                                                                   | 11 Mar-11 Apr | 21 Mar-20 Apr |  |       |      |    |               |               |    |               |               |
| Main routes of entry                                                                                                                                                                                                                                                                                                 |               |               |  |       |      |    |               |               |    |               |               |
| Runoff                                                                                                                                                                                                                                                                                                               |               |               |  |       |      |    |               |               |    |               |               |

| FOCUS STEP 1 Scenario | Day after overall maximum | PEC <sub>SW</sub> (µg/L) |        | PEC <sub>SED</sub> (µg/kg) |        |
|-----------------------|---------------------------|--------------------------|--------|----------------------------|--------|
|                       |                           | Actual                   | TWA    | Actual                     | TWA    |
|                       | 0 h                       | 6.7055                   | --     | 0.0000                     | --     |
|                       | 24 h                      | 6.7008                   | 6.7032 | 0.0000                     | 0.0000 |
|                       | 2 d                       | 6.6962                   | 6.7008 | 0.0000                     | 0.0000 |
|                       | 4 d                       | 6.6869                   | 6.6962 | 0.0000                     | 0.0000 |
|                       | 7 d                       | 6.6730                   | 6.6893 | 0.0000                     | 0.0000 |
|                       | 14 d                      | 6.6407                   | 6.6731 | 0.0000                     | 0.0000 |
|                       | 21 d                      | 6.6086                   | 6.6569 | 0.0000                     | 0.0000 |
|                       | 28 d                      | 6.5766                   | 6.6408 | 0.0000                     | 0.0000 |
|                       | 42 d                      | 6.5131                   | 6.6088 | 0.0000                     | 0.0000 |

## Treatments during March to May

| FOCUS STEP 2 Scenario | Day after overall maximum | PEC <sub>SW</sub> (µg/L) |        | PEC <sub>SED</sub> (µg/kg) |        |
|-----------------------|---------------------------|--------------------------|--------|----------------------------|--------|
|                       |                           | Actual                   | TWA    | Actual                     | TWA    |
| Southern EU           | 0 h                       | 2.1398                   | --     | 0.0000                     | --     |
|                       | 24 h                      | 2.1383                   | 2.1391 | 0.0000                     | 0.0000 |
|                       | 2 d                       | 2.1368                   | 2.1383 | 0.0000                     | 0.0000 |
|                       | 4 d                       | 2.1339                   | 2.1368 | 0.0000                     | 0.0000 |

|      |        |        |        |        |
|------|--------|--------|--------|--------|
| 7 d  | 2.1294 | 2.1346 | 0.0000 | 0.0000 |
| 14 d | 2.1191 | 2.1295 | 0.0000 | 0.0000 |
| 21 d | 2.1089 | 2.1243 | 0.0000 | 0.0000 |
| 28 d | 2.0987 | 2.1192 | 0.0000 | 0.0000 |
| 42 d | 2.0784 | 2.1090 | 0.0000 | 0.0000 |

**Early application**

| FOCUS STEP<br>3<br>Scenario | Water<br>body | Day after<br>overall<br>maximum | PEC <sub>SW</sub> (µg/L) |          | PEC <sub>SED</sub> (µg/kg) |        |
|-----------------------------|---------------|---------------------------------|--------------------------|----------|----------------------------|--------|
|                             |               |                                 | Actual                   | TWA      | Actual                     | TWA    |
| R3                          | stream        | 0 h                             | 0.5241                   | --       | 0.02806                    | --     |
|                             |               | 24 h                            | 0.0005                   | 0.3024   | 0.0119                     | 0.0218 |
|                             |               | 2 d                             | 0.0001                   | 0.1518   | 0.0086                     | 0.0167 |
|                             |               | 4 d                             | 0.1199                   | 0.0759   | 0.0116                     | 0.0123 |
|                             |               | 7 d                             | 0.0000                   | 0.0511   | 0.0057                     | 0.0104 |
|                             |               | 14 d                            | 0.0000                   | 0.0255   | 0.0034                     | 0.0075 |
|                             |               | 21d                             | 0.0000                   | 0.0170   | 0.0023                     | 0.0059 |
|                             |               | 28 d                            | 0.0000                   | 0.0129   | 0.0017                     | 0.0050 |
|                             |               | 42 d                            | 0.0000                   | 0.0086   | 0.0010                     | 0.0038 |
| R4                          | stream        | 0 h                             | 0.000198                 | --       | 0.0000                     | --     |
|                             |               | 24 h                            | < 1e-6                   | 0.000116 | 0.0000                     | 0.0000 |
|                             |               | 2 d                             | < 1e-6                   | 0.0001   | 0.0000                     | 0.0000 |
|                             |               | 4 d                             | < 1e-6                   | 0.0000   | 0.0000                     | 0.0000 |
|                             |               | 7 d                             | < 1e-6                   | 0.0000   | 0.0000                     | 0.0000 |
|                             |               | 14 d                            | < 1e-6                   | 0.0000   | 0.0000                     | 0.0000 |
|                             |               | 21 d                            | < 1e-6                   | 0.0000   | < 1e-6                     | 0.0000 |
|                             |               | 28 d                            | < 1e-6                   | 0.0000   | < 1e-6                     | 0.0000 |
|                             |               | 42 d                            | < 1e-6                   | 0.0000   | < 1e-6                     | 0.0000 |

**Late application**

| FOCUS STEP<br>3<br>Scenario | Water<br>body | Day after<br>overall<br>maximum | PEC <sub>SW</sub> (µg/L) |        | PEC <sub>SED</sub> (µg/kg) |        |
|-----------------------------|---------------|---------------------------------|--------------------------|--------|----------------------------|--------|
|                             |               |                                 | Actual                   | TWA    | Actual                     | TWA    |
| R3                          | stream        | 0 h                             | 0.5408                   | --     | 0.0368                     | --     |
|                             |               | 24 h                            | 0.002508                 | 0.4558 | 0.0196                     | 0.0315 |
|                             |               | 2 d                             | 0.000185                 | 0.2425 | 0.0138                     | 0.0256 |
|                             |               | 4 d                             | 0.000062                 | 0.1213 | 0.0098                     | 0.0207 |
|                             |               | 7 d                             | 0.000026                 | 0.0694 | 0.0072                     | 0.0148 |
|                             |               | 14 d                            | 0.000016                 | 0.0400 | 0.0057                     | 0.0112 |
|                             |               | 21d                             | 0.002374                 | 0.0267 | 0.0039                     | 0.0091 |
|                             |               | 28 d                            | 0.000004                 | 0.0201 | 0.0027                     | 0.0076 |
|                             |               | 42 d                            | 0.000002                 | 0.0134 | 0.0016                     | 0.0058 |
| R4                          | stream        | 0 h                             | 0.0081                   | --     | 0.0005                     | --     |
|                             |               | 24 h                            | 0.0000                   | 0.0047 | 0.0002                     | 0.0003 |

|  |      |        |        |        |        |
|--|------|--------|--------|--------|--------|
|  | 2 d  | < 1e-6 | 0.0024 | 0.0001 | 0.0003 |
|  | 4 d  | 0.0000 | 0.0013 | 0.0001 | 0.0002 |
|  | 7 d  | < 1e-6 | 0.0007 | 0.0001 | 0.0001 |
|  | 14 d | < 1e-6 | 0.0004 | 0.0000 | 0.0001 |
|  | 21 d | < 1e-6 | 0.0002 | 0.0000 | 0.0001 |
|  | 28 d | < 1e-6 | 0.0002 | 0.0000 | 0.0001 |
|  | 42 d | < 1e-6 | 0.0001 | 0.0000 | 0.0000 |

### Early application

| FOCUS STEP 4<br>Scenario<br>(20m vegetated filter strips) | Water body | Day after overall maximum | PEC <sub>SW</sub> (µg/L) |         | PEC <sub>SED</sub> (µg/kg) |          |
|-----------------------------------------------------------|------------|---------------------------|--------------------------|---------|----------------------------|----------|
|                                                           |            |                           | Actual                   | TWA     | Actual                     | TWA      |
| R3                                                        | stream     | 0 h                       | 0.1241                   | --      | 0.0066                     | --       |
|                                                           |            | 24 h                      | 0.000128                 | 0.0713  | 0.0028                     | 0.0051   |
|                                                           |            | 2 d                       | 0.000021                 | 0.0358  | 0.0020                     | 0.0039   |
|                                                           |            | 4 d                       | 0.02665                  | 0.0179  | 0.0026                     | 0.0029   |
|                                                           |            | 7 d                       | 0.000005                 | 0.0119  | 0.0013                     | 0.0024   |
|                                                           |            | 14 d                      | 0.000002                 | 0.0059  | 0.0008                     | 0.0017   |
|                                                           |            | 21 d                      | < 1e-6                   | 0.0040  | 0.0005                     | 0.0014   |
|                                                           |            | 28 d                      | < 1e-6                   | 0.0030  | 0.0004                     | 0.0012   |
|                                                           |            | 42 d                      | < 1e-6                   | 0.0020  | 0.0002                     | 0.0009   |
| R4                                                        | stream     | 0 h                       | 0.00005                  | --      | 0.000003                   | --       |
|                                                           |            | 24 h                      | < 1e-6                   | 0.00003 | 0.000001                   | 0.000002 |
|                                                           |            | 2 d                       | < 1e-6                   | 0.00001 | < 1e-6                     | 0.000001 |
|                                                           |            | 4 d                       | < 1e-6                   | 0.00001 | < 1e-6                     | 0.000001 |
|                                                           |            | 7 d                       | < 1e-6                   | 0.00000 | < 1e-6                     | < 1e-6   |
|                                                           |            | 14 d                      | < 1e-6                   | 0.00000 | < 1e-6                     | < 1e-6   |
|                                                           |            | 21 d                      | < 1e-6                   | 0.00000 | < 1e-6                     | < 1e-6   |
|                                                           |            | 28 d                      | < 1e-6                   | 0.00000 | < 1e-6                     | < 1e-6   |
|                                                           |            | 42 d                      | < 1e-6                   | < 1e-6  | < 1e-6                     | < 1e-6   |

### Late application

| FOCUS STEP 4<br>Scenario<br>(20m vegetated filter strips) | Water body | Day after overall maximum | PEC <sub>SW</sub> (µg/L) |        | PEC <sub>SED</sub> (µg/kg) |        |
|-----------------------------------------------------------|------------|---------------------------|--------------------------|--------|----------------------------|--------|
|                                                           |            |                           | Actual                   | TWA    | Actual                     | TWA    |
| R3                                                        | stream     | 0 h                       | 0.1294                   | --     | 0.0088                     | --     |
|                                                           |            | 24 h                      | 0.0291                   | 0.1100 | 0.0047                     | 0.0076 |
|                                                           |            | 2 d                       | 0.0001                   | 0.0586 | 0.0033                     | 0.0062 |
|                                                           |            | 4 d                       | 0.0000                   | 0.0293 | 0.0024                     | 0.0046 |
|                                                           |            | 7 d                       | 0.0000                   | 0.0167 | 0.0017                     | 0.0036 |

|    |        |      |          |        |          |         |
|----|--------|------|----------|--------|----------|---------|
|    |        | 14 d | 0.0000   | 0.0096 | 0.0014   | 0.0027  |
|    |        | 21d  | 0.0006   | 0.0064 | 0.0009   | 0.0022  |
|    |        | 28 d | 0.0000   | 0.0048 | 0.0006   | 0.0018  |
|    |        | 42 d | < 1e-6   | 0.0032 | 0.0004   | 0.0014  |
| R4 | stream | 0 h  | 0.001893 | --     | 0.000113 | --      |
|    |        | 24 h | < 1e-6   | 0.0011 | 0.000043 | 0.00008 |
|    |        | 2 d  | < 1e-6   | 0.0005 | 0.000031 | 0.00006 |
|    |        | 4 d  | 0.000004 | 0.0003 | 0.000025 | 0.00005 |
|    |        | 7 d  | < 1e-6   | 0.0002 | 0.000018 | 0.00004 |
|    |        | 14 d | < 1e-6   | 0.0001 | 0.000011 | 0.00002 |
|    |        | 21 d | < 1e-6   | 0.0001 | 0.000007 | 0.00002 |
|    |        | 28 d | < 1e-6   | 0.0000 | 0.000005 | 0.00002 |
|    |        | 42 d | < 1e-6   | 0.0000 | 0.000003 | 0.00001 |

Metabolite CGA 297691

Parameters used in FOCUSsw step 1 and 2

Molecular weight: 74.08  
 Soil or water metabolite: water  
 Koc/Kom (mL/g): 0/0  
 Water solubility (mg/L): 1700  
 DT<sub>50</sub> soil (d): 1000 (worst case)  
 DT<sub>50</sub> water/sediment system (d): 1000 (worst case)  
 DT<sub>50</sub> water (d): 1000 (worst case)  
 DT<sub>50</sub> sediment (d): 1000 (worst case)  
 Crop interception (%): 35 (minimal crop cover)  
 Maximum occurrence observed (% molar basis with respect to the parent):  
 Total Water and Sediment: 93%  
 Soil: 21%

Application rate

Crop and growth stage: soybeans BBCH 10-14  
 Number of applications: 1  
 Interval (d): -  
 Application rate(s): 75 g a.s./ha  
 Application window: Mar-May and Jun-Sep.

| FOCUS STEP 1 Scenario | Day after overall maximum | PEC <sub>SW</sub> (µg/L) |        | PEC <sub>SED</sub> (µg/kg) |        |
|-----------------------|---------------------------|--------------------------|--------|----------------------------|--------|
|                       |                           | Actual                   | TWA    | Actual                     | TWA    |
|                       | 0 h                       | 5.3134                   |        | 0.0000                     |        |
|                       | 24 h                      | 5.3098                   | 5.3116 | 0.0000                     | 0.0000 |
|                       | 2 d                       | 5.3061                   | 5.3098 | 0.0000                     | 0.0000 |
|                       | 4 d                       | 5.2987                   | 5.3061 | 0.0000                     | 0.0000 |
|                       | 7 d                       | 5.2877                   | 5.3006 | 0.0000                     | 0.0000 |
|                       | 14 d                      | 5.2621                   | 5.2877 | 0.0000                     | 0.0000 |
|                       | 21 d                      | 5.2367                   | 5.2750 | 0.0000                     | 0.0000 |
|                       | 28 d                      | 5.2113                   | 5.2622 | 0.0000                     | 0.0000 |
|                       | 42 d                      | 5.1610                   | 5.2368 | 0.0000                     | 0.0000 |

## Treatments during March to May

| FOCUS STEP<br>2<br>Scenario | Day after<br>overall<br>maximum | PEC <sub>SW</sub> (µg/L) |        | PEC <sub>SED</sub> (µg/kg) |        |
|-----------------------------|---------------------------------|--------------------------|--------|----------------------------|--------|
|                             |                                 | Actual                   | TWA    | Actual                     | TWA    |
| Southern EU                 | 0 h                             | 1.4321                   | ---    | 0.0000                     | ---    |
|                             | 24 h                            | 1.4312                   | 1.4317 | 0.0000                     | 0.0000 |
|                             | 2 d                             | 1.4302                   | 1.4312 | 0.0000                     | 0.0000 |
|                             | 4 d                             | 1.4282                   | 1.4302 | 0.0000                     | 0.0000 |
|                             | 7 d                             | 1.4252                   | 1.4287 | 0.0000                     | 0.0000 |
|                             | 14 d                            | 1.4183                   | 1.4252 | 0.0000                     | 0.0000 |
|                             | 21 d                            | 1.4115                   | 1.4218 | 0.0000                     | 0.0000 |
|                             | 28 d                            | 1.4046                   | 1.4183 | 0.0000                     | 0.0000 |
|                             | 42 d                            | 1.3911                   | 1.4115 | 0.0000                     | 0.0000 |

Metabolite CGA 171895 (M5)

Data gap

Metabolite CGA 179710

Parameters used in FOCUS<sub>sw</sub> step 1 and 2

Molecular weight: 166.2  
 Soil or water metabolite: soil  
 Koc/Kom (mL/g): 269/156  
 Water solubility (mg/L): 1700  
 DT<sub>50</sub> soil (d): 1000 (worst case)  
 DT<sub>50</sub> water/sediment system (d): 1000 (worst case)  
 DT<sub>50</sub> water (d): 1000 (worst case)  
 DT<sub>50</sub> sediment (d): 1000 (worst case)  
 Crop interception (%): 3 (minimal crop cover)  
 Maximum occurrence observed (% molar basis with respect to the parent):  
 Total Water and Sediment: 2.4%  
 Soil: 27.5%

Application rate

Crop and growth stage: soybeans BBCH 10-14  
 Number of applications: 1  
 Interval (d): -  
 Application rate(s): 75 g a.s./ha  
 Application window: Mar-May.

| FOCUS STEP<br>1<br>Scenario | Day after<br>overall<br>maximum | PEC <sub>SW</sub> (µg/L) |        | PEC <sub>SED</sub> (µg/kg) |        |
|-----------------------------|---------------------------------|--------------------------|--------|----------------------------|--------|
|                             |                                 | Actual                   | TWA    | Actual                     | TWA    |
|                             | 0 h                             | 2.2567                   |        | 6.0524                     |        |
|                             | 24 h                            | 2.2534                   | 2.2551 | 6.0616                     | 6.0570 |
|                             | 2 d                             | 2.2518                   | 2.2538 | 6.0574                     | 6.0583 |
|                             | 4 d                             | 2.2487                   | 2.2520 | 6.0490                     | 6.0557 |
|                             | 7 d                             | 2.2440                   | 2.2496 | 6.0364                     | 6.0502 |
|                             | 14 d                            | 2.2332                   | 2.2441 | 6.0072                     | 6.0360 |
|                             | 21 d                            | 2.2224                   | 2.2387 | 5.9782                     | 6.0216 |

|      |        |        |        |        |
|------|--------|--------|--------|--------|
| 28 d | 2.2116 | 2.2332 | 5.9492 | 6.0071 |
| 42 d | 2.1902 | 2.2225 | 5.8918 | 5.9782 |

### Treatments during March to May

| FOCUS STEP<br>2<br>Scenario | Day after<br>overall<br>maximum | PEC <sub>SW</sub> (µg/L) |        | PEC <sub>SED</sub> (µg/kg) |        |
|-----------------------------|---------------------------------|--------------------------|--------|----------------------------|--------|
|                             |                                 | Actual                   | TWA    | Actual                     | TWA    |
| Southern EU                 | 0 h                             | 0.7088                   | ---    | 1.9042                     | ---    |
|                             | 24 h                            | 0.7079                   | 0.7084 | 1.9029                     | 1.9035 |
|                             | 2 d                             | 0.7074                   | 0.7080 | 1.9015                     | 1.9029 |
|                             | 4 d                             | 0.7064                   | 0.7074 | 1.8989                     | 1.9015 |
|                             | 7 d                             | 0.7049                   | 0.7067 | 1.8950                     | 1.8996 |
|                             | 14 d                            | 0.7015                   | 0.7050 | 1.8858                     | 1.8950 |
|                             | 21 d                            | 0.6981                   | 0.7032 | 1.8767                     | 1.8904 |
|                             | 28 d                            | 0.6947                   | 0.7015 | 1.8676                     | 1.8858 |
|                             | 42 d                            | 0.6880                   | 0.6982 | 1.8495                     | 1.8767 |

### Early application

| FOCUS STEP<br>3 | Water<br>body | Day after<br>overall<br>maximum | PEC <sub>SW</sub> (µg/L) |        | PEC <sub>SED</sub> (µg/kg) |        |
|-----------------|---------------|---------------------------------|--------------------------|--------|----------------------------|--------|
|                 |               |                                 | Actual                   | TWA    | Actual                     | TWA    |
| R3              | stream        | 0 h                             | 0.0541                   | --     | 0.0518                     | --     |
|                 |               | 24 h                            | 0.0001                   | 0.0391 | 0.0480                     | 0.0508 |
|                 |               | 2 d                             | 0.0001                   | 0.0208 | 0.0480                     | 0.0497 |
|                 |               | 4 d                             | 0.0378                   | 0.0105 | 0.0424                     | 0.0480 |
|                 |               | 7 d                             | 0.0001                   | 0.0069 | 0.0375                     | 0.0449 |
|                 |               | 14 d                            | 0.0000                   | 0.0058 | 0.0456                     | 0.0438 |
|                 |               | 21 d                            | 0.0000                   | 0.0039 | 0.0373                     | 0.0432 |
|                 |               | 28 d                            | 0.0001                   | 0.0038 | 0.0391                     | 0.0430 |
|                 |               | 42 d                            | 0.0000                   | 0.0033 | 0.0411                     | 0.0427 |
| R4              | stream        | 0 h                             | 0.0149                   | --     | 0.0172                     | --     |
|                 |               | 24 h                            | 0.0000                   | 0.0094 | 0.0153                     | 0.0166 |
|                 |               | 2 d                             | 0.0000                   | 0.0087 | 0.0139                     | 0.0159 |
|                 |               | 4 d                             | 0.0097                   | 0.0044 | 0.0118                     | 0.0146 |
|                 |               | 7 d                             | 0.0000                   | 0.0037 | 0.0129                     | 0.0140 |
|                 |               | 14 d                            | 0.0000                   | 0.0023 | 0.0095                     | 0.0127 |
|                 |               | 21 d                            | 0.0000                   | 0.0015 | 0.0080                     | 0.0115 |
|                 |               | 28 d                            | 0.0000                   | 0.0011 | 0.0072                     | 0.0106 |
|                 |               | 42 d                            | 0.0000                   | 0.0008 | 0.0061                     | 0.0093 |



## Late application

| FOCUS STEP<br>3 | Water<br>body | Day after<br>overall<br>maximum | PEC <sub>SW</sub> (µg/L) |        | PEC <sub>SED</sub> (µg/kg) |        |
|-----------------|---------------|---------------------------------|--------------------------|--------|----------------------------|--------|
|                 |               |                                 | Actual                   | TWA    | Actual                     | TWA    |
| R3              | stream        | 0 h                             | 0.1507                   | ..     | 0.1555                     | --     |
|                 |               | 24 h                            | 0.0014                   | 0.1267 | 0.1411                     | 0.1518 |
|                 |               | 2 d                             | 0.0006                   | 0.0675 | 0.1402                     | 0.1474 |
|                 |               | 4 d                             | 0.0003                   | 0.0340 | 0.1224                     | 0.1412 |
|                 |               | 7 d                             | 0.0001                   | 0.0195 | 0.1083                     | 0.1312 |
|                 |               | 14 d                            | 0.0003                   | 0.0190 | 0.1342                     | 0.1279 |
|                 |               | 21d                             | 0.0882                   | 0.0127 | 0.1105                     | 0.1266 |
|                 |               | 28 d                            | 0.0001                   | 0.0124 | 0.1152                     | 0.1265 |
|                 |               | 42 d                            | 0.0002                   | 0.0106 | 0.1195                     | 0.149  |
| R4              | stream        | 0 h                             | 0.03477                  | --     | 0.0366                     | --     |
|                 |               | 24 h                            | 0.0000                   | 0.0203 | 0.0321                     | 0.0351 |
|                 |               | 2 d                             | 0.0000                   | 0.0192 | 0.0286                     | 0.0335 |
|                 |               | 4 d                             | 0.0208                   | 0.0098 | 0.0241                     | 0.0307 |
|                 |               | 7 d                             | 0.0000                   | 0.0085 | 0.0261                     | 0.0291 |
|                 |               | 14 d                            | 0.0000                   | 0.0051 | 0.0191                     | 0.0261 |
|                 |               | 21 d                            | 0.0000                   | 0.0034 | 0.0163                     | 0.0235 |
|                 |               | 28 d                            | 0.0000                   | 0.0025 | 0.0146                     | 0.0216 |
|                 |               | 42 d                            | 0.0000                   | 0.0017 | 0.0126                     | 0.0190 |

Metabolite MT6

Data gap

Metabolites guanidine and 3-guanidine-1-butene

PEC<sub>SW</sub> and PEC<sub>SED</sub> calculation assumptions

PEC<sub>sw</sub> were calculated for water phase metabolites guanidine and 3-guanidine-1-butene based on their maximum observed formation in water, the maximum Step 2 PEC<sub>sw</sub> and PEC<sub>SED</sub> for oxasulfuron (6.4 µg/L and 1.1 µg/kg) and assuming the same molecular weight as oxasulfuron in the absence of specific data for 3-guanidine-1-butene.

Results

|                      | Max occ % | Molecular weight | PEC <sub>sw</sub> µg/L | PEC <sub>sed</sub> µg/kg |
|----------------------|-----------|------------------|------------------------|--------------------------|
| Oxasulfuron          | -         | 406.4            | 6.4                    | 1.1                      |
| guanidine            | 33        | 59.07            | 0.31                   | 0.05                     |
| 3-guanidine-1-butene | 24        | 406.4            | 1.54                   | 0.26                     |

### Estimation of concentrations from other routes of exposure (Regulation (EU) N° 284/2013, Annex Part A, point 9.4)

Method of calculation

PEC calculation from other routes of exposure is not necessary

#### PEC

Maximum concentration

PEC calculation from other routes of exposure is not necessary

## Ecotoxicology

### Effects on birds and other terrestrial vertebrates (Regulation (EU) N° 283/2013, Annex Part A, point 8.1 and Regulation (EU) N° 284/2013, Annex Part A, point 10.1)

| Species                                                                                                             | Test substance | Time scale | End point        | Toxicity (mg/kg bw per day) |
|---------------------------------------------------------------------------------------------------------------------|----------------|------------|------------------|-----------------------------|
| Birds                                                                                                               |                |            |                  |                             |
| Bobwhite quail                                                                                                      | a.s.           | Acute      | LD <sub>50</sub> | >2250                       |
| Mallard duck                                                                                                        | a.s.           | Acute      | LD <sub>50</sub> | >2250                       |
| Bobwhite quail                                                                                                      | a.s.           | Short-term | LD <sub>50</sub> | >1613                       |
| Mallard duck                                                                                                        | a.s.           | Short-term | LD <sub>50</sub> | >1831                       |
| Bobwhite quail                                                                                                      | a.s.           | Long-term  | NOEL             | 6.91                        |
| Mallard duck                                                                                                        | a.s.           | Long-term  | NOEL             | 12.67                       |
| Mammals                                                                                                             |                |            |                  |                             |
| Rat                                                                                                                 | a.s.           | Acute      | LD <sub>50</sub> | >5000                       |
| Rat                                                                                                                 | a.s.           | Long-term  | NOAEL            | 8.3                         |
| Endocrine disrupting properties (Annex Part A, points 8.1.5)                                                        |                |            |                  |                             |
| No indication for potential endocrine disrupting properties from the data available in the section of ecotoxicology |                |            |                  |                             |
| Additional higher tier studies (Annex Part A, points 10.1.1.2):                                                     |                |            |                  |                             |
| No higher tier studies submitted                                                                                    |                |            |                  |                             |
| Terrestrial vertebrate wildlife (birds, mammals, reptile and amphibians) (Annex Part A, points 8.1.4, 10.1.3):      |                |            |                  |                             |
| No available data                                                                                                   |                |            |                  |                             |

### Toxicity/exposure ratios for terrestrial vertebrates (Regulation (EU) N° 284/2013, Part A, Annex point 10.1)

**Soybean (BBCH 10-14): 0.1 kg formulated product/ha corresponding to 75 g oxasulfuron/ha**

| Growth stage             | Indicator or focal species                   | Time scale | DDD (mg/kg bw per day) | TER         | Trigger |
|--------------------------|----------------------------------------------|------------|------------------------|-------------|---------|
| Screening Step (Birds)   |                                              |            |                        |             |         |
| BBCH 10-14               | Small omnivorous bird                        | Acute      | 11.91                  | >189        | 10      |
| BBCH 10-14               | Small omnivorous bird                        | Long-term  | 2.58                   | <b>2.68</b> | 5       |
| Tier 1 (Birds)           |                                              |            |                        |             |         |
| BBCH 10-14               | Small granivorous bird (finch)               | Long-term  | 0.453                  | 15.25       | 5       |
| BBCH 10-14               | Small omnivorous bird (lark)                 | Long-term  | 0.433                  | 15.96       | 5       |
| BBCH 10-14               | Medium herbivorous/granivorous bird (pigeon) | Long-term  | 0.902                  | 7.66        | 5       |
| BBCH 10-14               | Small insectivorous bird (wagtail)           | Long-term  | 0.449                  | 15.40       | 5       |
| Screening Step (Mammals) |                                              |            |                        |             |         |
| BBCH 10-                 | Small herbivorous mammal                     | Acute      | 10.23                  | >489        | 10      |

|                  |                                      |           |      |            |   |
|------------------|--------------------------------------|-----------|------|------------|---|
| 14               |                                      |           |      |            |   |
| BBCH 10-14       | Small herbivorous mammal             | Long-term | 2.87 | <b>2.9</b> | 5 |
| Tier 1 (Mammals) |                                      |           |      |            |   |
| BBCH 10-14       | Large herbivorous mammal "lagomorph" | Long-term | 0.57 | 14.6       | 5 |
| BBCH 10-14       | Small omnivore mammal "mouse"        | Long-term | 0.31 | 26.8       | 5 |
| BBCH 10-14       | Small insectivore mammal "shrew"     | Long-term | 0.17 | 49.7       | 5 |

**Risk from bioaccumulation and food chain behaviour** – not necessary ( $\log K_{ow} < 3$  for active substance and metabolites)

**Risk from consumption of contaminated water**

**Puddle scenario, Screening step**

Application rate (g a.s./ha)/relevant endpoint  $\leq 50$  (koc < 500 L/kg), TER calculation not needed

**Bold values** do not meet the trigger

### Toxicity data for all aquatic tested species (Regulation (EU) N° 283/2013, Annex Part A, points 8.2 and Regulation (EU) N° 284/2013 Annex Part A, point 10.2)\*

\* This section does not yet reflect the new EFSA Guidance Document on aquatic organisms which has been noted in the meeting of the Standing Committee on Plants, Animals, Food and Feed on 11 July 2014.

<sup>1</sup> (<sub>(nom)</sub> nominal concentration; (<sub>(im)</sub> initial measured concentration; (<sub>(mm)</sub> mean measured concentration; prep.: preparation; a.s.: active substance

| Group                        | Test substance       | Time-scale (Test type)                     | End point                                                  | Toxicity <sup>1</sup>                     |
|------------------------------|----------------------|--------------------------------------------|------------------------------------------------------------|-------------------------------------------|
| Laboratory tests             |                      |                                            |                                                            |                                           |
| Fish                         |                      |                                            |                                                            |                                           |
| <i>Lepomis macrochirus</i>   | a.s.                 | 96 hr (flow-through)                       | Mortality, LC <sub>50</sub>                                | <b>&gt; 111 (mm)</b>                      |
| <i>Oncorhynchus mykiss</i>   | a.s.                 | 96 hr (flow-through)                       | Mortality, LC <sub>50</sub>                                | > 116 (mm)                                |
| <i>Cyprinodon variegatus</i> | a.s.                 | 96 hr (flow-through)                       | Mortality, LC <sub>50</sub>                                | > 113 (mm)                                |
| <i>Pimephales promelas</i>   | a.s.                 | 35 d (flow-through)                        | Survival and Growth NOEC                                   | <b>114 (mm)</b>                           |
| <i>Oncorhynchus mykiss</i>   | CGA 297691 (CA2013A) | 96 hr (flow-through)                       | Mortality, LC <sub>50</sub>                                | <b>&gt; 100 (nom)</b>                     |
| <i>Oncorhynchus mykiss</i>   | C1801 (CA2006A)      | 96 hr (static)                             | Mortality, $\epsilon$ LC <sub>50</sub>                     | <b>&gt; 100 (nom)</b>                     |
| Aquatic invertebrates        |                      |                                            |                                                            |                                           |
| <i>Daphnia magna</i>         | a.s.                 | 48 h (flow-through)                        | Immobility, EC <sub>50</sub>                               | >89.4 (mm)                                |
| <i>Crassostrea virginica</i> | a.s.                 | 96 h (flow-through)                        | Shell deposition, EC <sub>50</sub>                         | >132 (mm)                                 |
| <i>Mysidopsis bahia</i>      | a.s.                 | 48 h (flow-through)<br>96 h (flow-through) | Mortality, LC <sub>50</sub><br>Mortality, LC <sub>50</sub> | <b>&gt;109 (mm)</b><br><b>82.6 (mm)</b>   |
| <i>Daphnia magna</i>         | a.s.*                | 48 h (flow-through)                        | Immobility, EC <sub>50</sub>                               | >136 (mm)                                 |
| <i>Daphnia magna</i>         | a.s.                 | 21 d (flow-through)                        | Reproduction, NOEC<br>Reproduction, EC <sub>10</sub>       | <b>14 (mm)</b><br>14.3 (mm)<br>28.85 (mm) |

| Group                                  | Test substance        | Time-scale (Test type) | End point                                                                                                                                              | Toxicity <sup>1</sup>                                                                            |
|----------------------------------------|-----------------------|------------------------|--------------------------------------------------------------------------------------------------------------------------------------------------------|--------------------------------------------------------------------------------------------------|
|                                        |                       |                        | Reproduction, EC <sub>20</sub>                                                                                                                         |                                                                                                  |
| <i>Daphnia magna</i>                   | CGA 297691 (CA2013A)  | 48 h (static)          | Immobility, EC <sub>50</sub>                                                                                                                           | <b>&gt;100 (nom)</b>                                                                             |
| <i>Daphnia magna</i>                   | C1801 (CA2006A)       | 48 h (static)          | Immobility, EC <sub>50</sub>                                                                                                                           | <b>&gt;100 (nom)</b>                                                                             |
| Algae^^                                |                       |                        |                                                                                                                                                        |                                                                                                  |
| <i>Navicula pelliculosa</i>            | a.s.                  | 72 h (static)          | 72h E <sub>v</sub> C <sub>50</sub><br>72h E <sub>r</sub> C <sub>50</sub>                                                                               | >100 (nom)<br>>100 (nom)                                                                         |
| <i>Pseudokirchneriella subcapitata</i> | a.s.                  | 72 h (static)          | 72h E <sub>v</sub> C <sub>50</sub><br>72h E <sub>r</sub> C <sub>50</sub>                                                                               | 0.256 (mm)<br><b>1.30 (mm)</b>                                                                   |
| <i>Pseudokirchneriella subcapitata</i> | Laguna 75 WG          | 72 h (static)          | E <sub>r</sub> C <sub>50</sub><br>72 h E <sub>v</sub> C <sub>50</sub>                                                                                  | 2.25 (a.s., mm)<br>0.225 (a.s., mm)                                                              |
| <i>Pseudokirchneriella subcapitata</i> | CGA 297691 (CA2013A)* | 120h (static)          | 72h E <sub>b</sub> C <sub>50</sub><br>120h E <sub>b</sub> C <sub>50</sub><br>72h E <sub>r</sub> C <sub>50</sub><br>120h E <sub>r</sub> C <sub>50</sub> | <b>&gt;0.097 (mm)</b><br><b>&gt;0.097 (mm)</b><br><b>&gt;0.097 (mm)</b><br><b>&gt;0.097 (mm)</b> |
| <i>Selenastrum capricornutum</i>       | CGA 297691 (CA2013A)  | 72 h (static)          | 72h E <sub>b</sub> C <sub>50</sub><br>72h E <sub>r</sub> C <sub>50</sub>                                                                               | >96.8 (mm)<br>>96.8 (mm)                                                                         |
| Higher plant                           |                       |                        |                                                                                                                                                        |                                                                                                  |
| <i>Lemna gibba</i>                     | a.s.*                 | 14 d (static)          | 7d , frond count E <sub>b</sub> C <sub>50</sub><br>7d , frond count E <sub>r</sub> C <sub>50</sub><br>14d, frond count NOEC                            | 0.0015 (mm)<br><b>0.00324 (mm)</b><br><b>0.00020 (mm)</b>                                        |
| <i>Lemna gibba</i>                     | Laguna 75 WG          | 7 d (semi-static)      | Biomass: E <sub>v</sub> C <sub>50</sub><br>Growth rate: E <sub>r</sub> C <sub>50</sub>                                                                 | 2.23 (mm)<br>5.59 (mm)                                                                           |
| <i>Lemna gibba</i>                     | CGA 297691 (CA2013A)* | 14 d (static)          | Frond count, dry weight, EC <sub>50</sub>                                                                                                              | <b>&gt;0.08 (mm)</b>                                                                             |

Further testing on aquatic organisms

No further tests submitted

Potential endocrine disrupting properties (Annex Part A, point 8.2.3)

No indication for potential endocrine disrupting properties from the data available in the section of ecotoxicology

<sup>1</sup> (nom) nominal concentration; (mm) mean measured concentration; (im) initial measured concentration; prep.: preparation; a.s.: active substance

\* radiolabelled active substance.

Endpoint marked in bold used in the risk assessment

### Bioconcentration in fish (Annex Part A, point 8.2.2.3)

|                                                                                              | Active substance | C1801 (CA2006A) | CGA 297691 (CA2013A) | CGA 171895    | CGA 179710    | CGA 297691    |
|----------------------------------------------------------------------------------------------|------------------|-----------------|----------------------|---------------|---------------|---------------|
| logP <sub>O/W</sub>                                                                          | -0.81            | 0.97*           | 0.45*                | 1.30*         | 0.835*        | -1.09*        |
| Steady-state bioconcentration factor (BCF) (total wet weight/normalised to 5% lipid content) | Not required     | Not required    | Not required         | Not required  | Not required  | Not required  |
| Uptake/depuration kinetics BCF                                                               | Not performed    | Not performed   | Not performed        | Not performed | Not performed | Not performed |

|                                                                                 |               |               |               |               |               |               |
|---------------------------------------------------------------------------------|---------------|---------------|---------------|---------------|---------------|---------------|
| (total wet weight/normalised to 5% lipid content)                               |               |               |               |               |               |               |
| Annex VI Trigger for the bioconcentration factor                                |               |               |               |               |               |               |
| Clearance time (days) (CT <sub>50</sub> )                                       | Not performed | Not performed | Not performed | Not performed | Not performed | Not performed |
| (CT <sub>90</sub> )                                                             | Not performed | Not performed | Not performed | Not performed | Not performed | Not performed |
| Level and nature of residues (%) in organisms after the 14 day depuration phase |               |               |               |               |               |               |
| Higher tier study                                                               |               |               |               |               |               |               |
| No higher tier studies submitted                                                |               |               |               |               |               |               |

\*Values estimated by the WSKOWWIN V1.67 program contained in the US EPA's EPISUITE package of predictive models

**Toxicity/exposure ratios for the most sensitive aquatic organisms (Regulation (EU) N° 284/2013, Annex Part A, point 10.2)**
**Maximum PEC<sub>sw</sub> values and TER values for oxasulfuron for FOCUS Step 1 Scenario – application to Soybean (BBCH 10-14):  
0.1 Ł kg formulated product/ha corresponding to 75 g oxasulfuron/ha**

| Scenario                    | PEC Step 1<br>(µg/L) | Fish acute                | Fish prolonged     | Invertebrate acute      | Invertebrate prolonged | Algae                          | Aquatic plants                 |
|-----------------------------|----------------------|---------------------------|--------------------|-------------------------|------------------------|--------------------------------|--------------------------------|
|                             |                      | <i>L. macrochirus</i>     | <i>P. promelas</i> | <i>Mysidopsis bahia</i> | <i>D. magna</i>        | <i>P. subcapitata</i>          | <i>L. gibba</i>                |
|                             |                      | LC <sub>50</sub>          | NOEC               | EC <sub>50</sub>        | NOEC                   | E <sub>r</sub> C <sub>50</sub> | E <sub>r</sub> C <sub>50</sub> |
|                             |                      | >111000 µg/L              | 114000 µg/L        | 82600 µg/L              | 14000 µg/L             | 1300µg/L                       | 3.24µg/L                       |
| <b>oxasulfuron</b>          | 25.1                 | >4422                     | 4542               | 3290                    | 558                    | 51.8                           | <b>0.13</b>                    |
|                             |                      | <i>O. mykiss</i>          | <i>n.a.</i>        | <i>D. magna</i>         | <i>n.a.</i>            | <i>P. subcapitata</i>          | <i>L. gibba</i>                |
|                             |                      | LC <sub>50</sub>          |                    | EC <sub>50</sub>        |                        | E <sub>r</sub> C <sub>50</sub> | E <sub>r</sub> C <sub>50</sub> |
|                             |                      | >100000 µg/L              |                    | >100000 µg/L            |                        | 1300 <sup>b</sup> µg/L         | 3.24 <sup>b</sup> µg/L         |
| <b>C1801 (CA2006A)</b>      | 5.12                 | >19607                    |                    | >19607                  |                        | 254                            | <b>0.63</b>                    |
|                             |                      | <i>O. mykiss</i>          | <i>n.a.</i>        | <i>D. magna</i>         | <i>n.a.</i>            | <i>P. subcapitata</i>          | <i>L. gibba</i>                |
|                             |                      | LC <sub>50</sub>          |                    | EC <sub>50</sub>        |                        | E <sub>r</sub> C <sub>50</sub> | EC <sub>50</sub>               |
|                             |                      | >100000 µg/L              |                    | >100000 µg/L            |                        | >97 µg/L                       | >80 µg/L                       |
| <b>CGA 297691 (CA2013A)</b> | 5.31                 | >18832                    |                    | >18832                  |                        | >18.27                         | >15.1                          |
|                             |                      | <i>P. promelas</i>        | <i>n.a.</i>        | <i>D. magna</i>         | <i>n.a.</i>            | <i>P. subcapitata</i>          | <i>L. gibba</i>                |
|                             |                      | LC <sub>50</sub>          |                    | EC <sub>50</sub>        |                        | E <sub>r</sub> C <sub>50</sub> | E <sub>r</sub> C <sub>50</sub> |
|                             |                      | 17300 µg/L                |                    | 86200 <sup>b</sup> µg/L |                        | 1300 <sup>b</sup> µg/L         | 3.24 <sup>b</sup> µg/L         |
| <b>CGA 27913</b>            | 17.22                | 1004                      |                    | 5000                    |                        | 75                             | <b>0.19</b>                    |
|                             |                      | <i>L. macrochirus</i>     | <i>n.a.</i>        | <i>Mysidopsis bahia</i> | <i>n.a.</i>            | <i>P. subcapitata</i>          | <i>L. gibba</i>                |
|                             |                      | LC <sub>50</sub>          |                    | EC <sub>50</sub>        |                        | E <sub>r</sub> C <sub>50</sub> | E <sub>r</sub> C <sub>50</sub> |
|                             |                      | >111000 <sup>b</sup> µg/L |                    | 82600 <sup>b</sup> µg/L |                        | 1300 <sup>b</sup> µg/L         | 3.24 <sup>b</sup> µg/L         |
| <b>CGA 179710</b>           | 2.26                 | >49115                    |                    | 36415                   |                        | 575                            | <b>1.43</b>                    |
|                             |                      | <i>L. macrochirus</i>     | <i>n.a.</i>        | <i>Mysidopsis bahia</i> | <i>n.a.</i>            | <i>P. subcapitata</i>          | <i>L. gibba</i>                |
|                             |                      | LC <sub>50</sub>          |                    | EC <sub>50</sub>        |                        | E <sub>r</sub> C <sub>50</sub> | E <sub>r</sub> C <sub>50</sub> |
|                             |                      | >11100 <sup>a</sup> µg/L  |                    | 8260 <sup>a</sup> µg/L  |                        | 130 <sup>a</sup> µg/L          | 0.324 <sup>a</sup> µg/L        |
| <b>M3</b>                   | 6.71                 | >1654                     |                    | 1230                    |                        | 19.37                          | <b>0.05</b>                    |
| Annex VI Trigger            |                      | 100                       | 10                 | 100                     | 10                     | 10                             | 10                             |

<sup>a</sup> Surrogate value, conservatively assuming acute toxicity to be  $\times 10$  higher than that of the parent active substance.

<sup>b</sup> Surrogate value, conservatively assuming toxicity to be equal to that of the parent active substance.

**Bold values** do not meet the trigger

### Maximum PEC<sub>sw</sub> values and TER values for oxasulfuron for FOCUS Step 2 Scenario – application to Soybean (BBCH 10-14): 0.1 kg formulated producta corresponding to 75 g oxasulfuron/ha

| Scenario                     | PEC Step 2 (SEU) (µg/L) | Fish acute                | Fish prolonged     | Invertebrate acute      | Invertebrate prolonged | Algae                          | Aquatic plants                 |
|------------------------------|-------------------------|---------------------------|--------------------|-------------------------|------------------------|--------------------------------|--------------------------------|
|                              |                         | <i>L. macrochirus</i>     | <i>P. promelas</i> | <i>Mysidopsis bahia</i> | <i>D. magna</i>        | <i>P. subcapitata</i>          | <i>L. gibba</i>                |
|                              |                         | LC <sub>50</sub>          | NOEC               | EC <sub>50</sub>        | NOEC                   | E <sub>r</sub> C <sub>50</sub> | E <sub>r</sub> C <sub>50</sub> |
|                              |                         | >111000 µg/L              | 114000 µg/L        | 82600 µg/L              | 14000 µg/L             | 1300µg/L                       | 3.24µg/L                       |
| <b>oxasulfuron</b>           | <b>6.42</b>             | >17290                    | 17757              | 12866                   | 2181                   | 202                            | <b>0.50</b>                    |
|                              |                         | <i>O. mykiss</i>          | <i>n.a.</i>        | <i>D. magna</i>         | <i>n.a.</i>            | <i>P. subcapitata</i>          | <i>L. gibba</i>                |
|                              |                         | LC <sub>50</sub>          |                    | EC <sub>50</sub>        |                        | E <sub>r</sub> C <sub>50</sub> | E <sub>r</sub> C <sub>50</sub> |
|                              |                         | >100000 µg/L              |                    | >100000 µg/L            |                        | 1300 <sup>b</sup> µg/L         | 3.24 <sup>b</sup> µg/L         |
| <b>C1801 (CA2006A)</b>       | <b>1.38</b>             | >72464                    |                    | >72464                  |                        | 942                            | <b>2.35</b>                    |
|                              |                         | <i>O. mykiss</i>          | <i>n.a.</i>        | <i>D. magna</i>         | <i>n.a.</i>            | <i>P. subcapitata</i>          | <i>L. gibba</i>                |
|                              |                         | LC <sub>50</sub>          |                    | EC <sub>50</sub>        |                        | E <sub>r</sub> C <sub>50</sub> | EC <sub>50</sub>               |
|                              |                         | >100000 µg/L              |                    | >100000 µg/L            |                        | >97 µg/L                       | >80 µg/L                       |
| <b>CGA 297691 (CA2013A)</b>  | <b>1.43</b>             | >69930                    |                    | >69930                  |                        | >68                            | >56                            |
|                              |                         | <i>P. promelas</i>        | <i>n.a.</i>        | <i>D. magna</i>         | <i>n.a.</i>            | <i>P. subcapitata</i>          | <i>L. gibba</i>                |
|                              |                         | LC <sub>50</sub>          |                    | EC <sub>50</sub>        |                        | E <sub>r</sub> C <sub>50</sub> | E <sub>r</sub> C <sub>50</sub> |
|                              |                         | 17300 µg/L                |                    | 86200 <sup>b</sup> µg/L |                        | 1300 <sup>b</sup> µg/L         | 3.24 <sup>b</sup> µg/L         |
| <b>CGA 27913 (saccharin)</b> | <b>4.75</b>             | 3642                      |                    | 18147                   |                        | 273                            | <b>0.68</b>                    |
|                              |                         | <i>L. macrochirus</i>     | <i>n.a.</i>        | <i>Mysidopsis bahia</i> | <i>n.a.</i>            | <i>P. subcapitata</i>          | <i>L. gibba</i>                |
|                              |                         | LC <sub>50</sub>          |                    | EC <sub>50</sub>        |                        | E <sub>r</sub> C <sub>50</sub> | E <sub>r</sub> C <sub>50</sub> |
|                              |                         | >111000 <sup>b</sup> µg/L |                    | 82600 <sup>b</sup> µg/L |                        | 1300 <sup>b</sup> µg/L         | 3.24 <sup>b</sup> µg/L         |
| <b>CGA 179710</b>            | <b>0.71</b>             | >156338                   |                    | 116338                  |                        | 1831                           | <b>4.56</b>                    |
|                              |                         | <i>L. macrochirus</i>     | <i>n.a.</i>        | <i>Mysidopsis bahia</i> | <i>n.a.</i>            | <i>P. subcapitata</i>          | <i>L. gibba</i>                |
|                              |                         | LC <sub>50</sub>          |                    | EC <sub>50</sub>        |                        | E <sub>r</sub> C <sub>50</sub> | E <sub>r</sub> C <sub>50</sub> |
|                              |                         | >11100 <sup>a</sup> µg/L  |                    | 8260 <sup>a</sup> µg/L  |                        | 130 <sup>a</sup> µg/L          | 0.324 <sup>a</sup> µg/L        |



|                         |      |            |           |            |           |           |             |
|-------------------------|------|------------|-----------|------------|-----------|-----------|-------------|
| <b>M3</b>               | 2.14 | >5187      |           | 3859       |           | 61        | <b>0.15</b> |
| <b>Annex VI Trigger</b> |      | <b>100</b> | <b>10</b> | <b>100</b> | <b>10</b> | <b>10</b> | <b>10</b>   |

<sup>a</sup> Surrogate value, conservatively assuming acute toxicity to be ×10 higher than that of the parent active substance.

<sup>b</sup> Surrogate value, conservatively assuming toxicity to be equal to that of the parent active substance.

### TER calculation for FOCUS Step 3-4 (20m VFS) Scenario for oxasulfuron– application to Soybean (BBCH 10-14): 0.1 Ł kg formulated product/ha corresponding to 75 g oxasulfuron/ha (worst case between early and late application)

| Scenario                | PEC<br>(µg/L) | Fish acute            | Fish prolonged     | Invertebrate acute      | Invertebrate prolonged | Algae                          | Aquatic plants                 |
|-------------------------|---------------|-----------------------|--------------------|-------------------------|------------------------|--------------------------------|--------------------------------|
|                         |               | <i>L. macrochirus</i> | <i>P. promelas</i> | <i>Mysidopsis bahia</i> | <i>D. magna</i>        | <i>P. subcapitata</i>          | <i>L. gibba</i>                |
|                         |               | LC <sub>50</sub>      | NOEC               | EC <sub>50</sub>        | NOEC                   | E <sub>r</sub> C <sub>50</sub> | E <sub>r</sub> C <sub>50</sub> |
|                         |               | >111000 µg/L          | 114000 µg/L        | 82600 µg/L              | 14000 µg/L             | 1300µg/L                       | 3.24µg/L                       |
| <b>Step 3</b>           |               |                       |                    |                         |                        |                                |                                |
| R3                      | 2.621         | 42350                 | 43495              | 31515                   | 5341                   | 496                            | <b>1.24</b>                    |
| R4                      | 0.272         | 408088                | 419118             | 303676                  | 51471                  | 4779                           | 11.91                          |
| <b>Step 4 (20m VFS)</b> |               |                       |                    |                         |                        |                                |                                |
| R3                      | 0.620         | 179032                | 183871             | 133226                  | 22581                  | 2097                           | <b>5.23</b>                    |
| R4                      | 0.033         | 3468750               | 3562500            | 2581250                 | 437500                 | 40625                          | 101                            |

**Bold values** do not meet the trigger

### TER calculation for FOCUS Step 3 Scenario for C1801 (CA2006A)– application to Soybean (BBCH 10-14): 0.1 Ł kg formulated product/ha corresponding to 75 g oxasulfuron/ha (worst case between early and late application)

| Scenario      | PEC<br>(µg/L) | Fish acute       | Fish prolonged | Invertebrate acute | Invertebrate prolonged | Algae                          | Aquatic plants                 |
|---------------|---------------|------------------|----------------|--------------------|------------------------|--------------------------------|--------------------------------|
|               |               | <i>O. mykiss</i> | <i>n.a.</i>    | <i>D. magna</i>    | <i>n.a.</i>            | <i>P. subcapitata</i>          | <i>L. gibba</i>                |
|               |               | LC <sub>50</sub> |                | EC <sub>50</sub>   |                        | E <sub>r</sub> C <sub>50</sub> | E <sub>r</sub> C <sub>50</sub> |
|               |               | >100000 µg/L     |                | >100000 µg/L       |                        | 1300 <sup>b</sup> µg/L         | 3.24 <sup>b</sup> µg/L         |
| <b>Step 3</b> |               |                  |                |                    |                        |                                |                                |
| R3            | 0.135         | 740741           |                | 740741             |                        | 9630                           | 24                             |
| R4            | 0.007         | 14285714         |                | 14285714           |                        | 185714                         | 463                            |

<sup>b</sup> Surrogate value, conservatively assuming toxicity to be equal to that of the parent active substance.

**TER calculation for FOCUS Step 3 Scenario for CGA 179710 – application to Soybean (BBCH 10-14): 0.1 L kg formulated product./ha corresponding to 75 g oxasulfuron/ha (worst case between early and late application)**

| Scenario      | PEC (µg/L) | Fish acute                | Fish prolonged | Invertebrate acute      | Invertebrate prolonged | Algae                          | Aquatic plants                 |
|---------------|------------|---------------------------|----------------|-------------------------|------------------------|--------------------------------|--------------------------------|
|               |            | <i>L. macrochirus</i>     | <i>n.a.</i>    | <i>Mysidopsis bahia</i> | <i>n.a.</i>            | <i>P. subcapitata</i>          | <i>L. gibba</i>                |
|               |            | LC <sub>50</sub>          |                | EC <sub>50</sub>        |                        | E <sub>r</sub> C <sub>50</sub> | E <sub>r</sub> C <sub>50</sub> |
|               |            | >111000 <sup>b</sup> µg/L |                | 82600 <sup>b</sup> µg/L |                        | 1300 <sup>b</sup> µg/L         | 3.24 <sup>b</sup> µg/L         |
| <b>Step 3</b> |            |                           |                |                         |                        |                                |                                |
| R3            | 0.151      | 735099                    |                | 547020                  |                        | 8609                           | 21                             |
| R4            | 0.035      | 3171429                   |                | 2360000                 |                        | 37143                          | 93                             |

<sup>b</sup> Surrogate value, conservatively assuming toxicity to be equal to that of the parent active substance.

**TER calculation for FOCUS Step 3-4 (20m VFS) Scenario for M3– application to Soybean (BBCH 10-14): 0.1 kg formulated product/ha corresponding to 75 g oxasulfuron/ha (worst case between early and late application)**

| Scenario                | PEC (µg/L) | Fish acute               | Fish prolonged | Invertebrate acute      | Invertebrate prolonged | Algae                          | Aquatic plants                 |
|-------------------------|------------|--------------------------|----------------|-------------------------|------------------------|--------------------------------|--------------------------------|
|                         |            | <i>L. macrochirus</i>    | <i>n.a.</i>    | <i>Mysidopsis bahia</i> | <i>n.a.</i>            | <i>P. subcapitata</i>          | <i>L. gibba</i>                |
|                         |            | LC <sub>50</sub>         |                | EC <sub>50</sub>        |                        | E <sub>r</sub> C <sub>50</sub> | E <sub>r</sub> C <sub>50</sub> |
|                         |            | >11100 <sup>a</sup> µg/L |                | 8260 <sup>a</sup> µg/L  |                        | 130 <sup>a</sup> µg/L          | 0.324 <sup>a</sup> µg/L        |
| <b>Step 3</b>           |            |                          |                |                         |                        |                                |                                |
| R3                      | 0.54       | 20518                    |                | 15268                   |                        | 240                            | <b>0.60</b>                    |
| R4                      | 0.008      | 1387500                  |                | 1032500                 |                        | 16250                          | 41                             |
| <b>Step 4 (20m VFS)</b> |            |                          |                |                         |                        |                                |                                |
| R3                      | 0.129      | 86047                    |                | 64031                   |                        | 1008                           | <b>2.51</b>                    |
| R4                      | 0.002      | 5550000                  |                | 4130000                 |                        | 65000                          | 162                            |

<sup>a</sup> Surrogate value, conservatively assuming acute toxicity to be ×10 higher than that of the parent active substance.

**Bold values** do not meet the trigger

## Effects on bees (Regulation (EU) N° 283/2013, Annex Part A, point 8.3.1 and Regulation (EU) N° 284/2013 Annex Part A, point 10.3.1)\*

\* This section does not reflect the new EFSA Guidance Document on bees which has not yet been noted by the Standing Committee on Plants, Animals, Food and Feed.

| Species                                | Test substance | Time scale/type of endpoint | End point                                              | toxicity                                           |
|----------------------------------------|----------------|-----------------------------|--------------------------------------------------------|----------------------------------------------------|
| <i>Apis mellifera</i>                  | a.s.           | Acute                       | Oral toxicity (LD <sub>50</sub> )                      | >100 µg/bee                                        |
| <i>Apis mellifera</i>                  | a.s.           | Acute                       | Larval toxicity (single exposure)* (LD <sub>50</sub> ) | >20 µg/bee                                         |
| <i>Apis mellifera</i>                  | Laguna 75 WG   | Chronic                     | LC <sub>50</sub>                                       | >6.847 g product/kg food (5.136 g a.s./kg food)    |
|                                        |                |                             | NOEC                                                   | ≥6.847 g product/kg food (5.136 g a.s./kg food)    |
|                                        |                |                             | LDD <sub>50</sub>                                      | >191.4 µg product/bee/day (>143.5 µg a.s./bee/day) |
|                                        |                |                             | NOED                                                   | ≥191.4 µg product/bee/day (143.5 µg a.s./bee/day)  |
| Semi-field test (Cage and tunnel test) |                |                             |                                                        |                                                    |
| No further tests submitted             |                |                             |                                                        |                                                    |
| Field tests                            |                |                             |                                                        |                                                    |
| No further tests submitted             |                |                             |                                                        |                                                    |

\*The study was not used in the risk assessment, since it is not considered suitable

### Risk assessment for bees from contact and oral dietary exposure - application to Soybean (BBCH 10-14): 0.1 kg formulated product./ha corresponding to 75 g oxasulfuron/ha

| Species                                                       | Test substance | Scenario     | Risk quotient                     | HQ/ETR     | Trigger |
|---------------------------------------------------------------|----------------|--------------|-----------------------------------|------------|---------|
| Consumption of pollen and nectar - Screening level assessment |                |              |                                   |            |         |
| <i>Apis mellifera</i>                                         | a.s.           | Not relevant | ETR <sub>acute adult oral</sub>   | < 0.0057   | 0.2     |
| <i>Apis mellifera</i>                                         | a.s.           | Not relevant | ETR <sub>chronic adult oral</sub> | <0.004     | 0.03    |
| Consumption of guttation water - Screening level assessment   |                |              |                                   |            |         |
| <i>Apis mellifera</i>                                         | a.s.           | Not relevant | ETR <sub>acute adult oral</sub>   | < 0.006    | 0.2     |
| <i>Apis mellifera</i>                                         | a.s.           | Not relevant | ETR <sub>chronic adult oral</sub> | <0.002     | 0.03    |
| Consumption of surface water* - Screening level assessment    |                |              |                                   |            |         |
| <i>Apis mellifera</i>                                         | a.s.           | Not relevant | ETR <sub>acute adult oral</sub>   | < 0.000003 | 0.2     |
| <i>Apis mellifera</i>                                         | a.s.           | Not relevant | ETR <sub>chronic adult oral</sub> | < 0.000002 | 0.03    |

\*PEC<sub>sw</sub> calculated at Step1

## Effects on other arthropod species (Regulation (EU) N° 283/2013, Annex Part A, point 8.3.2 and Regulation (EU) N° 284/2013 Annex Part A, point 10.3.2)

### Laboratory tests with standard sensitive species

| Species                      | Test Substance | End point                                                   | Toxicity                                                                                                                                  |
|------------------------------|----------------|-------------------------------------------------------------|-------------------------------------------------------------------------------------------------------------------------------------------|
| <i>Typhlodromus pyri</i>     | Laguna 75 WG   | Mortality, LR <sub>50</sub><br>Reproduction,<br>reduction % | 3.23 g a.s./ha<br><50% at the highest tested<br>rate with sufficient survivors<br>for reproduction assessment<br>(7.8% at 3.19 g a.s./ha) |
| <i>Aphidius rhopalosiphi</i> | Laguna 75 WG   | Mortality LR <sub>50</sub><br>Reproduction,<br>reduction %  | >75 g a.s./ha<br><50% (25.9% at 37.5 g<br>a.s./ha)                                                                                        |
| Additional species           |                |                                                             |                                                                                                                                           |
| None submitted               |                |                                                             |                                                                                                                                           |

### First tier risk assessment for –Soybean (BBCH 10-14): 0.1 kg formulated product/ha corresponding to 75 g oxasulfuron/ha

| Test substance | Species                      | Effect (LR <sub>50</sub> g/ha) | HQ in-field | HQ off-field (1 m) | Trigger |
|----------------|------------------------------|--------------------------------|-------------|--------------------|---------|
| Laguna 75 WG   | <i>Typhlodromus pyri</i>     | 3.23 g a.s./ha                 | <b>23.2</b> | 0.6                | 2       |
| Laguna 75 WG   | <i>Aphidius rhopalosiphi</i> | >75 g a.s./ha                  | <1          | <0.03              | 2       |

### Extended laboratory tests, aged residue tests

| Species                  | Life stage             | Test substance, substrate     | Time scale       | Dose (g product/ha) | End point        | % effect* |
|--------------------------|------------------------|-------------------------------|------------------|---------------------|------------------|-----------|
| <i>Typhlodromus pyri</i> | Protonymphs and adults | Laguna 75 WG, leaf bean discs | 14 d of exposure | 4.688               | reproduction     | 8         |
|                          |                        |                               |                  | 9.375               |                  | 8.2       |
|                          |                        |                               |                  | 18.75               |                  | 0.5       |
|                          |                        |                               |                  | 37.5                |                  | 3.8       |
|                          |                        |                               |                  | 75                  |                  | 1.3       |
| <i>Poecilus cupreus</i>  | Adults                 | Laguna 75 WG, sandy soil      | 14 d of exposure | 4.688               | Food consumption | 25.9      |
|                          |                        |                               |                  | 9.375               |                  | 12.9      |
|                          |                        |                               |                  | 18.75               |                  | 2.9       |
|                          |                        |                               |                  | 37.5                |                  | 15.1      |
|                          |                        |                               |                  | 75                  |                  | 12.2      |

#### Semi-field tests

No studies submitted

#### Field studies

No studies submitted

#### Additional specific test

No studies submitted

\*(positive values = adverse effects)

## Effects on non-target soil meso- and macro fauna; effects on soil nitrogen transformation (Regulation (EU) N° 283/2013, Annex Part A, points 8.4, 8.5, and Regulation (EU) N° 284/2013 Annex Part A, points 10.4, 10.5)

| Test organism             | Test substance | Application method of test a.s./ OM <sup>1</sup> | Time scale    | End point    | Toxicity (mg/kg d.w. soil) |
|---------------------------|----------------|--------------------------------------------------|---------------|--------------|----------------------------|
| Earthworms                |                |                                                  |               |              |                            |
| <i>Eisenia foetida</i>    | a.s.           | Incorporated into soil / 10% OM                  | Acute (14d)   | Mortality    | LC <sub>50</sub> > 1000    |
| <i>Eisenia foetida</i>    | Laguna 75 WG   | Incorporated into soil / 10% OM                  | Chronic (56d) | Reproduction | NOEC= 2                    |
| <i>Eisenia foetida</i>    | CGA 27913*     | Incorporated into soil / 10% OM                  | Chronic (56d) | Reproduction | NOEC=0.04                  |
| Other soil macroorganisms |                |                                                  |               |              |                            |
| No studies submitted      |                |                                                  |               |              |                            |

\*endpoint (metabolite IN-00581) from the EFSA conclusion on metsulfuron-methyl (EFSA, 2015)

### Higher tier testing (e.g. modelling or field studies)

No studies submitted

|                         |               |                                                                                                                                                                     |                                                                            |
|-------------------------|---------------|---------------------------------------------------------------------------------------------------------------------------------------------------------------------|----------------------------------------------------------------------------|
| Nitrogen transformation | Laguna 75 WG* | Maximum tested rate of 0.5 kg product/ha (0.67 mg test item/kg soil dry weight), corresponding to 375 g a.s./ha (0.50 mg a.s./kg soil dry weight); Sandy loam soil. | 11.5% effect at day 70 at 0.50 mg a.s./kg soil dry weight (=375 g a.s./ha) |
|-------------------------|---------------|---------------------------------------------------------------------------------------------------------------------------------------------------------------------|----------------------------------------------------------------------------|

\*Considering the length of the study, the DT50 in soil and the % of formation of the metabolites reached the maximum in the degradation studies in soil (both aerobic and anaerobic) in short times, metabolites are covered in the study.

### Toxicity/exposure ratios for soil organisms

#### Soybean (BBCH 10-14): 0.1 kg formulated product/ha corresponding to 75 g oxasulfuron/ha

| Test organism | Test substance | Time scale | Soil PEC (actual) | TER      | Trigger |
|---------------|----------------|------------|-------------------|----------|---------|
| Earthworms    |                |            |                   |          |         |
|               | a.s.           | Acute      | 0.065             | 15384.62 | 10      |
|               | a.s.           | Chronic    | 0.065             | 30.77    | 5       |

|  |                      |         |        |                         |   |
|--|----------------------|---------|--------|-------------------------|---|
|  | CGA 27913            | Chronic | 0.029  | <b>1.38<sup>b</sup></b> | 5 |
|  | C 1801 (CA2006A)     | Chronic | 0.011  | 18.18 <sup>a</sup>      | 5 |
|  | CGA171895            | Chronic | 0.002  | 100 <sup>a</sup>        | 5 |
|  | CGA 179710           | Chronic | 0.007  | 28.6 <sup>a</sup>       | 5 |
|  | CGA 297691 (CA2013A) | Chronic | 0.0025 | 80 <sup>a</sup>         | 5 |
|  | M3                   | Chronic | 0.017  | 11.76 <sup>a</sup>      | 5 |

Other soil macroorganisms

<sup>a</sup> assuming toxicity to be ×10 higher than that of the parent active substance<sup>b</sup> based on worst case toxicity endpoint from EFSA conclusion for metsulfuron-methyl (EFSA Journal 2015;13(1):3936), acceptable risk demonstrated by higher tier risk assessment.

### Effects on terrestrial non target higher plants (Regulation (EU) N° 283/2013, Annex Part A, point 8.6 and Regulation (EU) N° 284/2013 Annex Part A, point 10.6)

Screening data

Not required for herbicides or plant growth regulators as ER<sub>50</sub> tests should be provided

#### Laboratory dose response tests\*

| Test substance | Species  | ER <sub>50</sub> (g a.s./ha) vegetative vigour | ER <sub>50</sub> ** (g a.s./ha) emergence |
|----------------|----------|------------------------------------------------|-------------------------------------------|
| Laguna 75 WG   | Oat      | -                                              | 122                                       |
|                | Corn     |                                                | 152                                       |
|                | Ryegrass |                                                | 24                                        |
|                | Onion    |                                                | 149                                       |
|                | Radish   |                                                | 129                                       |
|                | Cabbage  |                                                | 225                                       |
|                | Lettuce  |                                                | >75                                       |
|                | Tomato   |                                                | >75                                       |
|                | Cucumber |                                                | >375                                      |
|                | Pea      |                                                | >215.6                                    |

\*Risk assessment for non-target terrestrial plants could not be finalised due to the lack of data on vegetative vigour.

\*\*ER<sub>50</sub>s are based on shoot height. Please note, that for all the tested species, except the most sensitive one (ryegrass) the endpoint based of fresh weight is lower

### Effects on biological methods for sewage treatment (Regulation (EU) N° 283/2013, Annex Part A, point 8.8)

| Test type/organism    | end point                                    |
|-----------------------|----------------------------------------------|
| Activated sludge      | 3-hour EC <sub>50</sub> > 1000 mg a.s./L     |
| Activated sludge      | 3-hour EC <sub>50</sub> > 1000 mg CA 2006A/L |
| <i>Pseudomonas sp</i> | No data were available                       |

### Monitoring data (Regulation (EU) N° 283/2013, Annex Part A, point 8.9 and Regulation (EU) N° 284/2013, Annex Part A, point 10.8)

Available monitoring data concerning adverse effect of the a.s.

No data available

Available monitoring data concerning effect of the PPP.

No data available

## Definition of the residue for monitoring (Regulation (EU) N° 283/2013, Annex Part A, point 7.4.2) Ecotoxicologically relevant compounds<sup>1</sup>

|             |                                                                             |
|-------------|-----------------------------------------------------------------------------|
| Compartment |                                                                             |
| soil        | Oxasulfuron (CGA-277476), CGA 27913 (saccharin)                             |
| water       | Oxasulfuron (CGA-277476), M3 (pending), MT6 (pending), CGA 171895 (Pending) |
| sediment    | -                                                                           |
| groundwater | -                                                                           |

<sup>1</sup> metabolites are considered relevant when, based on the risk assessment, they pose a risk comparable or higher than the parent

## Classification and labelling with regard to ecotoxicological data (Regulation (EU) N° 283/2013, Annex Part A, Section 10)

|                                                                                                                                                                                                |                                                                                                                                     |
|------------------------------------------------------------------------------------------------------------------------------------------------------------------------------------------------|-------------------------------------------------------------------------------------------------------------------------------------|
| Substance                                                                                                                                                                                      | oxasulfuron (ISO)<br>oxetan-3-yl 2-[(4,6-dimethylpyrimidin-2-yl)-<br>carbamoylsulfamoyl]benzoate                                    |
| Harmonised classification according to Regulation (EC) No 1272/2008 and its Adaptations to Technical Process [Table 3.1 of Annex VI of Regulation (EC) No 1272/2008 as amended] <sup>6</sup> : | Aquatic Acute 1 – H400<br>Aquatic Chronic 1 - H410                                                                                  |
| Peer review proposal <sup>7</sup> for harmonised classification according to Regulation (EC) No 1272/2008:                                                                                     | Aquatic Acute 1 – H400 (M=100)<br>Aquatic Chronic 1 - H410 (M=100)<br><i>Proposal is based upon the endpoint for aquatic plants</i> |

<sup>6</sup> Regulation (EC) No 1272/2008 of the European Parliament and of the Council of 16 December 2008 on classification, labelling and packaging of substances and mixtures, amending and repealing Directives 67/548/EEC and 1999/45/EC, and amending Regulation (EC) No 1907/2006. OJ L 353, 31.12.2008, 1-1355.

<sup>7</sup> It should be noted that harmonised classification and labelling is formally proposed and decided in accordance with Regulation (EC) No 1272/2008. Proposals for classification made in the context of the evaluation procedure under Regulation (EC) No 1107/2009 are not formal proposals.

## Abbreviations

|                   |                                                                   |
|-------------------|-------------------------------------------------------------------|
| 1/ <i>n</i>       | slope of Freundlich isotherm                                      |
| $\lambda$         | wavelength                                                        |
| $\varepsilon$     | decadic molar extinction coefficient                              |
| a.s.              | active substance                                                  |
| AChE              | acetylcholinesterase                                              |
| ADE               | actual dermal exposure                                            |
| ADI               | acceptable daily intake                                           |
| AF                | assessment factor                                                 |
| AAOEL             | acute acceptable operator exposure level                          |
| AOEL              | acceptable operator exposure level                                |
| AP                | alkaline phosphatase                                              |
| AR                | applied radioactivity                                             |
| ARfD              | acute reference dose                                              |
| AST               | aspartate aminotransferase (SGOT)                                 |
| AUC               | area under the blood concentration/time curve                     |
| AV                | avoidance factor                                                  |
| BCF               | bioconcentration factor                                           |
| BUN               | blood urea nitrogen                                               |
| bw                | body weight                                                       |
| CAS               | Chemical Abstracts Service                                        |
| CFU               | colony-forming units                                              |
| ChE               | cholinesterase                                                    |
| CI                | confidence interval                                               |
| CIPAC             | Collaborative International Pesticides Analytical Council Limited |
| CL                | confidence limits                                                 |
| C <sub>max</sub>  | concentration achieved at peak blood level                        |
| DAA               | days after application                                            |
| DAT               | days after treatment                                              |
| DDD               | daily dietary dose                                                |
| DM                | dry matter                                                        |
| DT <sub>50</sub>  | period required for 50% dissipation (define method of estimation) |
| DT <sub>90</sub>  | period required for 90% dissipation (define method of estimation) |
| dw                | dry weight                                                        |
| EbC <sub>50</sub> | effective concentration (biomass)                                 |
| EC <sub>50</sub>  | effective concentration                                           |
| ECHA              | European Chemicals Agency                                         |



|                       |                                                                                                                                                     |
|-----------------------|-----------------------------------------------------------------------------------------------------------------------------------------------------|
| EEC                   | European Economic Community                                                                                                                         |
| EMDI                  | estimated maximum daily intake                                                                                                                      |
| ER <sub>50</sub>      | emergence rate/effective rate, median                                                                                                               |
| ErC <sub>50</sub>     | effective concentration (growth rate)                                                                                                               |
| ETR                   | exposure toxicity ratio                                                                                                                             |
| ETR <sub>acute</sub>  | exposure toxicity ratio for acute exposure                                                                                                          |
| ETR <sub>larvae</sub> | exposure toxicity ratio for chronic exposure                                                                                                        |
| ETR <sub>larvae</sub> | exposure toxicity ratio for larvae                                                                                                                  |
| ETR <sub>HPG</sub>    | exposure toxicity ratio for effects on honeybee hypopharygeal glands                                                                                |
| EU                    | European Union                                                                                                                                      |
| EUROPOEM              | European Predictive Operator Exposure Model                                                                                                         |
| f(twa)                | Time-weighted average factor                                                                                                                        |
| FAO                   | Food and Agriculture Organization of the United Nations                                                                                             |
| FID                   | flame ionisation detector                                                                                                                           |
| FIR                   | food intake rate                                                                                                                                    |
| FOB                   | functional observation battery                                                                                                                      |
| FOCUS                 | Forum for the Co-ordination of Pesticide Fate Models and their Use                                                                                  |
| GAP                   | Good Agricultural Practice                                                                                                                          |
| GC                    | gas chromatography                                                                                                                                  |
| GCPF                  | Global Crop Protection Federation (formerly known as International Group of National Associations of Manufacturers of Agrochemical Products; GIFAP) |
| GGT                   | gamma glutamyl transferase                                                                                                                          |
| GM                    | geometric mean                                                                                                                                      |
| GS                    | growth stage                                                                                                                                        |
| GSH                   | glutathione                                                                                                                                         |
| Hb                    | haemoglobin                                                                                                                                         |
| Hct                   | haematocrit                                                                                                                                         |
| HPLC                  | high-pressure liquid chromatography<br>or high-performance liquid chromatography                                                                    |
| HPLC-MS               | high-pressure liquid chromatography–mass spectrometry                                                                                               |
| HPG                   | hypopharygeal glands                                                                                                                                |
| HQ                    | hazard quotient                                                                                                                                     |
| HQ <sub>contact</sub> | hazard quotient for contact exposure                                                                                                                |
| HR                    | hazard rate                                                                                                                                         |
| IEDI                  | international estimated daily intake                                                                                                                |
| IESTI                 | international estimated short-term intake                                                                                                           |
| ISO                   | International Organization for Standardization                                                                                                      |
| IUPAC                 | International Union of Pure and Applied Chemistry                                                                                                   |
| iv                    | intravenous                                                                                                                                         |

|             |                                                                                                                                                                                  |
|-------------|----------------------------------------------------------------------------------------------------------------------------------------------------------------------------------|
| JMPR        | Joint Meeting of the FAO Panel of Experts on Pesticide Residues in Food and the Environment and the WHO Expert Group on Pesticide Residues (Joint Meeting on Pesticide Residues) |
| $K_{doc}$   | organic carbon linear adsorption coefficient                                                                                                                                     |
| $K_{Foc}$   | Freundlich organic carbon adsorption coefficient                                                                                                                                 |
| LC          | liquid chromatography                                                                                                                                                            |
| $LC_{50}$   | lethal concentration, median                                                                                                                                                     |
| LC-MS       | liquid chromatography–mass spectrometry                                                                                                                                          |
| LC-MS-MS    | liquid chromatography with tandem mass spectrometry                                                                                                                              |
| $LD_{50}$   | lethal dose, median; dosis letalis media                                                                                                                                         |
| $LDD_{50}$  | lethal dietary dose; median                                                                                                                                                      |
| LDH         | lactate dehydrogenase                                                                                                                                                            |
| LOAEL       | lowest observable adverse effect level                                                                                                                                           |
| LOD         | limit of detection                                                                                                                                                               |
| LOQ         | limit of quantification                                                                                                                                                          |
| M/L         | mixing and loading                                                                                                                                                               |
| MAF         | multiple application factor                                                                                                                                                      |
| MCH         | mean corpuscular haemoglobin                                                                                                                                                     |
| MCHC        | mean corpuscular haemoglobin concentration                                                                                                                                       |
| MCV         | mean corpuscular volume                                                                                                                                                          |
| mm          | millimetre (also used for mean measured concentrations)                                                                                                                          |
| mN          | milli-newton                                                                                                                                                                     |
| MRL         | maximum residue level                                                                                                                                                            |
| MS          | mass spectrometry                                                                                                                                                                |
| MSDS        | material safety data sheet                                                                                                                                                       |
| MTD         | maximum tolerated dose                                                                                                                                                           |
| MWHC        | maximum water-holding capacity                                                                                                                                                   |
| NESTI       | national estimated short-term intake                                                                                                                                             |
| NOAEC       | no observed adverse effect concentration                                                                                                                                         |
| NOAEL       | no observed adverse effect level                                                                                                                                                 |
| NOEC        | no observed effect concentration                                                                                                                                                 |
| NOEL        | no observed effect level                                                                                                                                                         |
| NPD         | nitrogen–phosphorus detector                                                                                                                                                     |
| OECD        | Organisation for Economic Co-operation and Development                                                                                                                           |
| OM          | organic matter content                                                                                                                                                           |
| Pa          | pascal                                                                                                                                                                           |
| PD          | proportion of different food types                                                                                                                                               |
| PEC         | predicted environmental concentration                                                                                                                                            |
| $PEC_{air}$ | predicted environmental concentration in air                                                                                                                                     |

|                     |                                                                  |
|---------------------|------------------------------------------------------------------|
| PEC <sub>gw</sub>   | predicted environmental concentration in groundwater             |
| PEC <sub>sed</sub>  | predicted environmental concentration in sediment                |
| PEC <sub>soil</sub> | predicted environmental concentration in soil                    |
| PEC <sub>sw</sub>   | predicted environmental concentration in surface water           |
| PHED                | pesticide handler's exposure data                                |
| PHI                 | pre-harvest interval                                             |
| PIE                 | potential inhalation exposure                                    |
| pK <sub>a</sub>     | negative logarithm (to the base 10) of the dissociation constant |
| P <sub>ow</sub>     | partition coefficient between <i>n</i> -octanol and water        |
| PPE                 | personal protective equipment                                    |
| ppm                 | parts per million (10 <sup>-6</sup> )                            |
| PT                  | proportion of diet obtained in the treated area                  |
| PTT                 | partial thromboplastin time                                      |
| QSAR                | quantitative structure–activity relationship                     |
| r <sup>2</sup>      | coefficient of determination                                     |
| RPE                 | respiratory protective equipment                                 |
| RUD                 | residue per unit dose                                            |
| SC                  | suspension concentrate                                           |
| SD                  | standard deviation                                               |
| SFO                 | single first-order                                               |
| SMILES              | simplified molecular-input line-entry system                     |
| SPG                 | specific protection goal                                         |
| SSD                 | species sensitivity distribution                                 |
| STMR                | supervised trials median residue                                 |
| t <sub>1/2</sub>    | half-life (define method of estimation)                          |
| TER                 | toxicity exposure ratio                                          |
| TER <sub>A</sub>    | toxicity exposure ratio for acute exposure                       |
| TER <sub>LT</sub>   | toxicity exposure ratio following chronic exposure               |
| TER <sub>ST</sub>   | toxicity exposure ratio following repeated exposure              |
| TK                  | technical concentrate                                            |
| TLV                 | threshold limit value                                            |
| Tmax                | time until peak blood levels achieved                            |
| TMDI                | theoretical maximum daily intake                                 |
| TRR                 | total radioactive residue                                        |
| TSH                 | thyroid-stimulating hormone (thyrotropin)                        |
| TWA                 | time-weighted average                                            |
| UDS                 | unscheduled DNA synthesis                                        |
| UF                  | uncertainty factor                                               |

|     |                           |
|-----|---------------------------|
| UV  | ultraviolet               |
| W/S | water/sediment            |
| w/v | weight per unit volume    |
| w/w | weight per unit weight    |
| WBC | white blood cell          |
| WG  | water-dispersible granule |
| WHO | World Health Organization |
